# Supplementary material for: Antibacterial silver and gold complexes of imidazole and 1,2,4-triazole derived N-heterocyclic carbenes
Source: Royal Society of Chemistry journal article supplement (doi:10.1039/d2dt01657e), 2022-01-01
Supplement: d2dt01657e1.pdf [file d2dt01657e1.pdf]

**Electronic Supporting Information For:**

**Antibacterial silver and gold complexes of imidazole and 1,2,4-triazole  
derived *N*-heterocyclic carbenes**

Joel C. Mather,<sup>a</sup> Jessica A. Wyllie,<sup>a,b</sup> Alex Hamilton,<sup>c</sup> Tatiana P. Soares da Costa,<sup>a,b</sup> and Peter J. Barnard<sup>a\*</sup>

<sup>a</sup>Department of Biochemistry and Chemistry, La Trobe Institute for Molecular Science, La Trobe University, Victoria, 3086, Australia, E-mail: [p.barnard@latrobe.edu.au](mailto:p.barnard@latrobe.edu.au).

<sup>b</sup>Current address: School of Agriculture, Food and Wine, Waite Research Institute, University of Adelaide, South Australia, 5064, Australia

<sup>c</sup>Biomolecular Sciences Research Centre (BMRC) and Department of Biosciences and Chemistry, Sheffield Hallam University, Sheffield, S1 1WB, UK

**NMR Stability Studies**

**Time course <sup>1</sup>H-NMR studies**

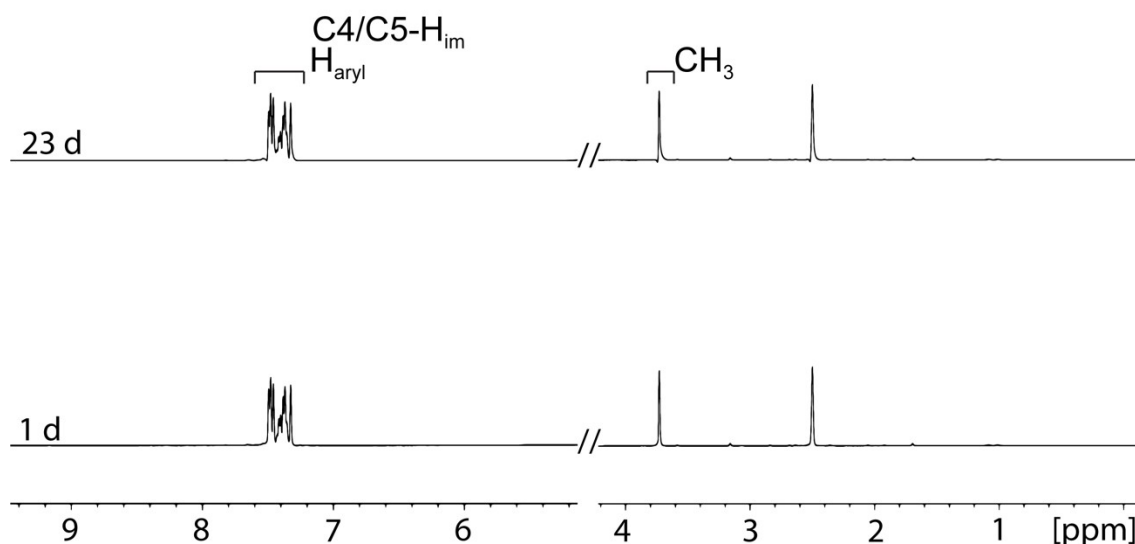

Figure S1. Selected <sup>1</sup>H NMR spectra recorded for a solution of the gold(I) complex **4a** in a mixture of 300 μL DMSO-*d*<sub>6</sub> and 300 μL H<sub>2</sub>O over a period of 23d at 25.0 ± 0.1 °C.

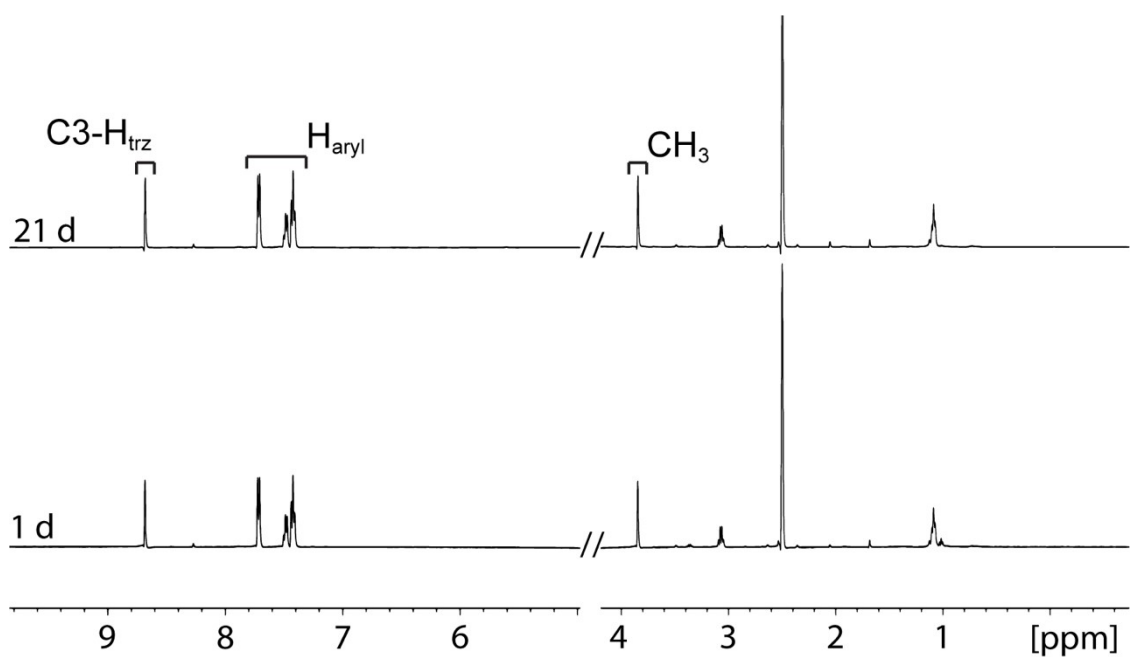

Figure S2. Selected  $^1\text{H}$  NMR spectra recorded for a solution of the gold(I) complex **4c** in a mixture of 300  $\mu\text{L}$   $\text{DMSO-}d_6$  and 300  $\mu\text{L}$   $\text{H}_2\text{O}$  over a period of 21d at  $25.0 \pm 0.1$   $^\circ\text{C}$ .

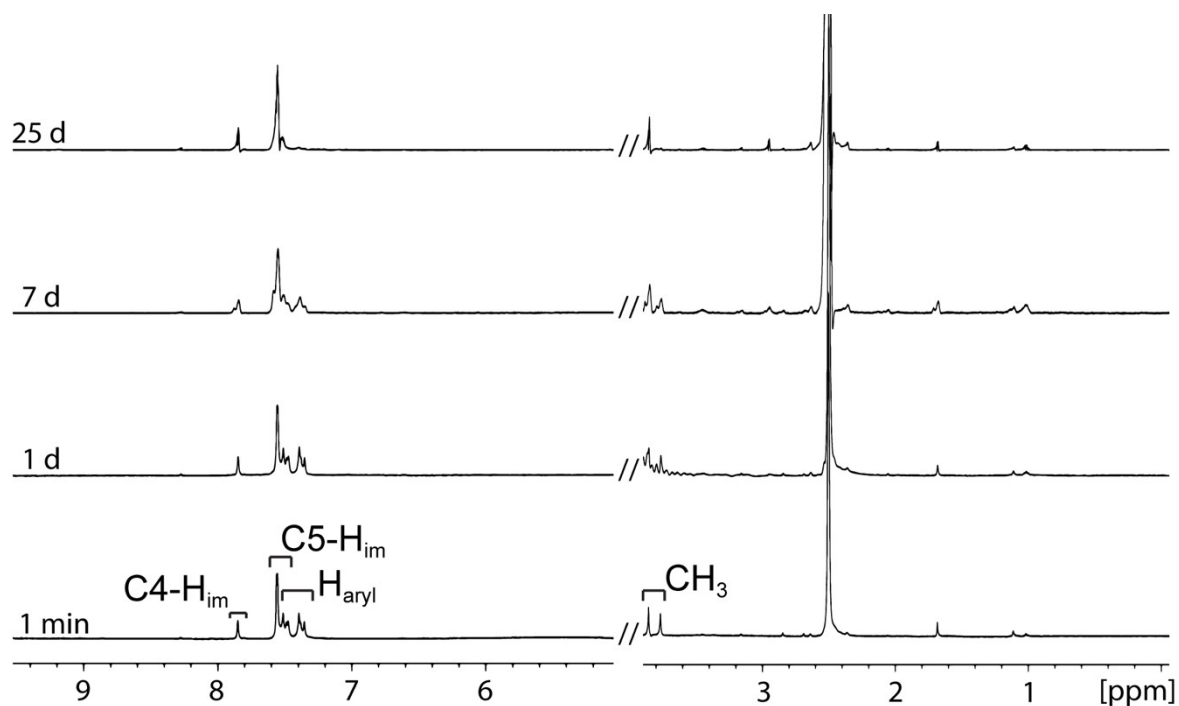

Figure S3. Selected  $^1\text{H}$  NMR spectra recorded for a solution of the silver(I) complex **3a** in a mixture of 300  $\mu\text{L}$   $\text{DMSO-}d_6$  and 300  $\mu\text{L}$   $\text{H}_2\text{O}$  over a period of 25 d at  $25.0 \pm 0.1$   $^\circ\text{C}$ .

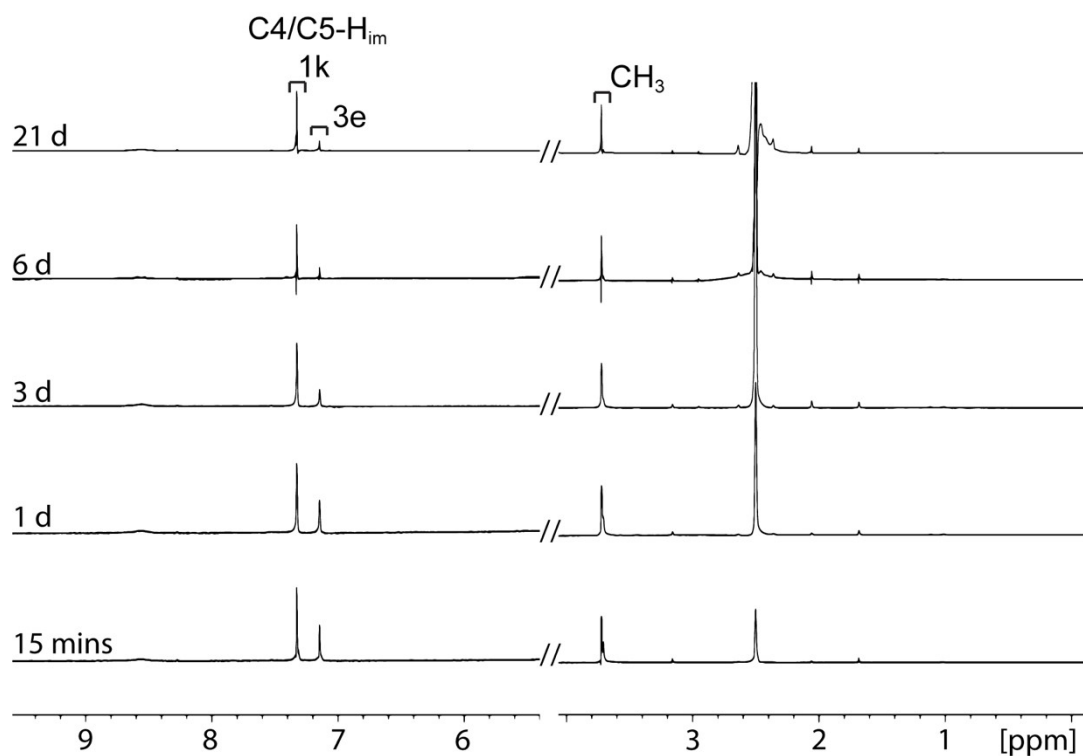

Figure S4. Selected  $^1\text{H}$  NMR spectra recorded for a solution of the silver(I) complex **3e** in a mixture of 300  $\mu\text{L}$   $\text{DMSO-}d_6$  and 300  $\mu\text{L}$   $\text{H}_2\text{O}$  over a period of 21d at  $25.0 \pm 0.1$   $^\circ\text{C}$ .

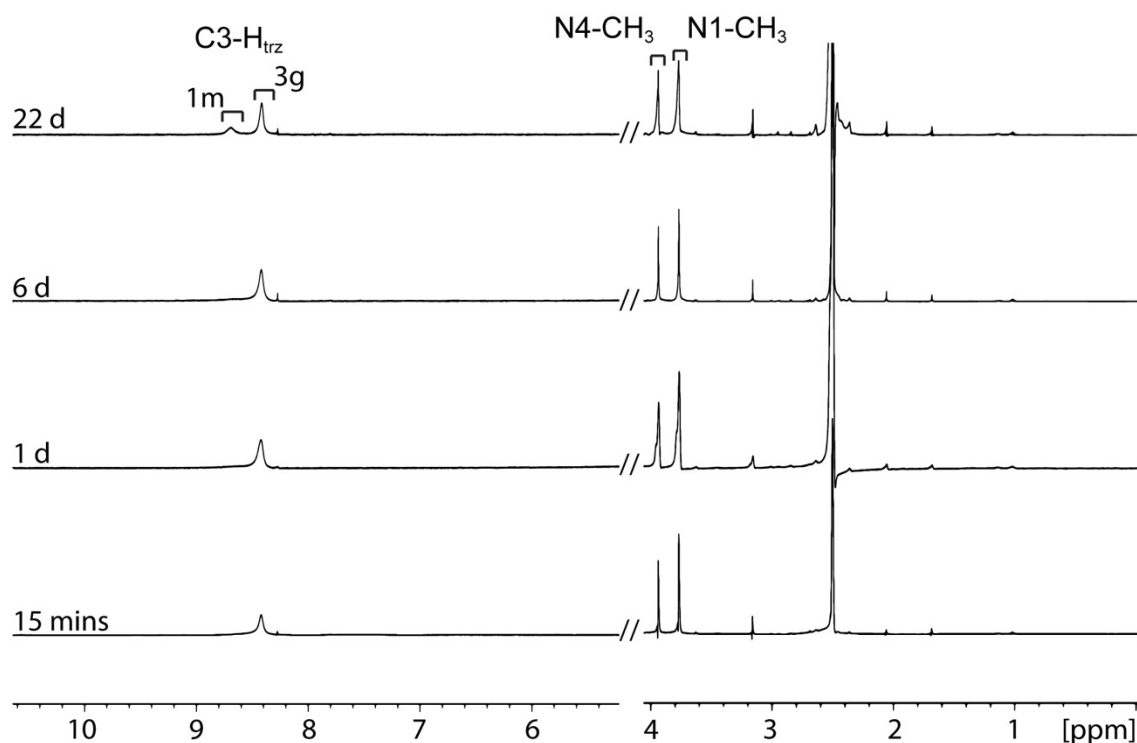

Figure S5. Selected  $^1\text{H}$  NMR spectra recorded for a solution of the silver(I) complex **3g** in a mixture of 300  $\mu\text{L}$   $\text{DMSO-}d_6$  and 300  $\mu\text{L}$   $\text{H}_2\text{O}$  over a period of 22 d at  $25.0 \pm 0.1$   $^\circ\text{C}$ .

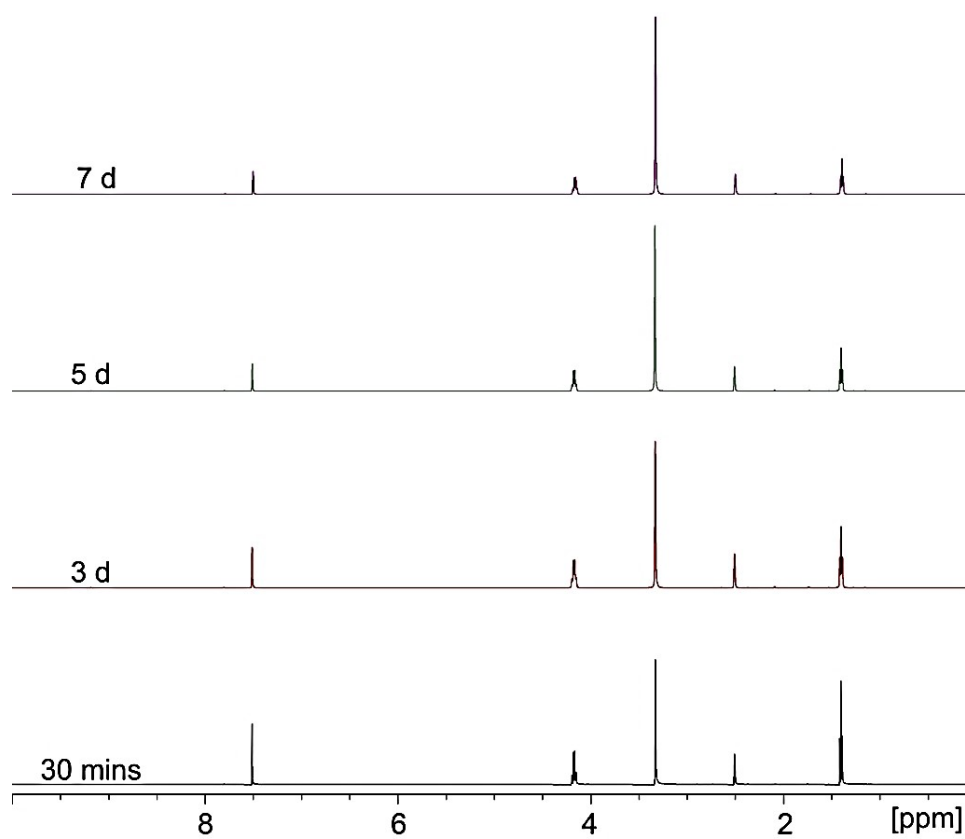

Figure S6. Stacked <sup>1</sup>H-NMR spectrums of compound **3f** in DMSO-*d*<sub>6</sub> over a period 7 days.

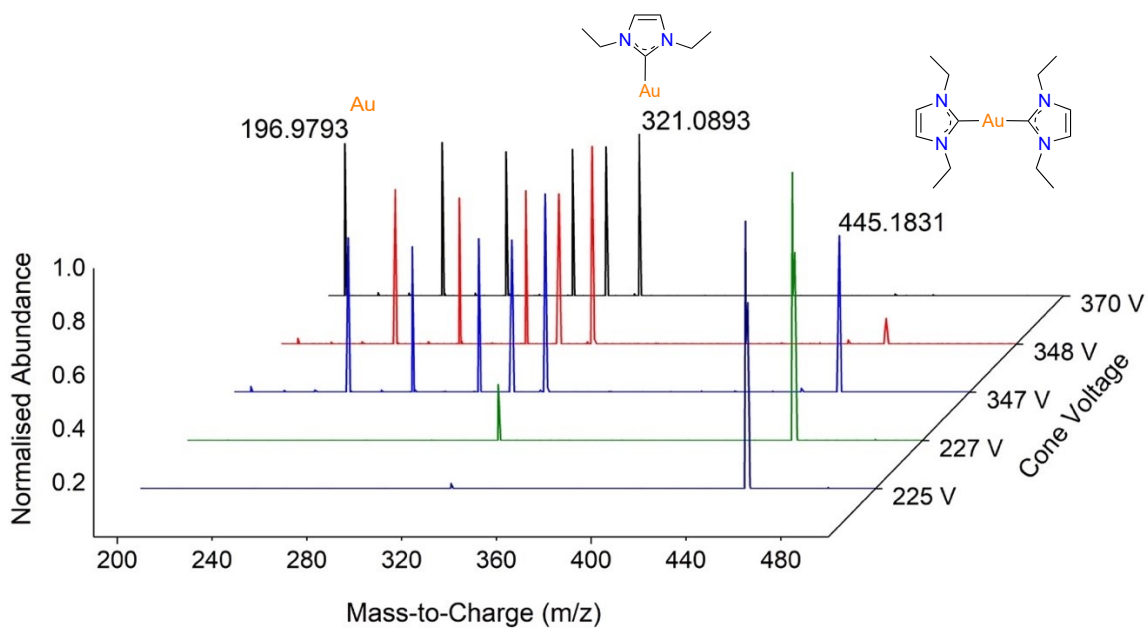

Figure S7. Normalised ESI-HR-MS plots at selected cone voltages for gold(I) complex **4f**.

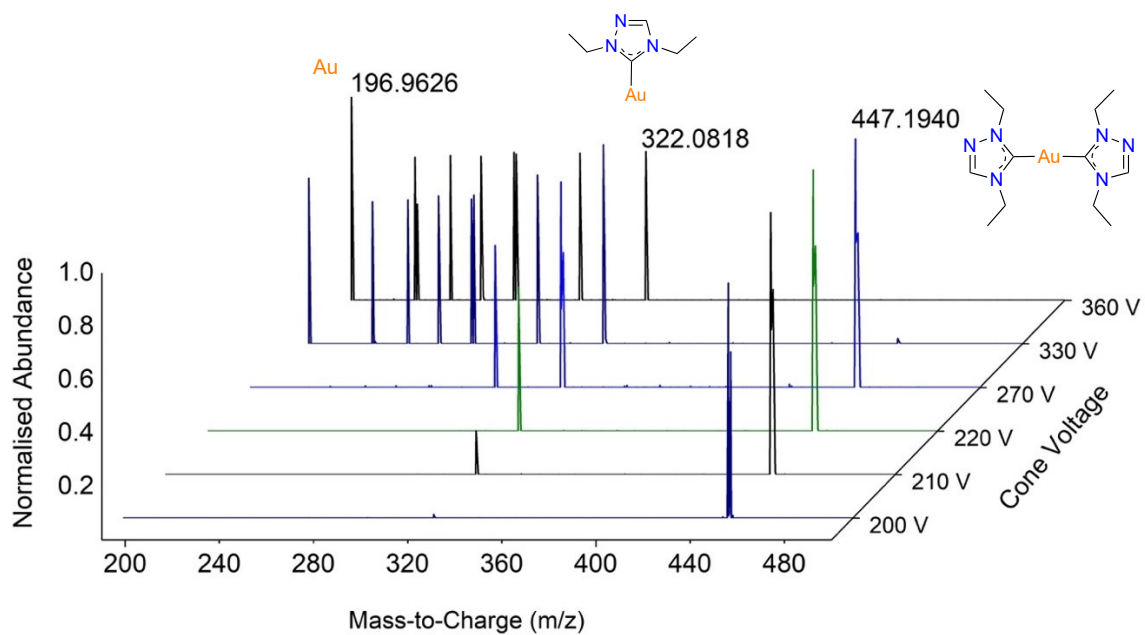

Figure S8. Normalised ESI-HR-MS plots at selected cone voltages for gold(I) complex **4h**.

## Further crystallographic Information

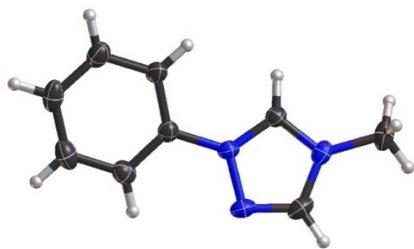

Figure S9. Representation of X-ray crystal structure of **1e**, the iodide anion has been omitted for clarity.

Table S1. Crystallographic data for **1e**, **3a**, **3c**

| Identification code                         | <b>1e</b>                                                     | <b>3a</b>                                                                      | <b>3c</b>                                                                   |
|---------------------------------------------|---------------------------------------------------------------|--------------------------------------------------------------------------------|-----------------------------------------------------------------------------|
| Empirical formula                           | C <sub>9</sub> H <sub>10</sub> IN <sub>3</sub>                | C <sub>20</sub> H <sub>20</sub> Ag <sub>2</sub> Cl <sub>2</sub> N <sub>4</sub> | C <sub>9</sub> H <sub>9</sub> Ag <sub>2</sub> I <sub>2</sub> N <sub>3</sub> |
| Formula weight                              | 287.10                                                        | 603.04                                                                         | 628.73                                                                      |
| Temperature/K                               | 150(2)                                                        | 150(15)                                                                        | 150(2)                                                                      |
| Crystal system                              | monoclinic                                                    | monoclinic                                                                     | monoclinic                                                                  |
| Space group                                 | P2 <sub>1</sub> /c                                            | P2 <sub>1</sub>                                                                | P2/n                                                                        |
| a/Å                                         | 7.83570(10)                                                   | 11.2662(2)                                                                     | 12.9749(2)                                                                  |
| b/Å                                         | 12.72860(10)                                                  | 7.39800(10)                                                                    | 7.37600(10)                                                                 |
| c/Å                                         | 14.2408(2)                                                    | 12.5768(2)                                                                     | 32.9550(5)                                                                  |
| α/°                                         | 90                                                            | 90                                                                             | 90                                                                          |
| β/°                                         | 131.433(2)                                                    | 96.300(2)                                                                      | 120.190(2)                                                                  |
| γ/°                                         | 90                                                            | 90                                                                             | 90                                                                          |
| Volume/Å <sup>3</sup>                       | 1064.87(3)                                                    | 1041.91(3)                                                                     | 2726.10(8)                                                                  |
| Z                                           | 4                                                             | 2                                                                              | 8                                                                           |
| ρ <sub>calc</sub> /cm <sup>3</sup>          | 1.791                                                         | 1.922                                                                          | 3.064                                                                       |
| μ/mm <sup>-1</sup>                          | 23.302                                                        | 2.149                                                                          | 58.438                                                                      |
| F(000)                                      | 552.0                                                         | 592.0                                                                          | 2272.0                                                                      |
| Crystal size/mm <sup>3</sup>                | 0.04 × 0.03 × 0.02                                            | 0.08 0.04 × 0.04                                                               | 0.03 × 0.02 × 0.02                                                          |
| Radiation                                   | CuKα (λ = 1.54184)                                            | MoKα (λ = 0.71073)                                                             | CuKα (λ = 1.54184)                                                          |
| 2θ range for data collection/°              | 10.816 to 142.474                                             | 6.4 to 49.406                                                                  | 6.866 to 142.48                                                             |
| Index ranges                                | -9 ≤ h ≤ 9, -15 ≤ k ≤ 15, -13 ≤ l ≤ 17                        | 13 ≤ h ≤ 13, -8 ≤ k ≤ 8, -14 ≤ l ≤ 14                                          | -15 ≤ h ≤ 11, -9 ≤ k ≤ 8, -38 ≤ l ≤ 40                                      |
| Reflections collected                       | 21563                                                         | 21372                                                                          | 27986                                                                       |
| Independent reflections                     | 2066 [R <sub>int</sub> = 0.0585, R <sub>sigma</sub> = 0.0182] | 3544 [R <sub>int</sub> = 0.0731, R <sub>sigma</sub> = 0.0449]                  | 5280 [R <sub>int</sub> = 0.0609, R <sub>sigma</sub> = 0.0336]               |
| Data/restraints/parameters                  | 2066/0/119                                                    | 3544/1/255                                                                     | 5280/0/296                                                                  |
| Goodness-of-fit on F <sup>2</sup>           | 1.083                                                         | 1.045                                                                          | 1.062                                                                       |
| Final R indexes [I >= 2σ (I)]               | R <sub>1</sub> = 0.0273, wR <sub>2</sub> = 0.0754             | R <sub>1</sub> = 0.0275, wR <sub>2</sub> = 0.0579                              | R <sub>1</sub> = 0.0364, wR <sub>2</sub> = 0.1048                           |
| Final R indexes [all data]                  | R <sub>1</sub> = 0.0275, wR <sub>2</sub> = 0.0757             | R <sub>1</sub> = 0.0300, wR <sub>2</sub> = 0.0596                              | R <sub>1</sub> = 0.0404, wR <sub>2</sub> = 0.1082                           |
| Largest diff. peak/hole / e Å <sup>-3</sup> | 1.33/-1.01                                                    | 0.37/-0.34                                                                     | 2.25/-1.54                                                                  |

Table S2. Crystallographic data for **4b** and **5b**

| Identification code | <b>Complex 4b</b>                                 | <b>Complex 5b</b>                                                                 |
|---------------------|---------------------------------------------------|-----------------------------------------------------------------------------------|
| Empirical formula   | C <sub>22</sub> H <sub>24</sub> AuIN <sub>4</sub> | C <sub>20</sub> H <sub>34</sub> Au <sub>2</sub> Br <sub>2</sub> N <sub>12</sub> O |
| Formula weight      | 668.32                                            | 1012.34                                                                           |
| Temperature/K       | 150(2)                                            | 150(2)                                                                            |
| Crystal system      | monoclinic                                        | triclinic                                                                         |

|                                             |                                                                  |                                                                  |
|---------------------------------------------|------------------------------------------------------------------|------------------------------------------------------------------|
| Space group                                 | P2 <sub>1</sub> /n                                               | P-1                                                              |
| a/Å                                         | 9.89520(10)                                                      | 9.54745(7)                                                       |
| b/Å                                         | 17.19070(10)                                                     | 9.97551(6)                                                       |
| c/Å                                         | 13.18180(10)                                                     | 17.05412(8)                                                      |
| α/°                                         | 90                                                               | 99.8735(4)                                                       |
| β/°                                         | 90.2300(10)                                                      | 90.4278(5)                                                       |
| γ/°                                         | 90                                                               | 112.6243(6)                                                      |
| Volume/Å <sup>3</sup>                       | 2242.28(3)                                                       | 1472.226(16)                                                     |
| Z                                           | 4                                                                | 2                                                                |
| ρ <sub>calc</sub> /cm <sup>3</sup>          | 1.980                                                            | 2.284                                                            |
| μ/mm <sup>-1</sup>                          | 23.242                                                           | 21.953                                                           |
| F(000)                                      | 1264.0                                                           | 948.0                                                            |
| Crystal size/mm <sup>3</sup>                | 0.05 × 0.04 × 0.04                                               | 0.06 × 0.02 × 0.02                                               |
| Radiation                                   | CuKα (λ = 1.54184)                                               | CuKα (λ = 1.54184)                                               |
| 2θ range for data collection/°              | 8.452 to 129.486                                                 | 9.782 to 130.164                                                 |
| Index ranges                                | -11 ≤ h ≤ 11, -19 ≤ k ≤ 20,<br>15 ≤ l ≤ 15                       | -11 ≤ h ≤ 11, -11 ≤ k ≤ 11, -19 ≤ l<br>≤ 20                      |
| Reflections collected                       | 16824                                                            | 26139                                                            |
| Independent reflections                     | 3783 [R <sub>int</sub> = 0.0278, R <sub>sigma</sub> =<br>0.0197] | 5012 [R <sub>int</sub> = 0.0522, R <sub>sigma</sub> =<br>0.0227] |
| Data/restraints/parameters                  | 3783/0/255                                                       | 5012/2/347                                                       |
| Goodness-of-fit on F <sup>2</sup>           | 1.079                                                            | 1.188                                                            |
| Final R indexes [I > 2σ (I)]                | R <sub>1</sub> = 0.0182, wR <sub>2</sub> = 0.0455                | R <sub>1</sub> = 0.0334, wR <sub>2</sub> = 0.0876                |
| Final R indexes [all data]                  | R <sub>1</sub> = 0.0191, wR <sub>2</sub> = 0.0460                | R <sub>1</sub> = 0.0335, wR <sub>2</sub> = 0.0876                |
| Largest diff. peak/hole / e Å <sup>-3</sup> | 0.62/-0.93                                                       | 2.68/-2.26                                                       |

### Antibacterial Activity of the imidazolium and triazolium salts.

Table S3. Minimum Inhibitory Concentration (MIC μg·mL<sup>-1</sup>) values of the imidazolium and 1,2,4-triazolium precursor pro-ligand salts.

| Compound                                                              | Gram-positive                  |                               | Gram-negative                    |                             |
|-----------------------------------------------------------------------|--------------------------------|-------------------------------|----------------------------------|-----------------------------|
|                                                                       | <i>E. faecium</i> <sup>a</sup> | <i>S. aureus</i> <sup>b</sup> | <i>A. baumannii</i> <sup>c</sup> | <i>E. coli</i> <sup>d</sup> |
| <b>1c</b> <sub>Im</sub> , (R <sub>1</sub> = Ph, R <sub>2</sub> = Me)  | >128                           | >128                          | >128                             | >128                        |
| <b>1d</b> <sub>Im</sub> , (R <sub>1</sub> = Ph, R <sub>2</sub> = Et)  | >128                           | >128                          | >128                             | >128                        |
| <b>1e</b> <sub>trz</sub> , (R <sub>1</sub> = Ph, R <sub>2</sub> = Me) | >128                           | >128                          | 128                              | >128                        |

|                                                                       |      |      |      |      |
|-----------------------------------------------------------------------|------|------|------|------|
| <b>1f</b> <sub>trz</sub> , (R <sub>1</sub> = Ph, R <sub>2</sub> = Et) | >128 | >128 | >128 | >128 |
| <b>1k</b> <sub>Im</sub> , (R <sub>1</sub> = R <sub>2</sub> = Me)      | >128 | >128 | >128 | >128 |
| <b>1l</b> <sub>Im</sub> , (R <sub>1</sub> = R <sub>2</sub> = Et)      | >128 | >128 | >128 | >128 |
| <b>1m</b> <sub>trz</sub> , (R <sub>1</sub> = R <sub>2</sub> = Me)     | >128 | >128 | >128 | >128 |
| <b>1n</b> <sub>trz</sub> , (R <sub>1</sub> = R <sub>2</sub> = Et)     | >128 | >128 | >128 | >128 |
| <b>2a</b> <sub>Bis-im</sub> , (R <sub>1</sub> = Et, n = 2)            | >128 | >128 | >128 | >128 |
| <b>2b</b> <sub>Bis-trz</sub> , (R <sub>1</sub> = Et, n = 2)           | >128 | >128 | >128 | >128 |

<sup>a</sup>*E. faecium* ATCC® BAA-2127, <sup>b</sup>*S. aureus* ATCC® 9144<sup>TM</sup>, <sup>c</sup>*A. baumannii* ATCC® 17978<sup>TM</sup>, and <sup>d</sup>*E. coli* ATCC® BAA-2340<sup>TM</sup>

## Synthesis

### General Details

All reagents were purchased from Sigma-Aldrich, Alfa Aesar or Chem Supply and were of analytical grade or higher and were used without further purification unless otherwise stated. 400 and 500 MHz NMR spectrometers were employed to record <sup>1</sup>H and <sup>13</sup>C-NMR spectra. Chemical shifts (δ) are displayed in parts per million (ppm) referenced to residual solvent signals CDCl<sub>3</sub> (δ<sub>H</sub> = 7.26 and δ<sub>C</sub> = 77.16 ppm) and DMSO-*d*<sub>6</sub> (δ<sub>H</sub> = 2.50 and δ<sub>C</sub> = 39.52 ppm). <sup>1</sup>H-NMR spectroscopic data are reported in the order of multiplicity, which is characterized as s (singlet), d (doublet), t (triplet), q (quartet), m (multiplet) and br (broad), coupling constant (J) in hertz (Hz) and number of protons.

**1a.** Compound **1a** was synthesised following a modified literature procedure.<sup>1</sup> To a solution of imidazole (3.00 g, 44.06 mmol) and bromobenzene (5.07 mL, 48.00 mmol) in degassed DMSO (30 mL), potassium carbonate (12.00 g, 88.12 mmol), CuI (0.84 g, 4.41 mmol) and proline (0.50 g, 4.41 mmol) were added under nitrogen atmosphere and this mixture was stirred at 120 °C for 48 h. The resultant mixture was then cooled to RT and diluted with water followed by extraction with ethyl acetate (3 × 50 mL). The combined organic layers were washed with brine (30 mL) followed by drying over anhydrous MgSO<sub>4</sub>. The crude product was purified via column chromatography to obtain a yellow liquid. Yield: 2.93 g, 46%. <sup>1</sup>H-NMR (500.14 MHz, CDCl<sub>3</sub>) δ 7.79 (s, 1H, C2-*H*<sub>im</sub>), 7.43 – 7.40 (m, 2H, *H*<sub>aryl</sub>), 7.32 – 7.29 (m, 3H, *H*<sub>aryl</sub>), 7.22 (s, 1H, C5-*H*<sub>im</sub>), 7.15 (s, 1H, C4-*H*<sub>im</sub>) <sup>13</sup>C-NMR (125.77 MHz, CDCl<sub>3</sub>) δ 136.3 (C<sub>q</sub>), 134.5 (C2<sub>im</sub>), 129.4 (C4<sub>im</sub>), 128.8 (C<sub>aryl</sub>), 126.4 (C<sub>aryl</sub>), 120.4 (C<sub>aryl</sub>), 117.2 (C5<sub>im</sub>) HRESI-MS: [C<sub>9</sub>H<sub>8</sub>N<sub>2</sub><sup>+</sup>] *m/z* = 145.0705 calcd. = 145.0760.



**1b.** This compound was prepared using the same method for **1a** from 1,2,4-triazole (1.00 g, 43.50 mmol) bromobenzene (5.0 mL, 47.80 mmol) potassium carbonate (12.00 g, 86.88 mmol), CuI (0.83 g, 4.34 mmol), and proline (0.50 g, 4.34 mmol). Volatiles were removed under reduced pressure producing a yellow crystalline solid. Yield: 3.48 g, 55%. <sup>1</sup>H-NMR (400.13 MHz, DMSO-*d*<sub>6</sub>) δ 9.31 (s, 1H, C5-*H*<sub>trz</sub>), 8.25 (s, 1H, C3-*H*<sub>trz</sub>), 7.88 – 7.86 (m, 2H, H<sub>aryl</sub>), 7.59 – 7.55 (m, 2H, H<sub>aryl</sub>), 7.44 – 7.40 (m, 1H, H<sub>aryl</sub>). <sup>13</sup>C-NMR (125.77 MHz, DMSO-*d*<sub>6</sub>) δ 152.9 (C5<sub>trz</sub>), 142.8 (C3<sub>trz</sub>), 137.2 (C<sub>q</sub>), 130.2 (C<sub>aryl</sub>), 128.3 (C<sub>aryl</sub>), 119.9 (C<sub>aryl</sub>). HRESI-MS: [C<sub>8</sub>H<sub>7</sub>N<sub>3</sub><sup>+</sup>] *m/z* = 146.0704 calcd. = 146.0704.

**1c.** To a solution of 1-phenyl-1*H*-imidazole (**1a**) (0.20 g, 1.38 mmol) in acetonitrile was added iodomethane (0.12 mL, 1.94 mmol). The resulting mixture was heated under reflux for 24 h and then cooled to RT and volatiles were removed under reduced pressure producing a yellow oil. The crude product was recrystallised with acetonitrile and ether producing a crystalline white powder. Yield: 0.26 g, 65%. <sup>1</sup>H-NMR (400.13 MHz, CDCl<sub>3</sub>) δ 10.15 (s, 1H, C2-*H*<sub>im</sub>), 7.79 (s, 1H, C4-*H*<sub>im</sub>), 7.75 (s, 1H, C5-*H*<sub>im</sub>), 7.71 – 7.69 (m, 2H, H<sub>aryl</sub>), 7.50 – 7.42 (m, 3H, H<sub>aryl</sub>), 4.17 (s, 3H, CH<sub>3</sub>). <sup>13</sup>C-NMR (125.77 MHz, DMSO-*d*<sub>6</sub>) δ 136.4 (C2<sub>im</sub>), 135.2 (C<sub>q</sub>), 130.7 (C<sub>aryl</sub>), 130.2 (C<sub>aryl</sub>), 124.9 (C<sub>im</sub>), 122.3 (C<sub>aryl</sub>), 121.5 (C<sub>im</sub>), 36.7 (CH<sub>3</sub>). HRESI-MS: [C<sub>10</sub>H<sub>11</sub>N<sub>2</sub><sup>+</sup>] *m/z* = 159.0926 calcd. = 159.0917.

**1d.** This compound was prepared using the same method as **1c** from **1a** (0.60 g, 4.16 mmol), and iodoethane (0.40 mL, 5.00 mmol) yielding a light brown powder. Yield: 0.95 g, 76%. <sup>1</sup>H-NMR (400.13 MHz, CDCl<sub>3</sub>) δ 10.29 (s, 1H, C2-*H*<sub>im</sub>), 7.84 (s, 1H, C4-*H*<sub>im</sub>), 7.77 (s, 1H, C5-*H*<sub>im</sub>), 7.71-7.69 (m, 2H, H<sub>aryl</sub>), 7.44-7.37 (m, 3H, H<sub>aryl</sub>), 4.52 (q, *J* = 8.0 Hz, 2H, CH<sub>2</sub>CH<sub>3</sub>), 1.55 (t, *J* = 8.0 Hz, 3H, CH<sub>2</sub>CH<sub>3</sub>). <sup>13</sup>C-NMR (125.77 MHz, DMSO-*d*<sub>6</sub>) δ 135.6 (C2<sub>im</sub>), 135.3 (C<sub>q</sub>), 130.6 (C<sub>aryl</sub>), 130.2 (C<sub>aryl</sub>), 123.5 (C<sub>im</sub>), 122.4 (C<sub>aryl</sub>), 121.6 (C<sub>im</sub>), 45.3 (CH<sub>2</sub>CH<sub>3</sub>), 15.3 (CH<sub>2</sub>CH<sub>3</sub>). HRESI-MS: [C<sub>11</sub>H<sub>13</sub>N<sub>2</sub><sup>+</sup>] *m/z* = 173.1089 calcd. = 173.1073.

**1e** was prepared using the same method as **1c** from **1b** (0.60 g, 4.13 mmol) and iodomethane (0.36 mL, 5.79 mmol) yielding a white powder. Yield: 0.95 g, 80%. <sup>1</sup>H-NMR (400.13 MHz, CDCl<sub>3</sub>) δ 11.57 (s, 1H, C5-*H*<sub>trz</sub>), 9.17 (s, 1H, C3-*H*<sub>trz</sub>), 7.96 – 7.92 (m, 2H, H<sub>aryl</sub>), 7.55 – 7.47 (m, 3H, H<sub>aryl</sub>), 4.33 (s, 3H, CH<sub>3</sub>). <sup>13</sup>C-NMR (125.77 MHz, CDCl<sub>3</sub>) δ 145.2 (C5<sub>trz</sub>), 140.8 (C3<sub>trz</sub>), 134.7 (C<sub>q</sub>), 130.9 (C<sub>aryl</sub>), 130.3 (C<sub>aryl</sub>), 120.8 (C<sub>aryl</sub>), 36.1 (CH<sub>3</sub>). HRESI-MS: [C<sub>9</sub>H<sub>10</sub>N<sub>3</sub><sup>+</sup>] *m/z* = 160.0868, calcd. = 160.0869.

**1f** was prepared using the same methods as **1c** from **1b** (0.60 g, 4.13 mmol) and iodoethane (0.47 mL, 5.79 mmol) to give **1f** as a crystalline white powder. Yield: 1.05 g, 84%. <sup>1</sup>H-NMR (400.13 MHz,

$\text{CDCl}_3$ )  $\delta$  11.84 (s, 1H, C5- $H_{trz}$ ), 9.13 (s, 1H, C3- $H_{trz}$ ), 8.06 – 8.02 (m, 2H,  $H_{aryl}$ ), 7.58 – 7.50 (m, 3H,  $H_{aryl}$ ), 4.78 (q,  $J = 7.4$  Hz, 2H,  $\text{CH}_2\text{CH}_3$ ), 1.74 (t,  $J = 7.4$  Hz, 3H,  $\text{CH}_2\text{CH}_3$ ).  $^{13}\text{C}$ -NMR (125.77 MHz,  $\text{CDCl}_3$ )  $\delta$  143.9 (C5- $trz$ ), 140.2 (C3- $trz$ ), 134.8 (C $_q$ ), 131.0 (C $_{aryl}$ ), 130.3 (C $_{aryl}$ ), 120.7 (C $_{aryl}$ ), 45.0 ( $\text{CH}_2\text{CH}_3$ ), 15.7 ( $\text{CH}_2\text{CH}_3$ ). HRESI-MS:  $[\text{C}_{10}\text{H}_{12}\text{N}_3^+]$   $m/z = 174.1024$  calcd. = 174.1026.

**1g** and **1k**. A mixture of imidazole (2.00 g, 29.37 mmol), iodomethane (3.65 mL, 58.74 mmol) and potassium carbonate (4.06 g, 29.37 mmol) in acetone (30 mL) was stirred at RT for 24 h. The reaction mixture was filtered and volatiles were removed under reduced pressure producing an off-white powder. The crude product was redissolved in acetone (10 mL) followed by the addition of ethyl acetate (15 mL) to obtain a white powder **1k** that was collected and washed with ethyl acetate. The solvent of the filtrate was removed under reduced pressure to yield mono-alkylated product **1g** as a yellow oil. **1g**: Yield: 0.86 g, 36%.  $^1\text{H}$ -NMR (400.13 MHz,  $\text{DMSO-}d_6$ )  $\delta$  7.58 (s, 1H, C2- $H_{im}$ ), 7.10 (s, 1H, C5- $H_{im}$ ), 6.92 (s, 1H, C4- $H_{im}$ ) 3.64 (s, 3H, N3- $\text{CH}_3$ ).  $^{13}\text{C}$ -NMR (125.77 MHz,  $\text{DMSO-}d_6$ )  $\delta$  138.3 (C2- $im$ ), 128.9 (C5- $im$ ), 120.9 (C4- $im$ ) 33.1 ( $\text{CH}_3$ ). **1k**: (Yield: 1.84 g, 27%).  $^1\text{H}$ -NMR (400.13 MHz,  $\text{DMSO-}d_6$ )  $\delta$  9.06 (s, 1H, C2- $H_{im}$ ), 7.69 (m, 2H,  $H_{im}$ ), 3.85 (s, 6H, N1- $\text{CH}_3$ , N3- $\text{CH}_3$ ).  $^{13}\text{C}$ -NMR (100.62 MHz,  $\text{DMSO-}d_6$ )  $\delta$  137.5 (C2- $im$ ), 123.9 (C4- $im$ , C5- $im$ ), 36.2 ( $\text{CH}_3$ ). HRESI-MS:  $[\text{C}_5\text{H}_9\text{N}_2^+]$   $m/z = 97.0760$  calcd. = 97.0741.

**1h** and **1l**. These compounds were prepared using the same methods as **1g** and **1k** from imidazole (2 g, 29.37 mmol), iodoethane (4.72 mL, 58.74 mmol), and potassium carbonate (4.06 g, 29.37 mmol), yielding **1h** as a yellow oil, and **1l** as a white crystalline powder. **1h**: Yield: 0.59 g, 21%.  $^1\text{H}$ -NMR (400.13 MHz,  $\text{DMSO-}d_6$ )  $\delta$  7.64 (s, 1H, C2-  $H_{im}$ ), 7.17 (s, 1H, C4- $H_{im}$ ), 6.90 (s, C5- $H_{im}$ ), 3.97 (q,  $J = 7.3$ , 2,  $\text{CH}_2\text{CH}_3$ ), 1.32 (t,  $J = 7.3$ , 3H,  $\text{CH}_2\text{CH}_3$ ).  $^{13}\text{C}$ -NMR (125.77 MHz,  $\text{DMSO-}d_6$ )  $\delta$  137.2 (C2- $im$ ), 128.7 (C5- $im$ ), 119.3 (C4- $im$ ) 41.4 ( $\text{CH}_2\text{CH}_3$ ) 16.7 ( $\text{CH}_2\text{CH}_3$ ). **1l**: Yield: 1.42 g, 19%.  $^1\text{H}$ -NMR (400.13 MHz,  $\text{DMSO-}d_6$ )  $\delta$  9.25 (s, 1H, C2- $H_{im}$ ), 7.82 (s, 2H  $H_{im}$ ), 4.20 (q,  $J = 7.3$ , 4H,  $\text{CH}_2\text{CH}_3$ ), 1.45 – 1.40 (m, 6H,  $\text{CH}_2\text{CH}_3$ ).  $^{13}\text{C}$ -NMR (125.77 MHz,  $\text{DMSO-}d_6$ )  $\delta$  135.9 (C2- $im$ ), 122.5 (C4- $im$ , C5- $im$ ), 44.7 ( $\text{CH}_2\text{CH}_3$ ), 15.5 ( $\text{CH}_2\text{CH}_3$ ). HRESI-MS:  $[\text{C}_7\text{H}_{13}\text{N}_2^+]$   $m/z = 126.1077$  calcd. = 126.3031.

**1i** and **1m**. These compounds were prepared using the same methods as **1g** and **1k** from 1,2,4-triazole (2.00 g, 28.96 mmol), iodomethane (3.61 mL, 57.92 mmol), and potassium carbonate (4 g, 28.98 mmol) yielding **1i** as a yellow oil, and **1m** as a white crystalline powder. **1i**: Yield: 0.87 g, 36%.  $^1\text{H}$ -NMR (400.13 MHz,  $\text{DMSO-}d_6$ )  $\delta$  8.45 (s, 1H, C5- $H_{trz}$ ), 7.94 (s, 1H, C3- $H_{trz}$ ), 3.87 (s, 3H, N1- $\text{CH}_3$ ).  $^{13}\text{C}$ -NMR (125.77 MHz,  $\text{DMSO-}d_6$ )  $\delta$  151.8 (C5- $trz$ ), 144.9 (C3- $trz$ ), 36.1 (N1- $\text{CH}_3$ ). **1m**: Yield: 1.7 g, 26%.  $^1\text{H}$ -NMR (400.13 MHz,  $\text{DMSO-}d_6$ )  $\delta$  9.99 (s, 1H, C5- $H_{trz}$ ), 9.12 (s, 1H, C3- $H_{trz}$ ), 4.07 (s, 3H,

N4-CH<sub>3</sub>), 3.90 (s, 3H, N1-CH<sub>3</sub>). <sup>13</sup>C-NMR (125.77 MHz, DMSO-*d*<sub>6</sub>) δ 145.8 (C5<sub>trz</sub>), 143.8 (C3<sub>trz</sub>), 39.1 (N4-CH<sub>3</sub>), 34.5 (N1-CH<sub>3</sub>). HRESI-MS: [C<sub>4</sub>H<sub>8</sub>N<sub>3</sub><sup>+</sup>] *m/z* = 98.0712 calcd. = 98.0713.

**1j** and **1n**. These compounds were prepared using the same methods as **1g** and **1k** from 1,2,4-triazole (2 g, 29.00 mmol), iodoethane (4.66 mL, 57.91 mmol), and potassium carbonate (7.38 g, 29.00 mmol) yielding **1j** as a yellow oil, and **1n** as a white crystalline powder. **1j**: Yield: 2.15 g, 76%. <sup>1</sup>H-NMR (400.13 MHz, DMSO-*d*<sub>6</sub>) δ 8.50 (s, 1H, C5-*H*<sub>trz</sub>), 7.94 (s, 1H, C3-*H*<sub>trz</sub>), 4.20 (q, *J* = 7.3 Hz, 2H, N1-CH<sub>2</sub>CH<sub>3</sub>), 1.36 (t, *J* = 7.3 Hz, 3H, N1-CH<sub>2</sub>CH<sub>3</sub>). <sup>13</sup>C-NMR (125.77 MHz, DMSO-*d*<sub>6</sub>) δ 151.6 (C5<sub>trz</sub>), 143.7 (C3<sub>trz</sub>), 44.3 (N1-CH<sub>2</sub>CH<sub>3</sub>), 15.4 (N1-CH<sub>2</sub>CH<sub>3</sub>). **1n**: Yield: 1.61 g, 22%. <sup>1</sup>H-NMR (400.13 MHz, DMSO-*d*<sub>6</sub>) δ 10.16 (s, 1H, C5-*H*<sub>trz</sub>), 9.24 (s, 1H, C3-*H*<sub>trz</sub>), 4.39 (q, *J* = 7.3 Hz, 2H, N4-CH<sub>2</sub>CH<sub>3</sub>), 4.28 (q, *J* = 7.3 Hz, 2H, N1-CH<sub>2</sub>CH<sub>3</sub>), 1.47 (t, *J* = 7.3 Hz, 6H, CH<sub>2</sub>CH<sub>3</sub>). <sup>13</sup>C-NMR (125.77 MHz, DMSO-*d*<sub>6</sub>) δ 144.8 (C5<sub>trz</sub>), 142.4 (C3<sub>trz</sub>), 47.6 (N4-CH<sub>2</sub>CH<sub>3</sub>), 43.5 (N1-CH<sub>2</sub>CH<sub>3</sub>), 14.9 (N4-CH<sub>2</sub>CH<sub>3</sub>) 14.1 (N1-CH<sub>2</sub>CH<sub>3</sub>). HRESI-MS: [C<sub>6</sub>H<sub>12</sub>N<sub>3</sub><sup>+</sup>] *m/z* = 126.1023 calcd. = 126.1026.

Compounds **2a** – **2c** were prepared using slightly modified procedures from Zhao and co-workers.<sup>2</sup> **2a**. A mixture of 1-ethyl-imidazole **1h** (200 mg, 2.08 mmol) and dibromoethane (0.18 mL, 4.81 mmol) in acetonitrile (10 mL) was heated at reflux for 24 h. The off-white precipitate was collected followed by washing with acetonitrile and dried under vacuum to obtain the pure product as a white solid. Yield: 264 mg, 67%. <sup>1</sup>H-NMR (400.13 MHz, DMSO-*d*<sub>6</sub>) δ 9.32 (s, 2H, C2-*H*<sub>im</sub>), 7.86 (s, 4H, C4-*H*<sub>im</sub>), 7.71 (s, 4H, C5-*H*<sub>im</sub>), 4.75 (s, 4H, CH<sub>2</sub>CH<sub>2</sub>), 4.21 (q, *J* = 7.3 Hz, 4H, N1-CH<sub>2</sub>CH<sub>3</sub>), 1.41 (t, *J* = 7.3 Hz, N3-CH<sub>2</sub>CH<sub>3</sub>). <sup>13</sup>C-NMR (100.62 MHz, DMSO-*d*<sub>6</sub>) δ 136.9 (C2<sub>im</sub>), 123.0 (C4<sub>im</sub>), 122.9 (C5<sub>im</sub>), 48.9 (C<sub>ethylene</sub>), 44.9 (CH<sub>2</sub>CH<sub>3</sub>), 15.4 (CH<sub>2</sub>CH<sub>3</sub>). HRESI-MS: [C<sub>12</sub>H<sub>20</sub>N<sub>4</sub><sup>2+</sup>] *m/z* = 110.0702 calcd. = 110.0839.

**2b**. In a sealed tube, a mixture of 1-ethyl-1,2,4-triazole **1j** (500 mg, 5.15 mmol) and dibromoethane (0.89 mL, 10.30 mmol) was stirred at 120 °C for 4 h. The resultant solid was collected followed by washing with acetonitrile (10 mL) to obtain the pure product as a white solid. Yield: 226 mg, 23%. <sup>1</sup>H-NMR (400.13 MHz, DMSO-*d*<sub>6</sub>) δ 10.21 (s, 2H, C5-*H*<sub>trz</sub>), 9.19 (s, 2H, C3-*H*<sub>trz</sub>), 4.85 (s, 4H, N4-CH<sub>2</sub>CH<sub>2</sub>), 4.43 (q, *J* = 7.2 Hz, 4H, N1-CH<sub>2</sub>CH<sub>3</sub>), 1.57 – 1.42 (m, 6H, N1-CH<sub>2</sub>CH<sub>3</sub>). <sup>13</sup>C-NMR (125.77 MHz, DMSO-*d*<sub>6</sub>) δ 145.1 (C5<sub>trz</sub>), 143.0 (C3<sub>trz</sub>), 47.8 (C<sub>ethylene</sub>). 47.0 (CH<sub>2</sub>CH<sub>3</sub>), 14.0 (CH<sub>2</sub>CH<sub>3</sub>). HRESI-MS: [C<sub>10</sub>H<sub>18</sub>N<sub>6</sub><sup>2+</sup>] *m/z* = 111.0746 calcd. = 111.0791.

**2c**. This compound was prepared using the same methods as **2b** from **1i** (400 mg, 4.81 mmol), and dibromoethane (0.42 mL, 4.82 mmol), producing a white powder. Yield: 203 mg, 24%. <sup>1</sup>H-NMR

(400.13 MHz, DMSO- $d_6$ )  $\delta$  10.13 (s, 5H C5- $H_{trz}$ ), 9.17 (s, 2H C3- $H_{trz}$ ), 4.85 (s, 4H, N4- $CH_2CH_2$ ), 4.10 (s, 6H,  $CH_3$ ).  $^{13}C$ -NMR (125.77 MHz, DMSO- $d_6$ )  $\delta$  145.1 (C5- $trz$ ), 143.8 (C3- $trz$ ), 47.1 (C- $ethylene$ ) 19.0 (C- $CH_3$ ). HRESI-MS:  $[C_8H_{14}N_6]^{2+}$   $m/z = 97.0756$  calcd. = 97.0635.

### **$^1H$ -NMR and $^{13}C$ -NMR Spectra**

Figure S10.  $^1H$ -NMR spectrum of compound **1a** ( $CDCl_3$ ).

7.79  
7.43  
7.41  
7.40  
7.32  
7.31  
7.31  
7.30  
7.29  
7.22  
7.15

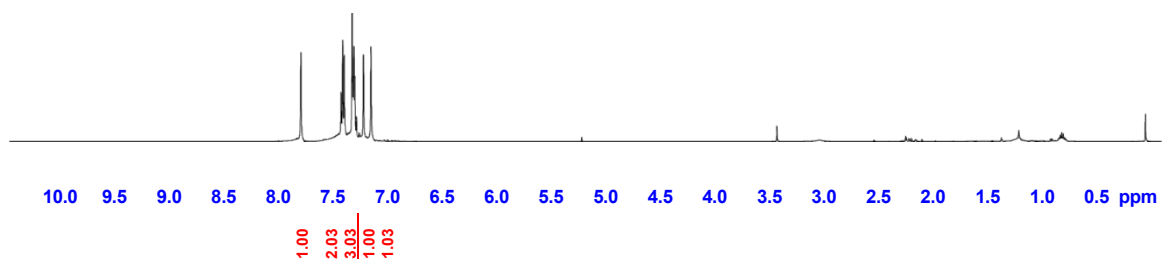

Figure S11.  $^{13}\text{C}$ -NMR spectrum of compound **1a** ( $\text{CDCl}_3$ ).

136.30  
134.52  
129.37  
128.83  
126.42  
120.39  
117.17

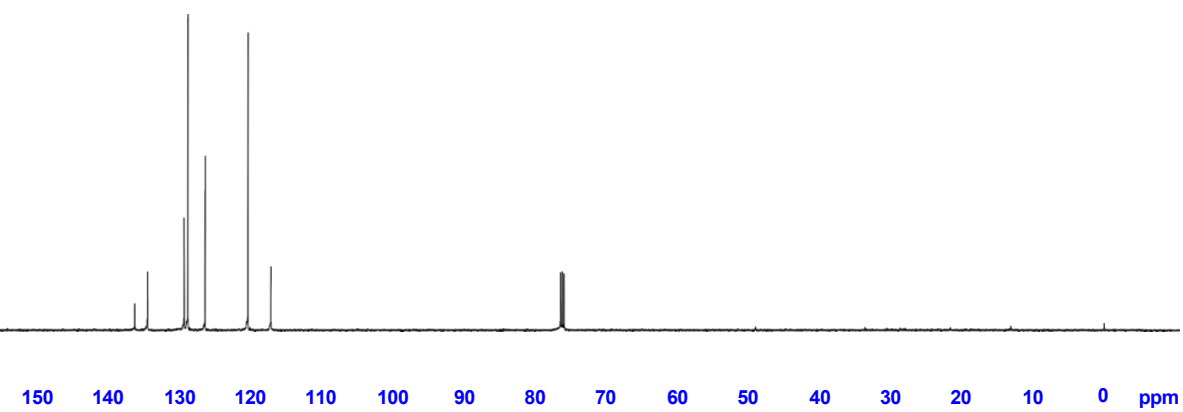

Figure S12.  $^1\text{H}$ -NMR spectrum of compound **1b** ( $\text{DMSO-}d_6$ ).

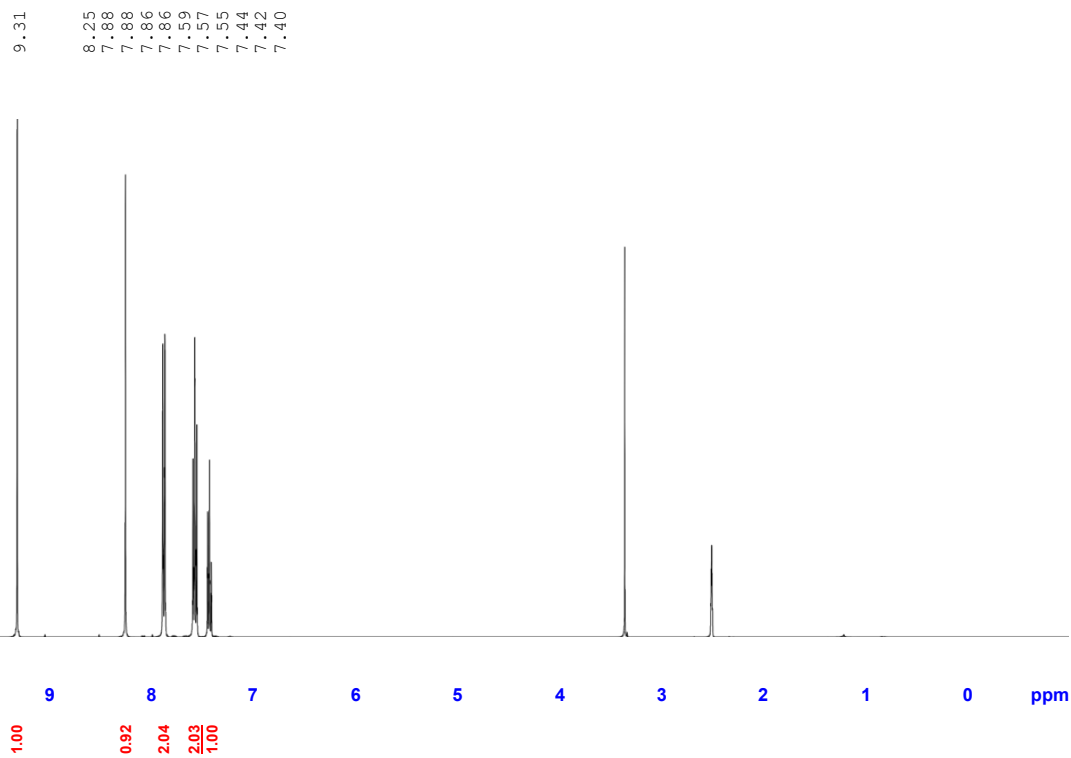

Figure S13.  $^{13}\text{C}$ -NMR spectrum of compound **1b** ( $\text{DMSO-}d_6$ ).

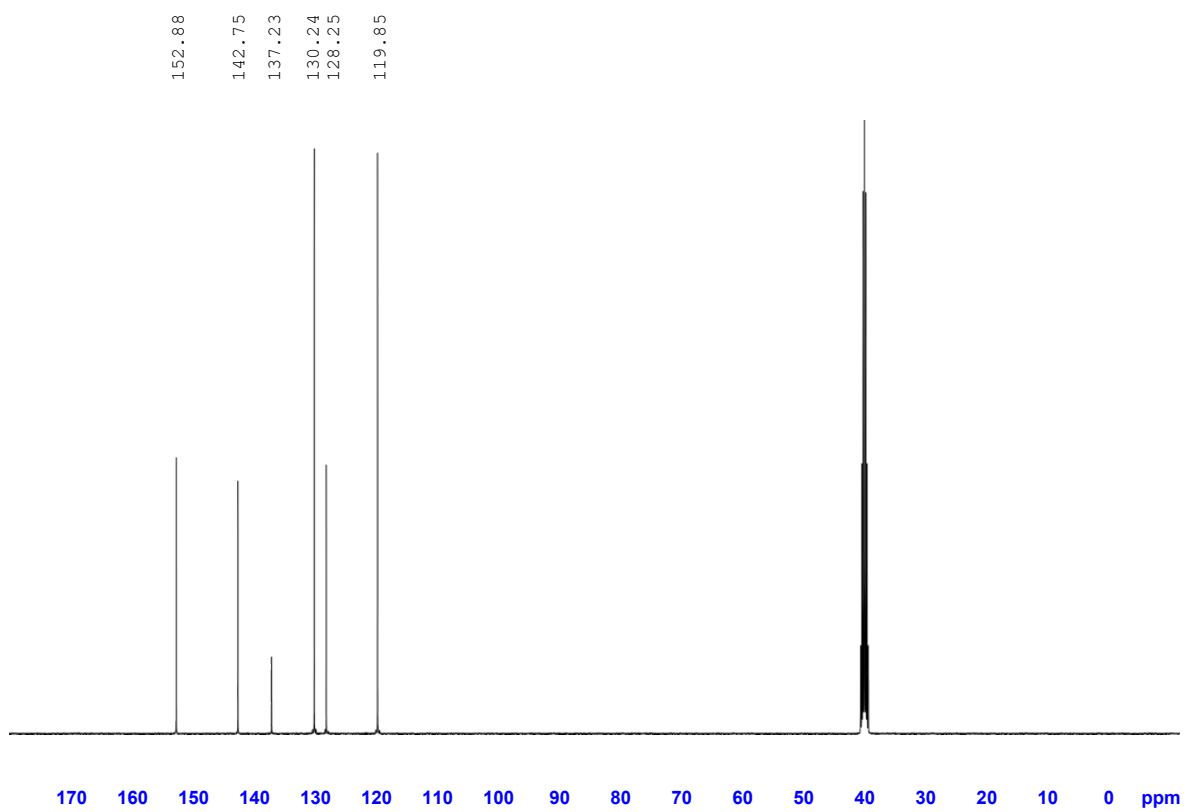



Figure S14. <sup>1</sup>H-NMR spectrum of compound **1c** (CDCl<sub>3</sub>).

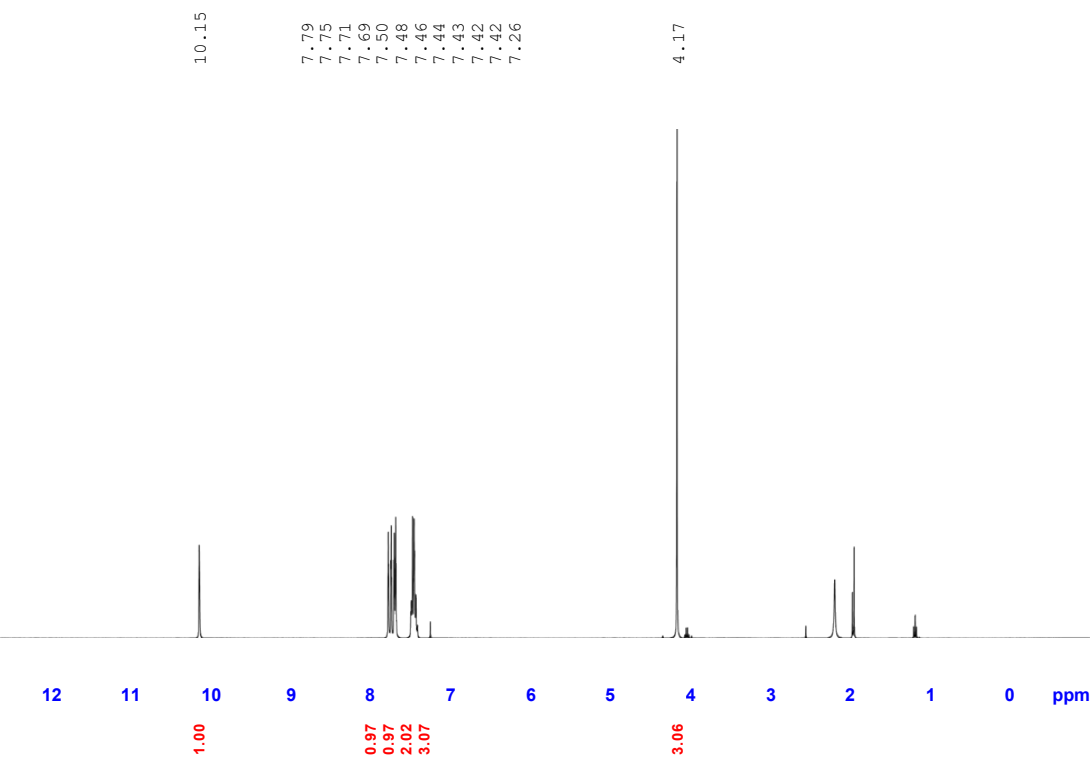

Figure S15.  $^{13}\text{C}$ -NMR spectrum of compound **1c** ( $\text{DMSO-}d_6$ ).

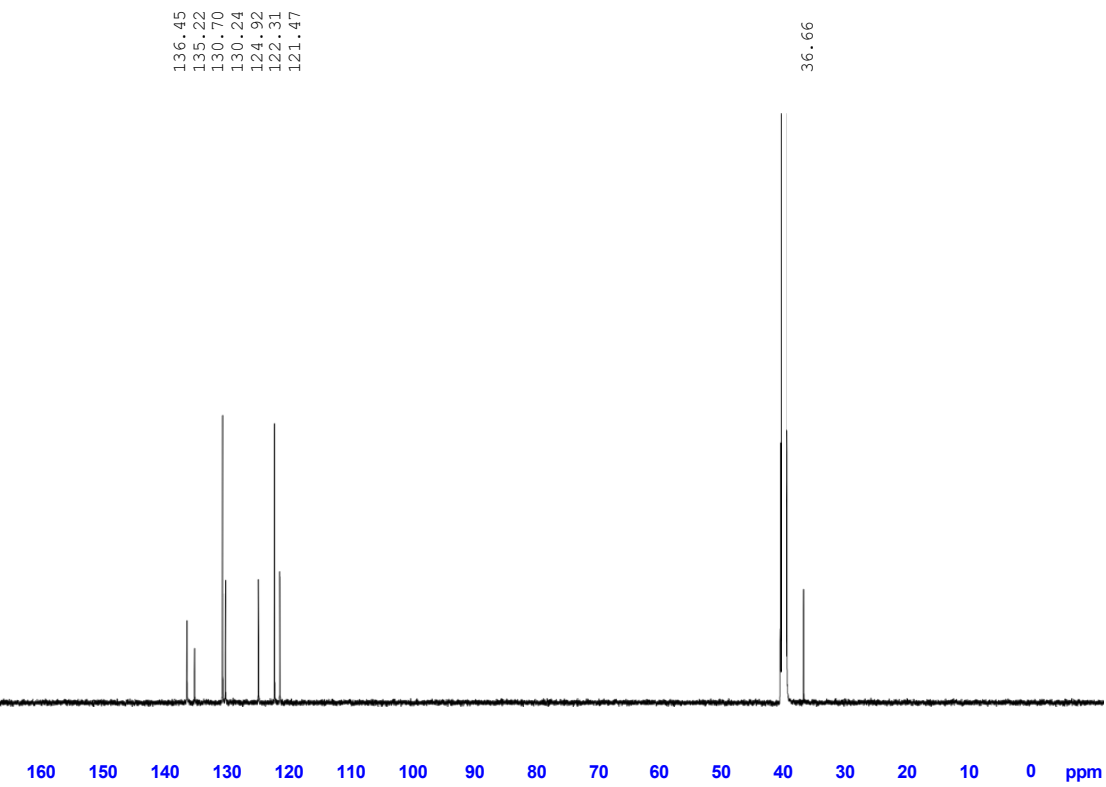

Figure S16.  $^1\text{H}$ -NMR spectrum of compound **1d** ( $\text{CDCl}_3$ ).

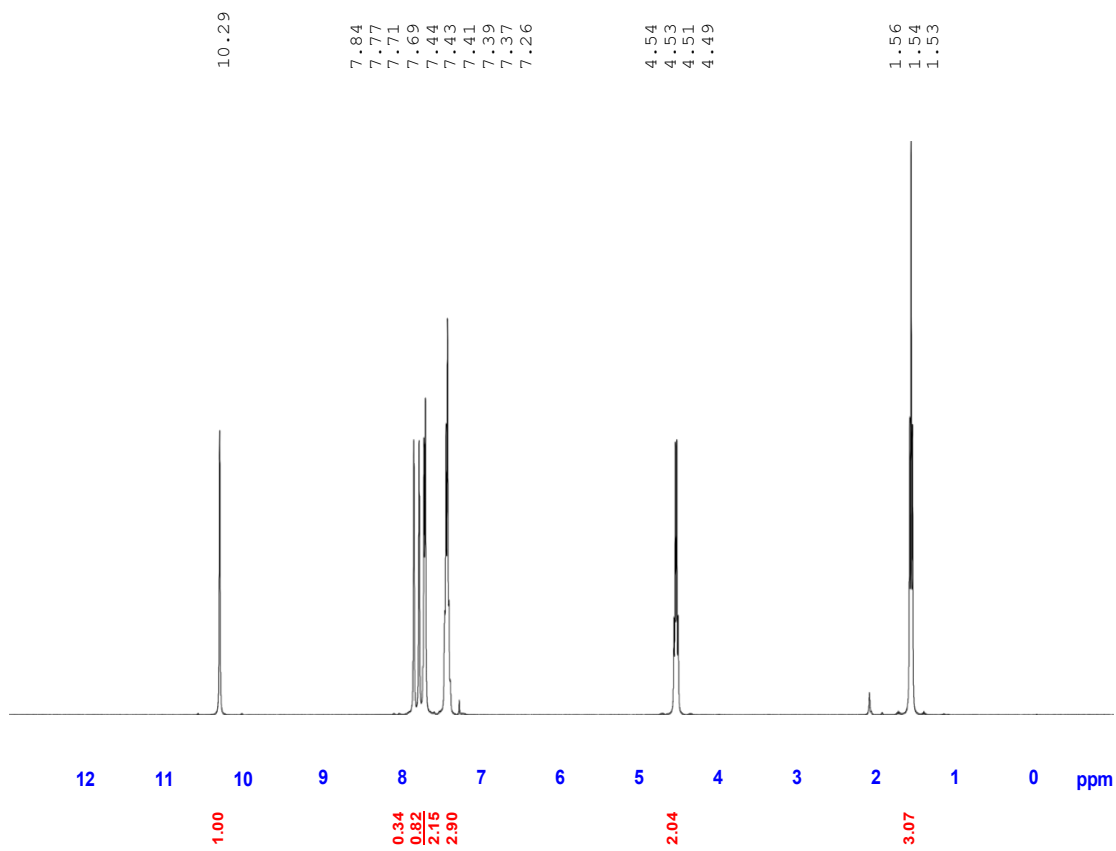

Figure S17.  $^{13}\text{C}$ -NMR spectrum of compound **1d** ( $\text{DMSO}-d_6$ ).

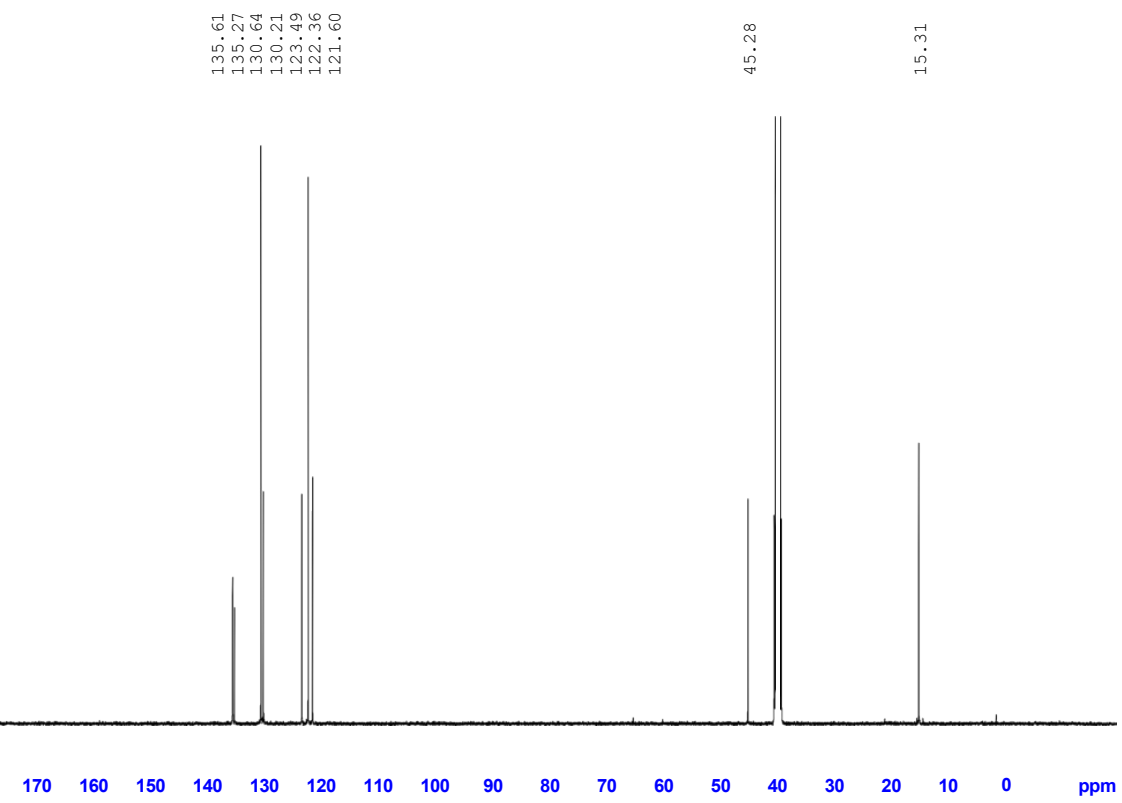

Figure S18. <sup>1</sup>H-NMR spectrum of compound **1e** (CDCl<sub>3</sub>).

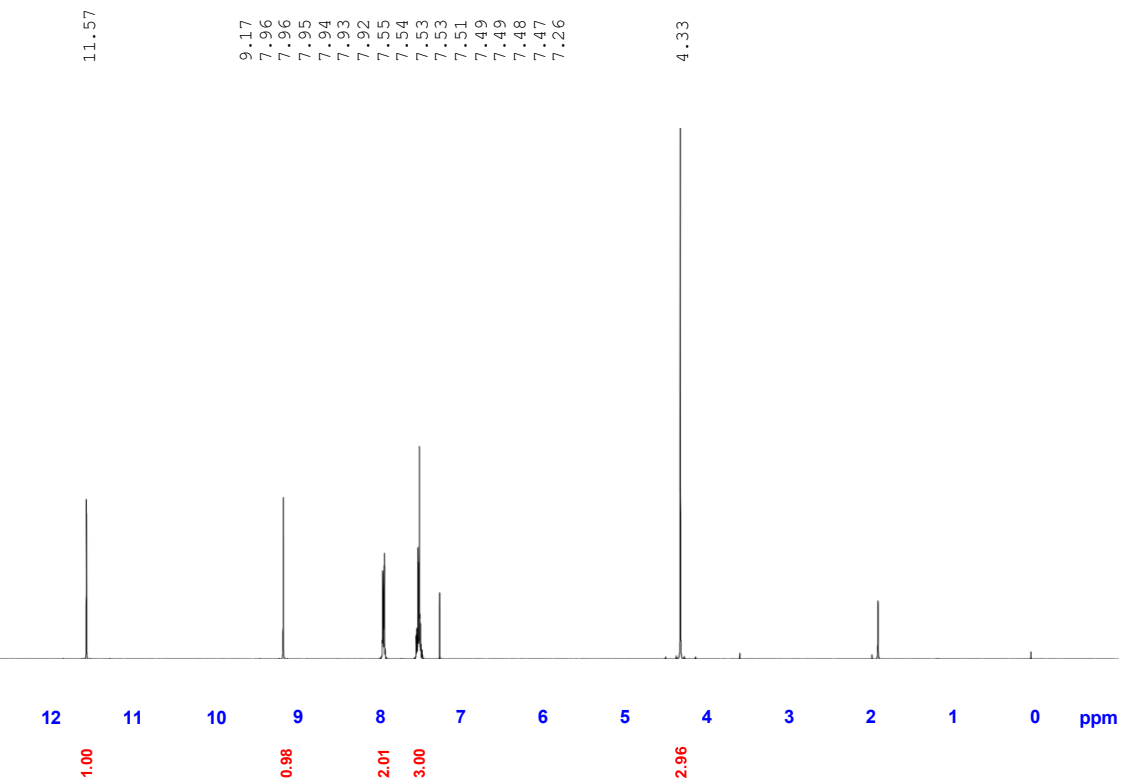

Figure S19.  $^{13}\text{C}$ -NMR spectrum of compound **1e** ( $\text{CDCl}_3$ ).

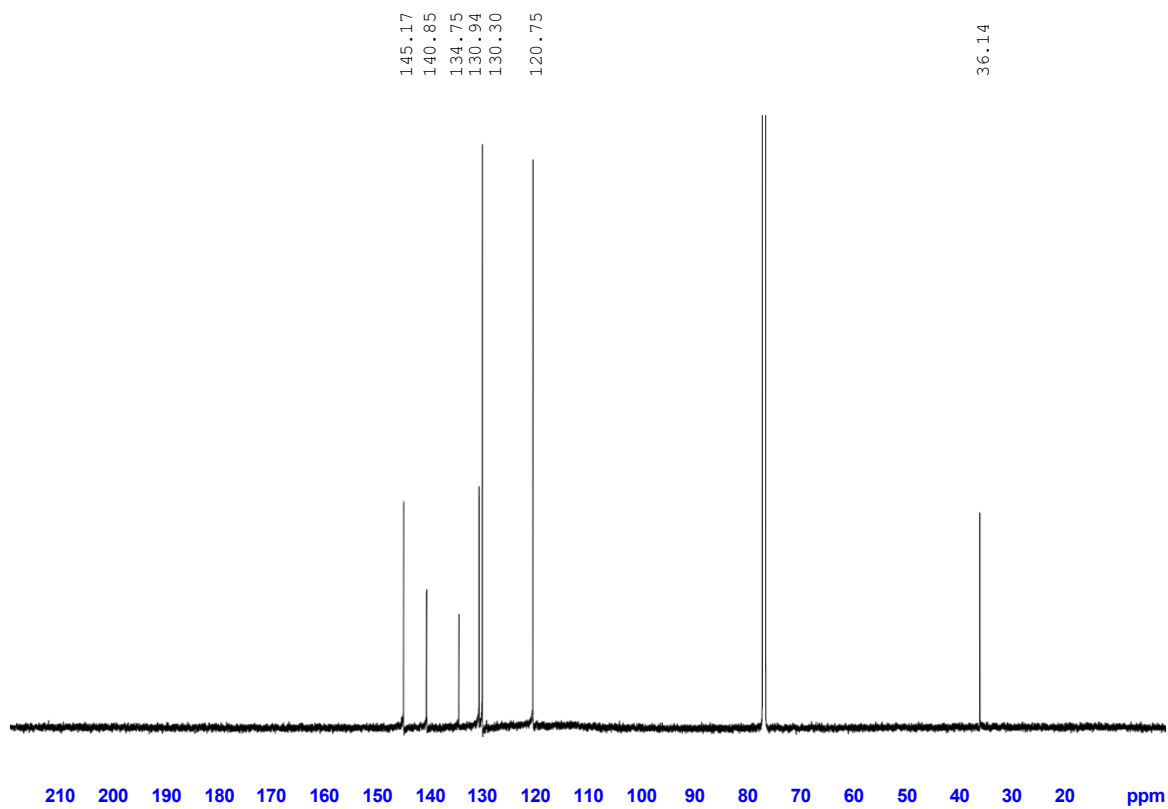

Figure S20. <sup>1</sup>H-NMR spectrum of compound **1f** (CDCl<sub>3</sub>).

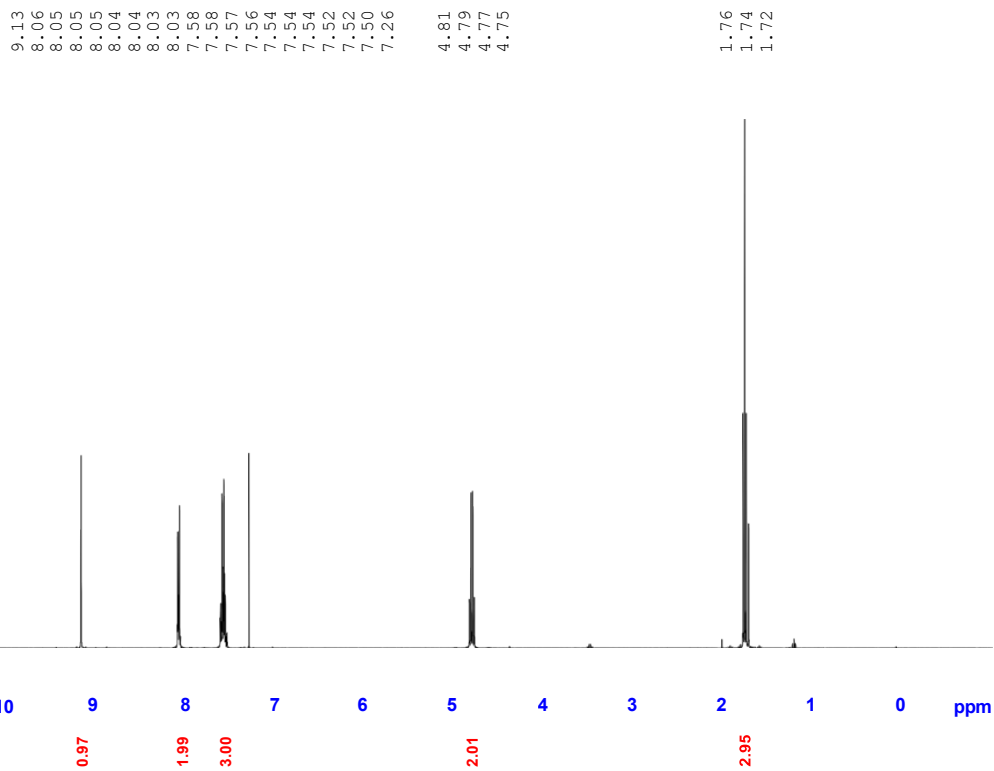

Figure S21. <sup>13</sup>C-NMR spectrum of compound **1f** (CDCl<sub>3</sub>).

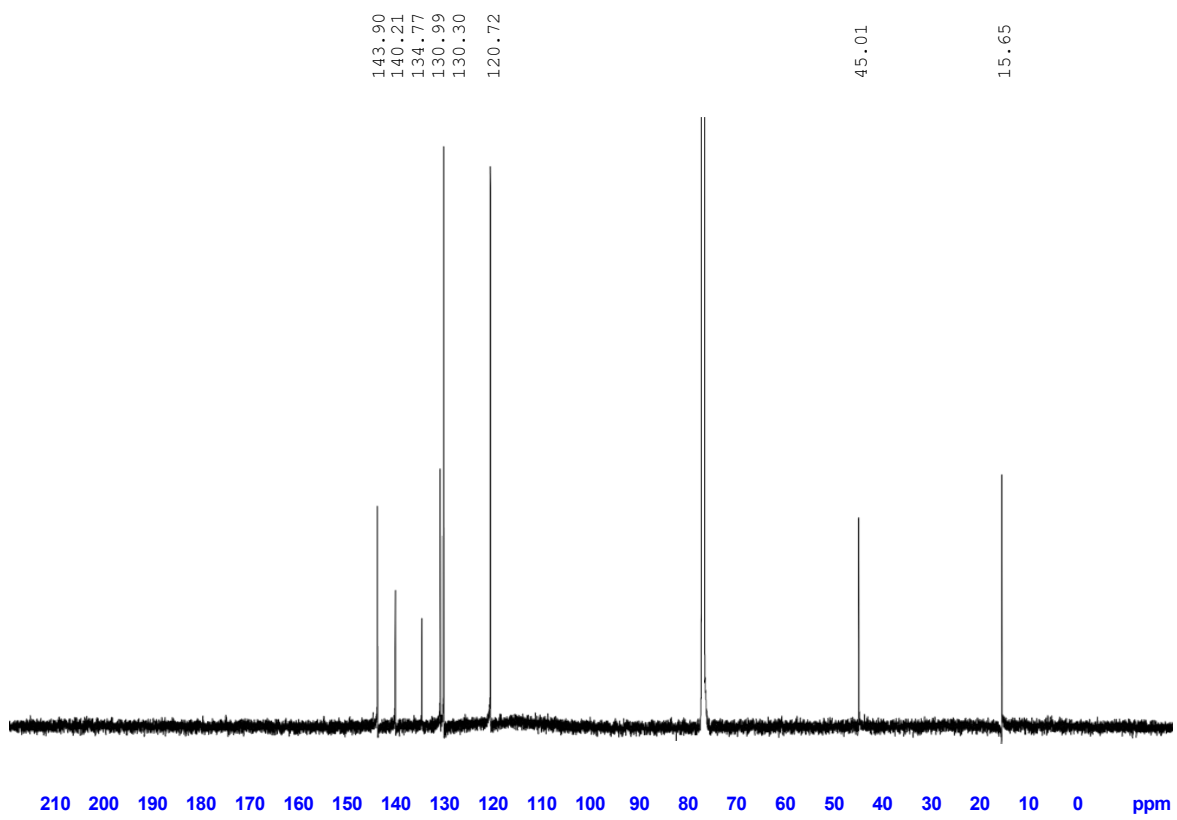



Figure S22.  $^1\text{H}$ -NMR spectrum of compound **1g** ( $\text{DMSO-}d_6$ ).

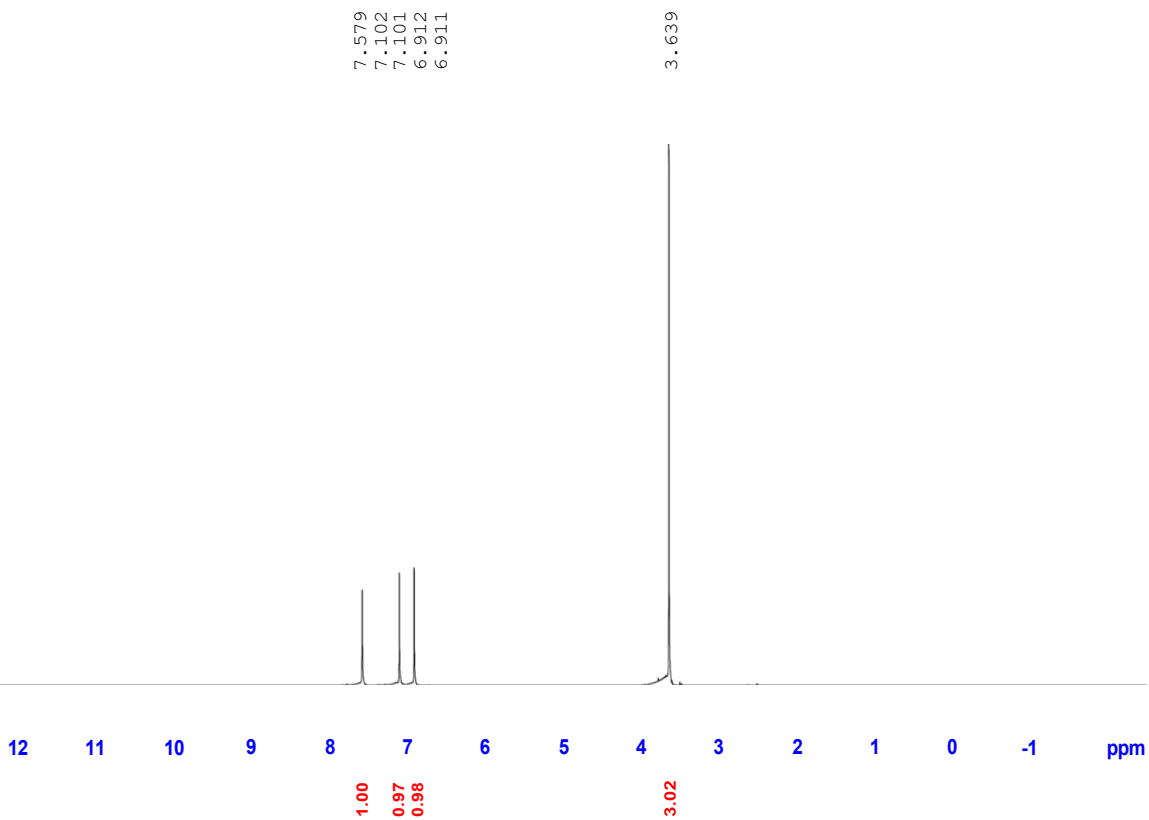

Figure S23.  $^{13}\text{C}$ -NMR spectrum of compound **1g** ( $\text{DMSO-}d_6$ ).

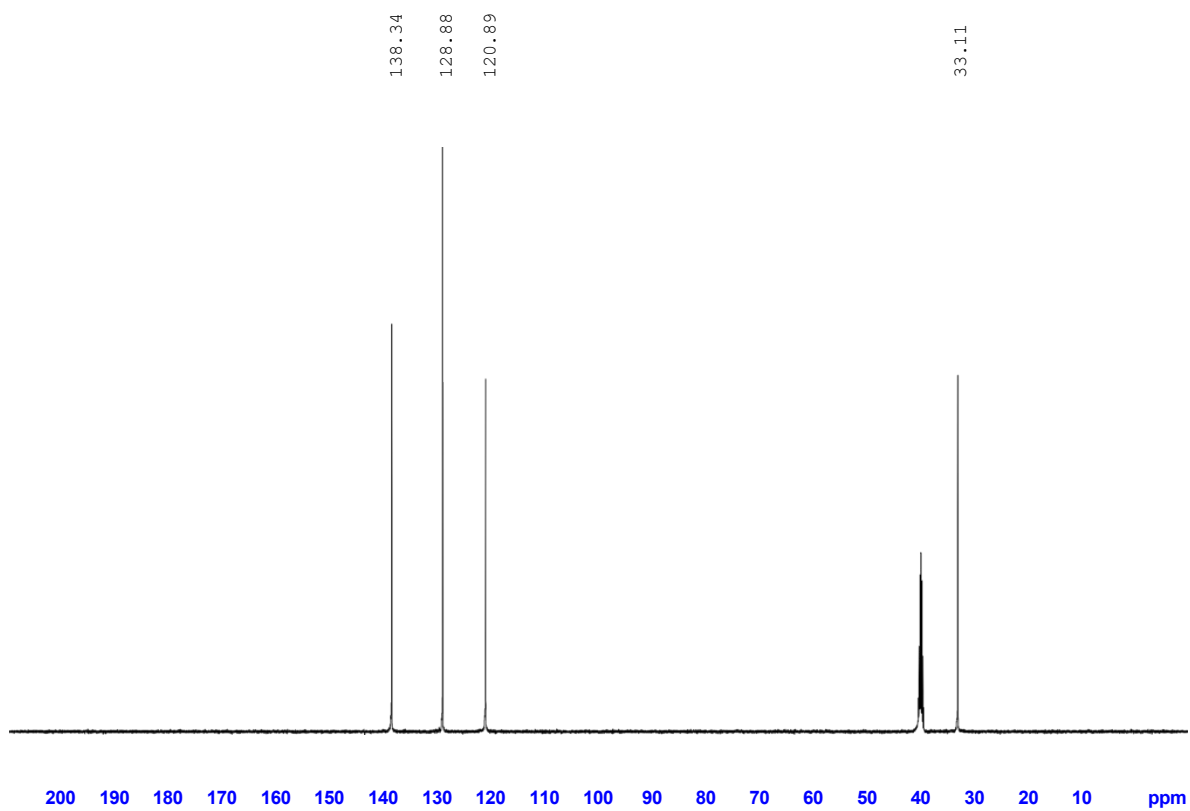

Figure S24.  $^1\text{H}$ -NMR spectrum of compound **1h** ( $\text{DMSO-}d_6$ ).

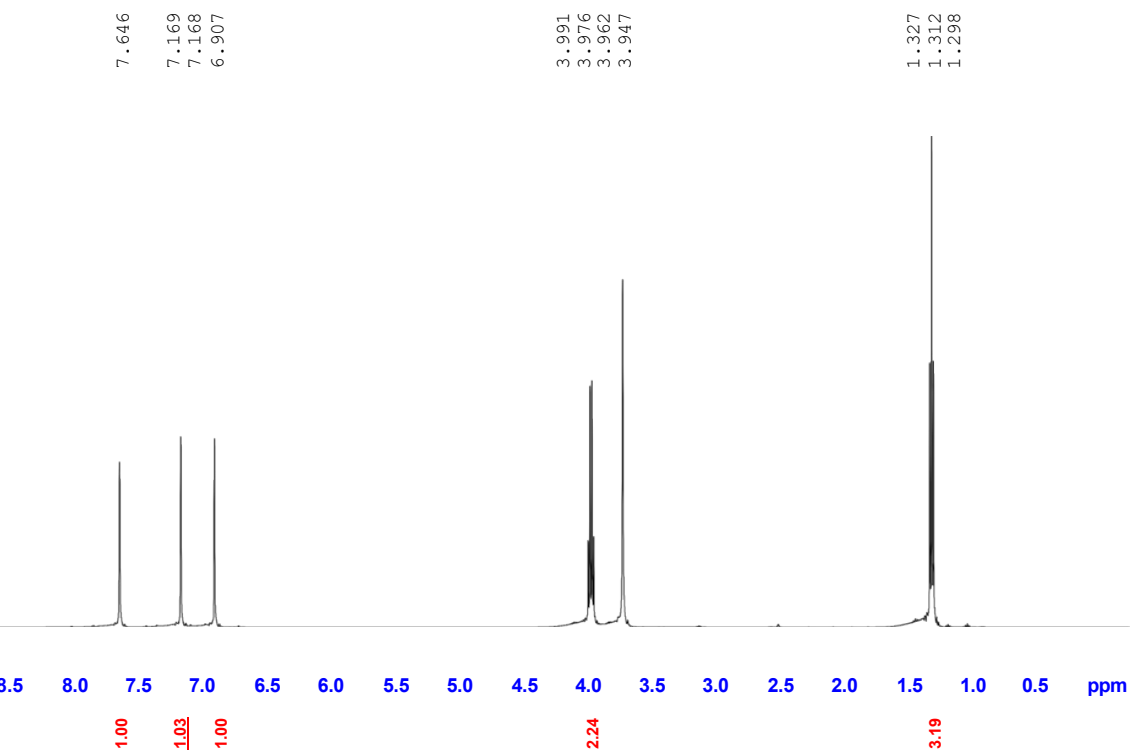

Figure S25.  $^{13}\text{C}$ -NMR spectrum of compound **1h** ( $\text{DMSO-}d_6$ ).

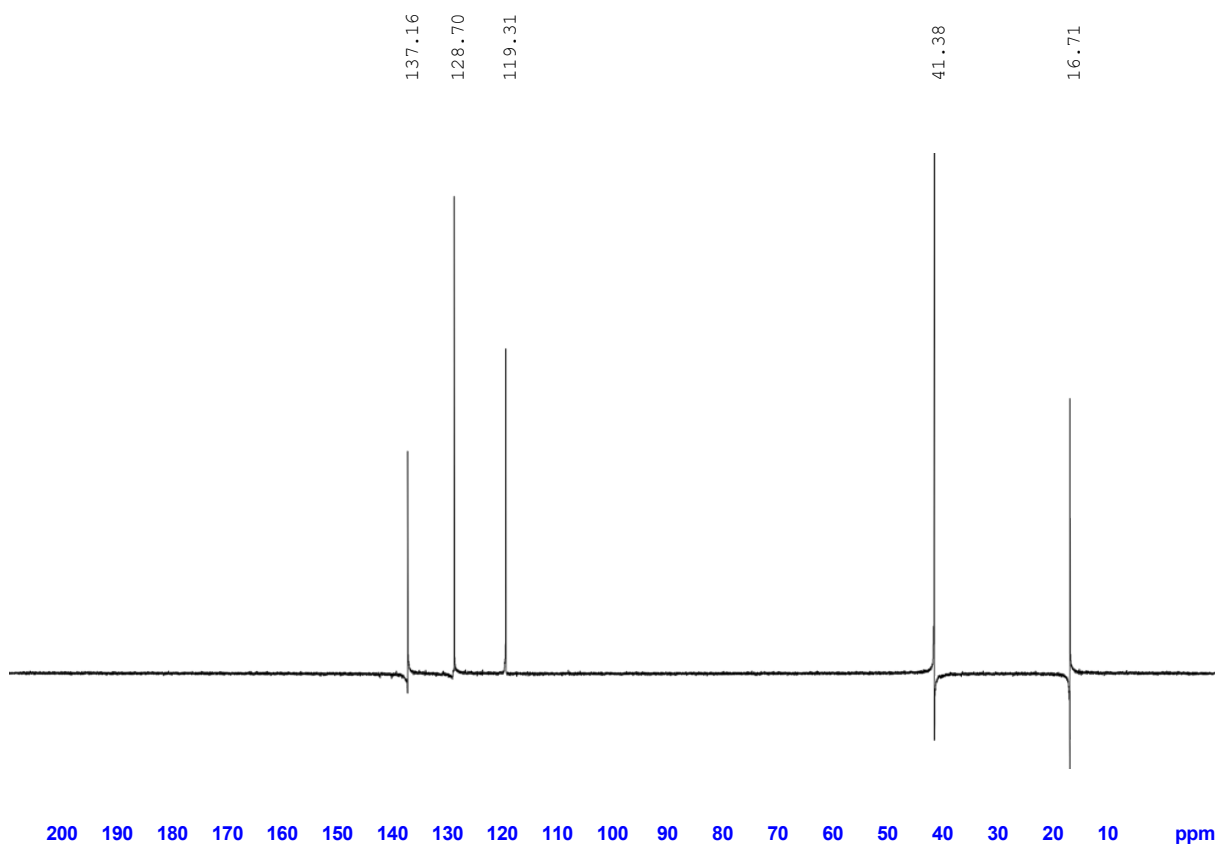

Figure S26.  $^1\text{H}$ -NMR spectrum of compound **1i** ( $\text{DMSO-}d_6$ ).

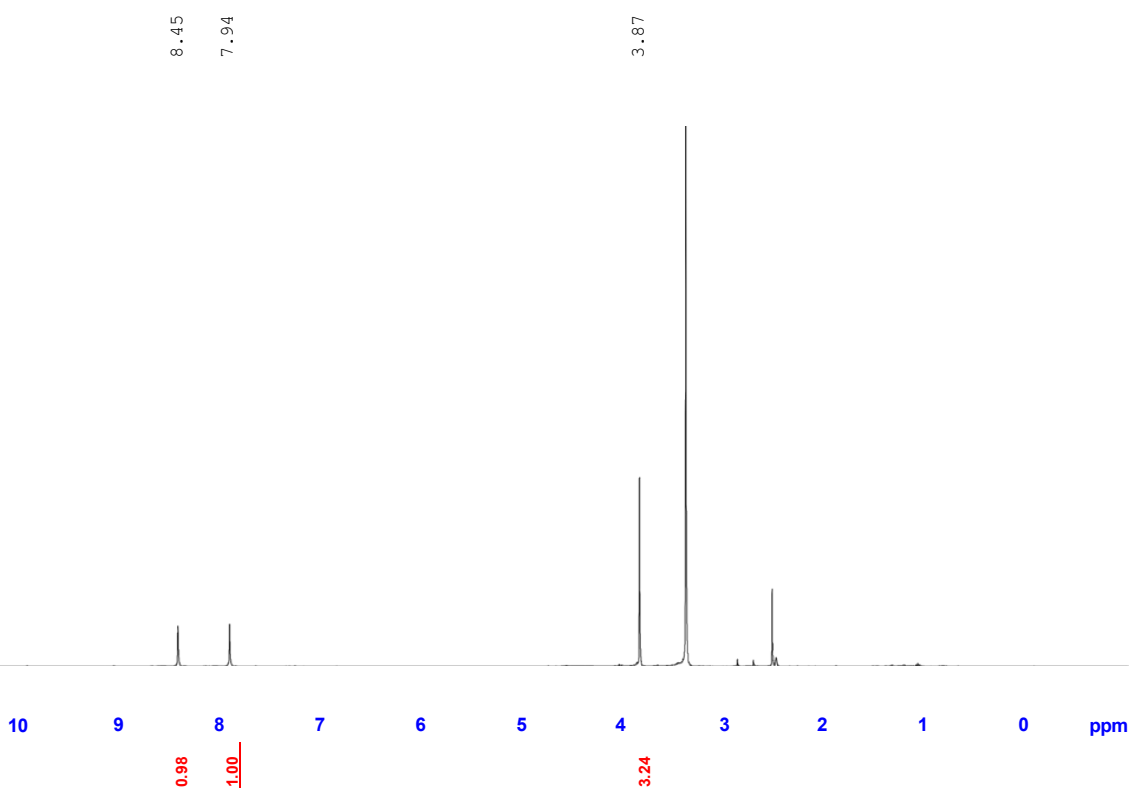

Figure S27.  $^{13}\text{C}$ -NMR spectrum of compound **1i** ( $\text{DMSO-}d_6$ ).

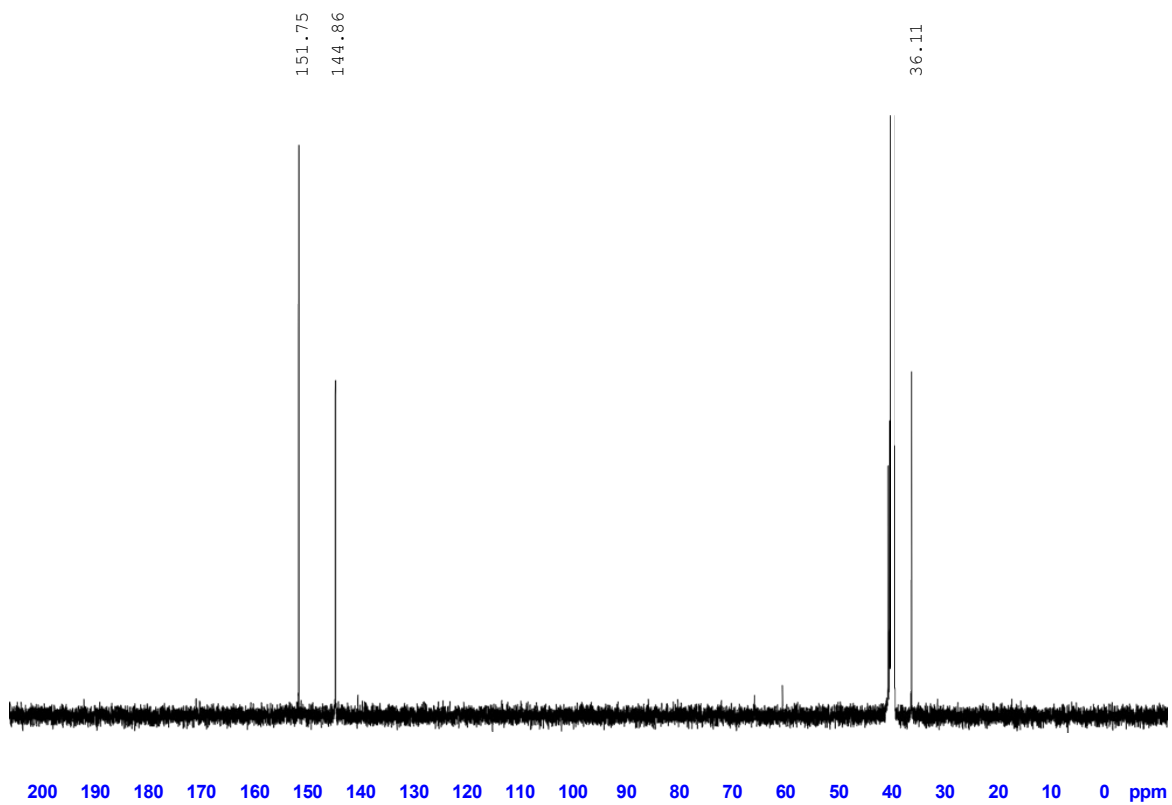

Figure S28.  $^1\text{H}$ -NMR spectrum of compound **1j** ( $\text{DMSO-}d_6$ ).

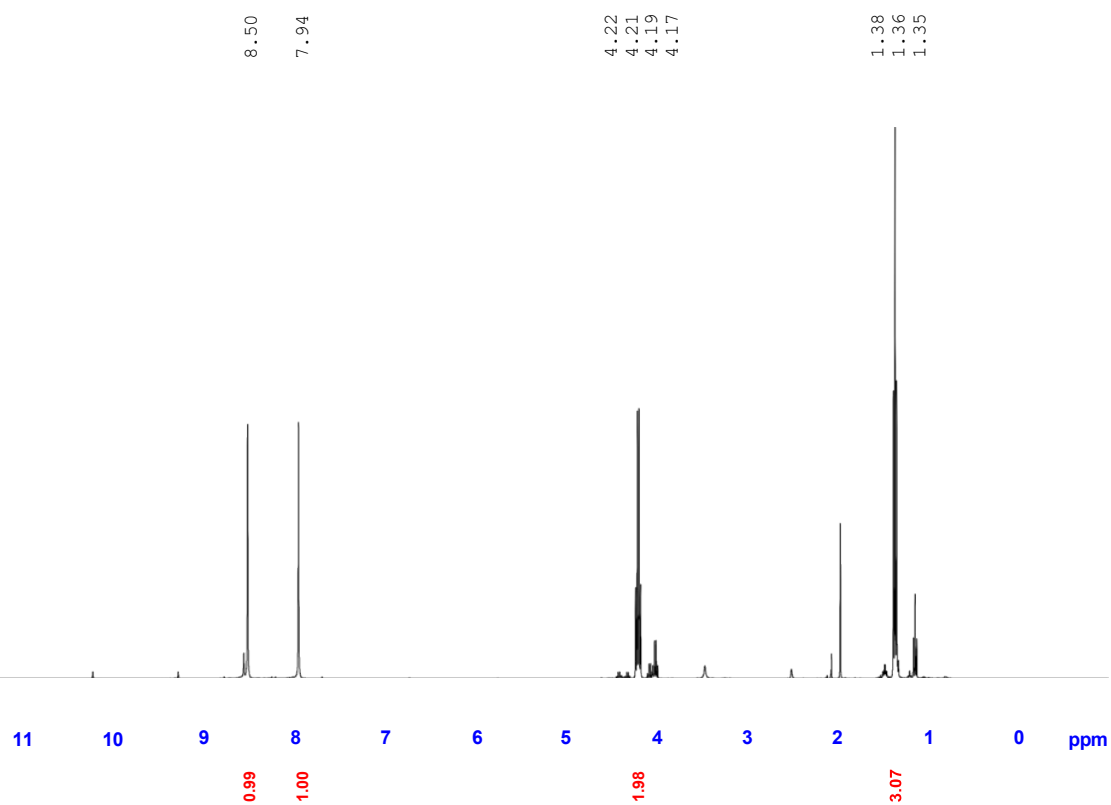

Figure S29.  $^{13}\text{C}$ -NMR spectrum of compound **1j** ( $\text{DMSO-}d_6$ ).

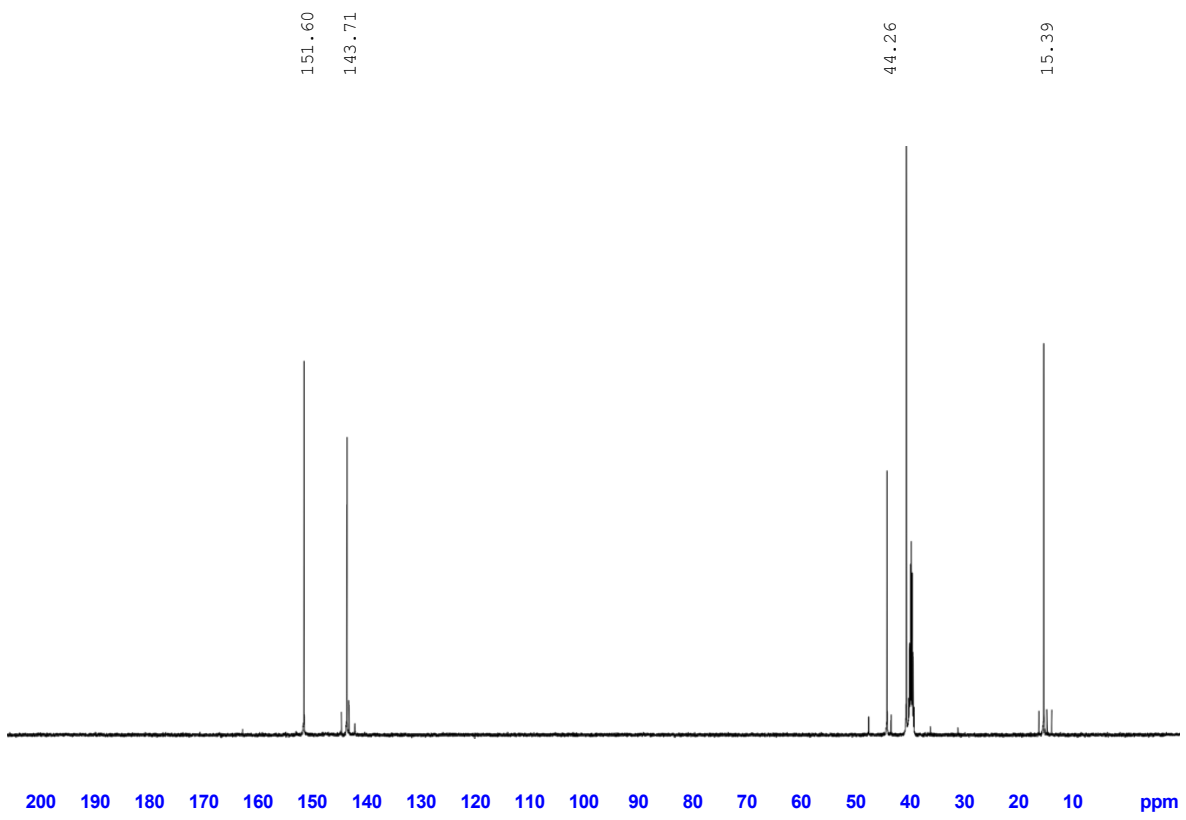



Figure S30.  $^1\text{H}$ -NMR spectrum of compound **1k** ( $\text{DMSO-}d_6$ ).

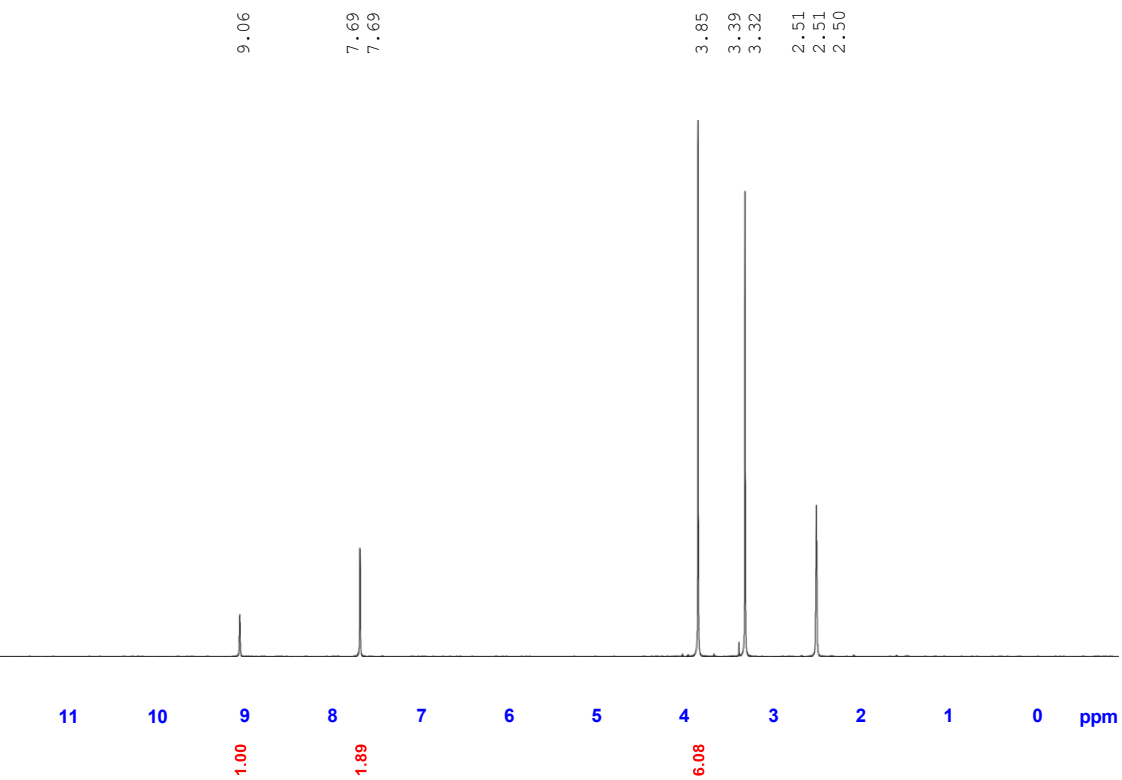

Figure S31.  $^{13}\text{C}$ -NMR spectrum of compound **1k** ( $\text{DMSO-}d_6$ ).

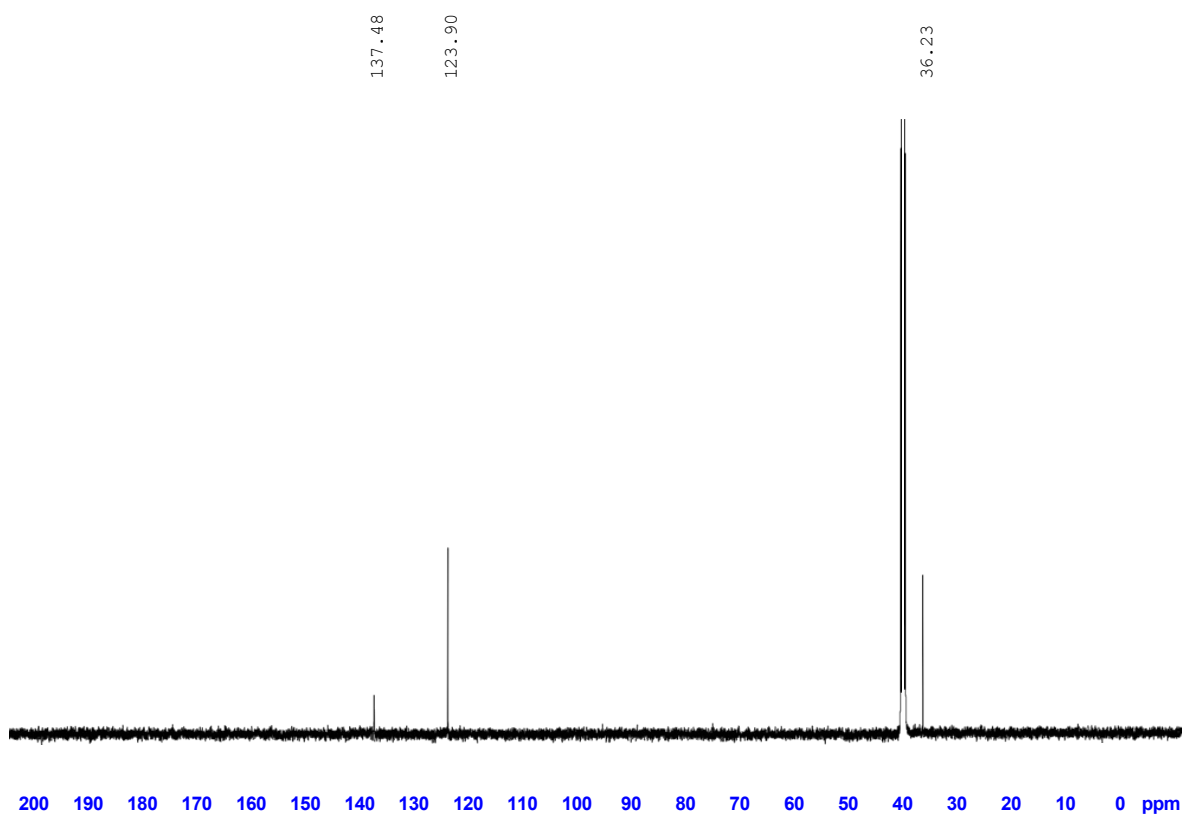

Figure S32. <sup>1</sup>H-NMR spectrum of compound **11** (DMSO-*d*<sub>6</sub>).

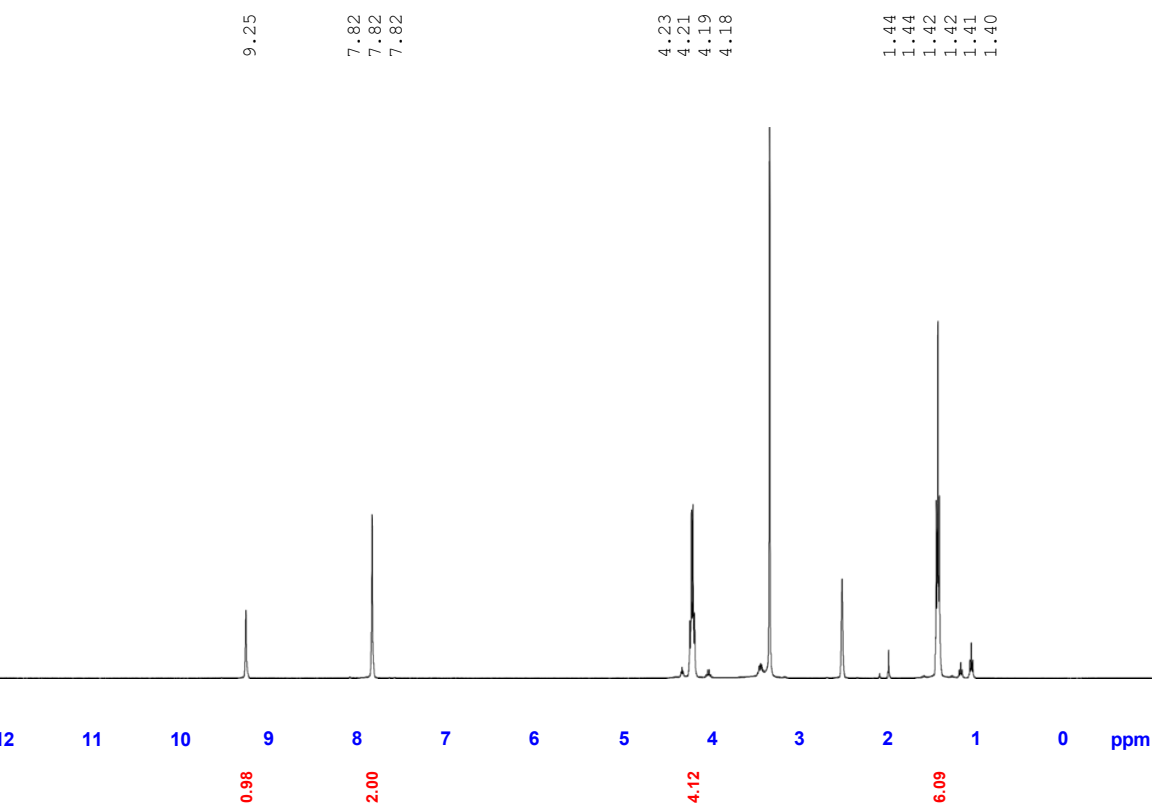

Figure S33. <sup>13</sup>C-NMR spectrum of compound **11** (DMSO-*d*<sub>6</sub>).

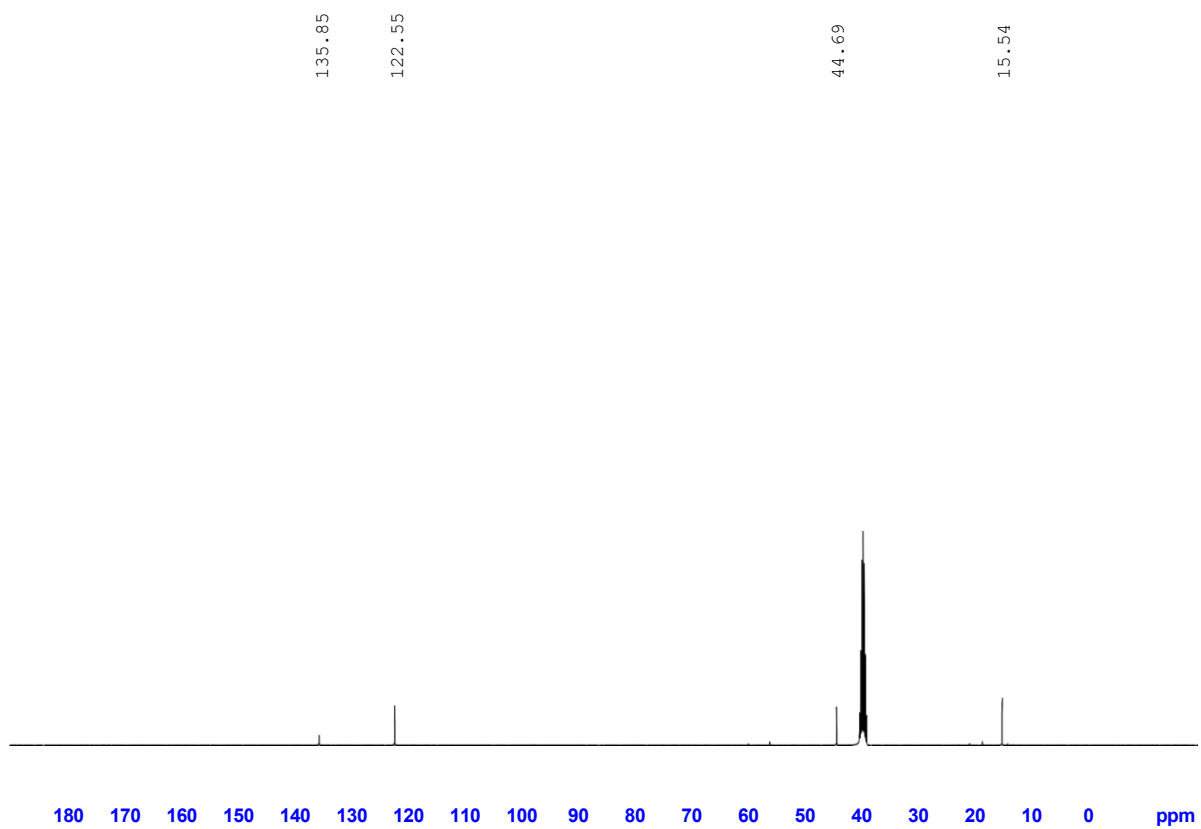

Figure S34.  $^1\text{H}$ -NMR spectrum of compound **1m** ( $\text{DMSO-}d_6$ ).

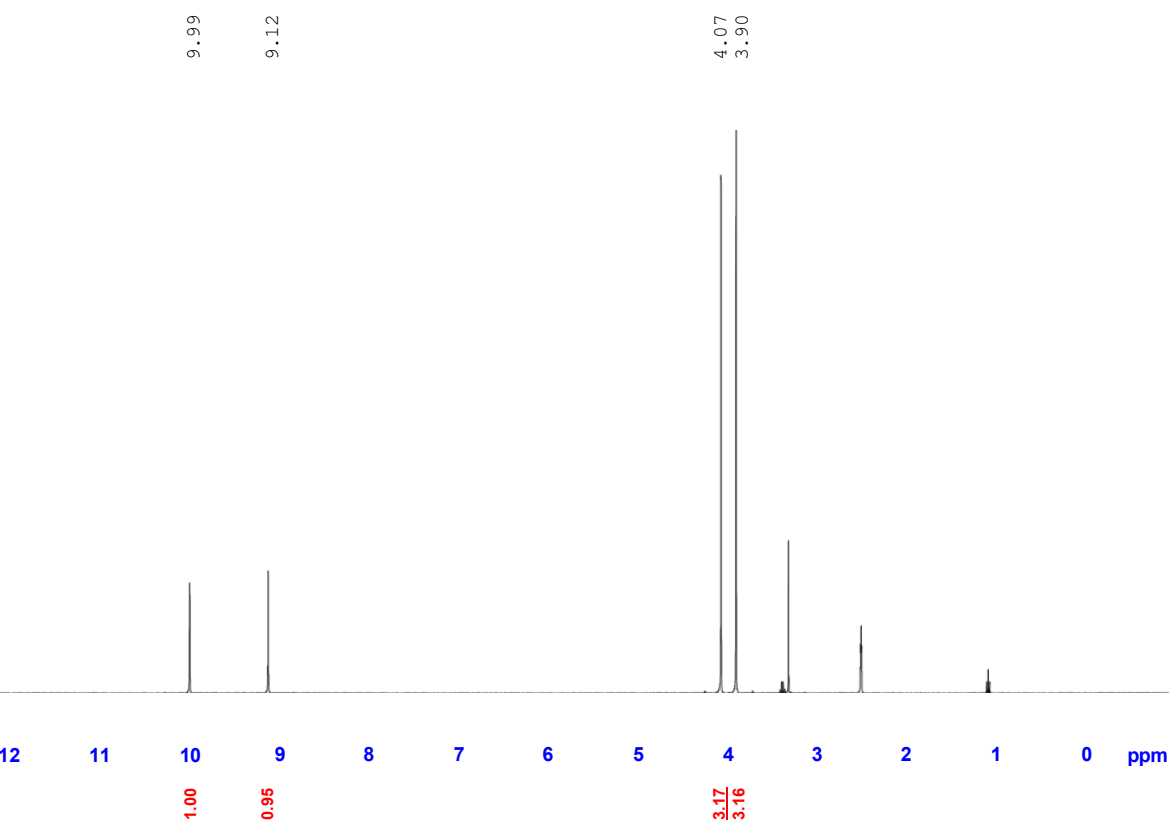

Figure S35. <sup>13</sup>C-NMR spectrum of compound **1m** (DMSO-*d*<sub>6</sub>).

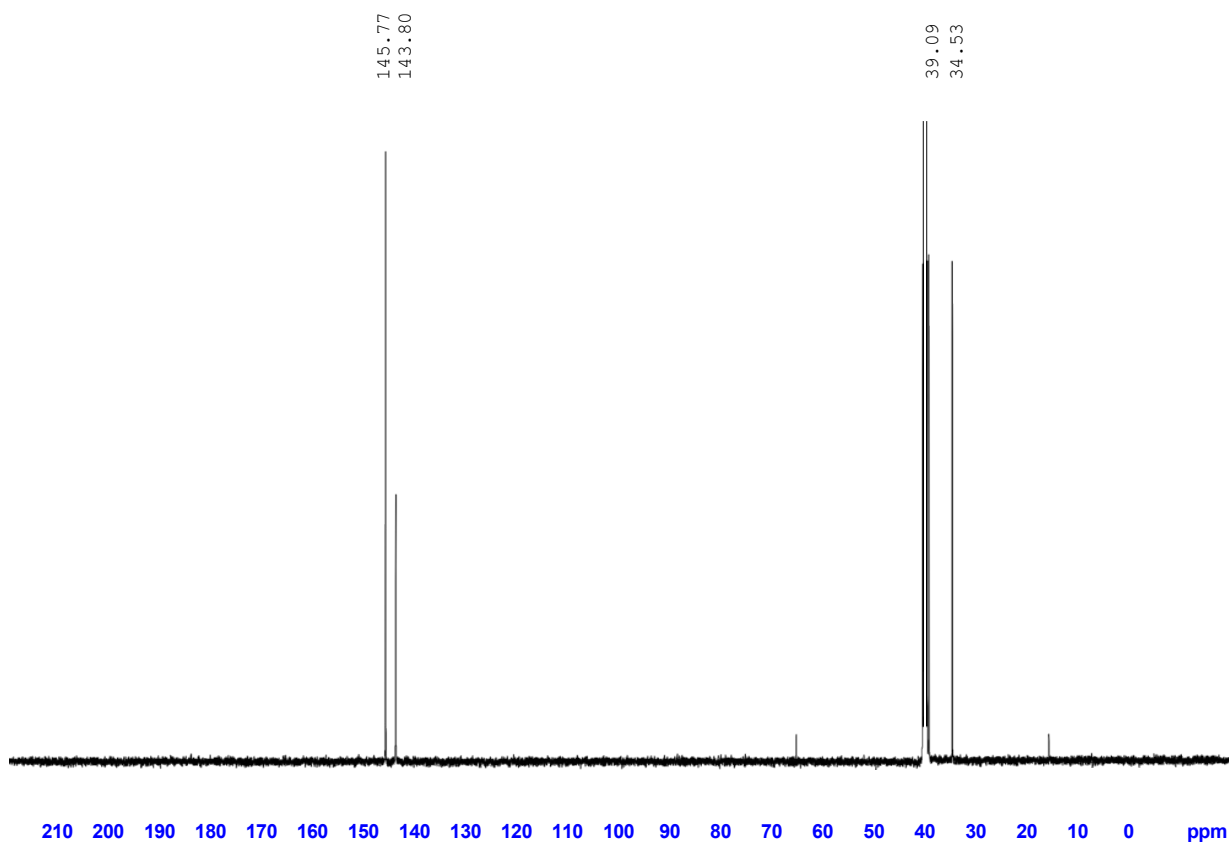

Figure S36.  $^1\text{H}$ -NMR spectrum of compound **1n** ( $\text{DMSO-}d_6$ ).

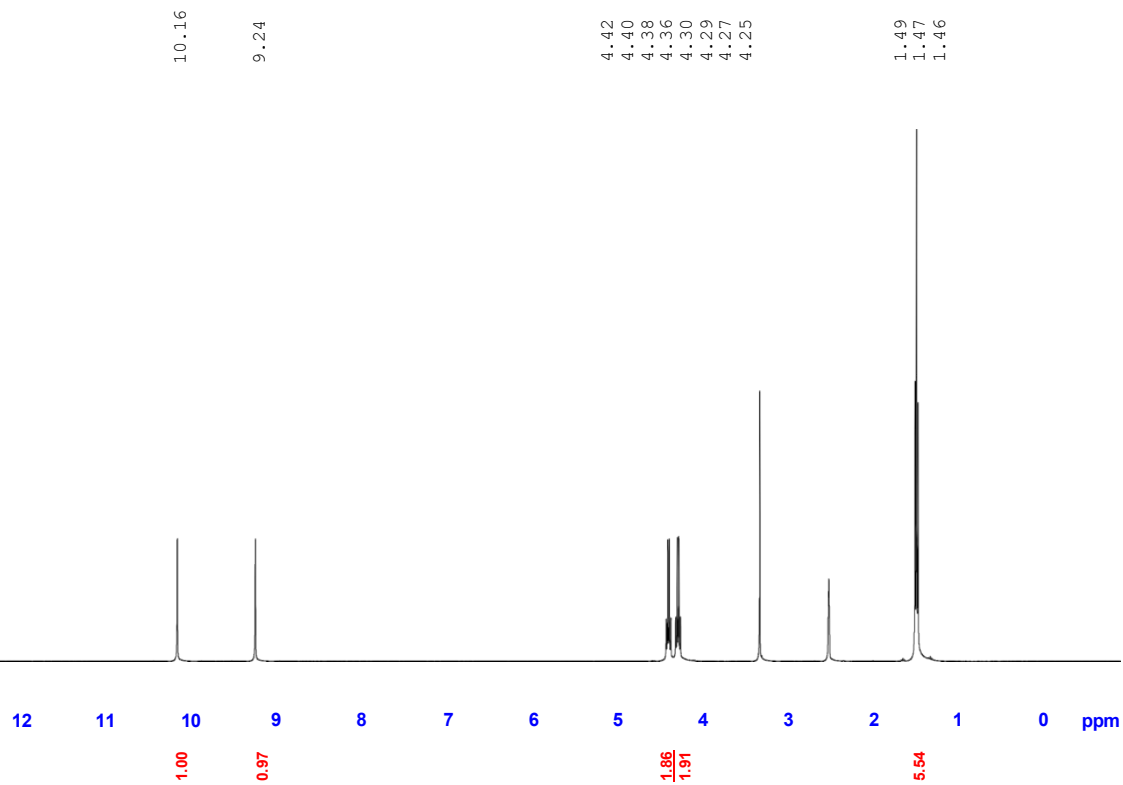

Figure S37.  $^{13}\text{C}$ -NMR spectrum of compound **1n** ( $\text{DMSO-}d_6$ ).

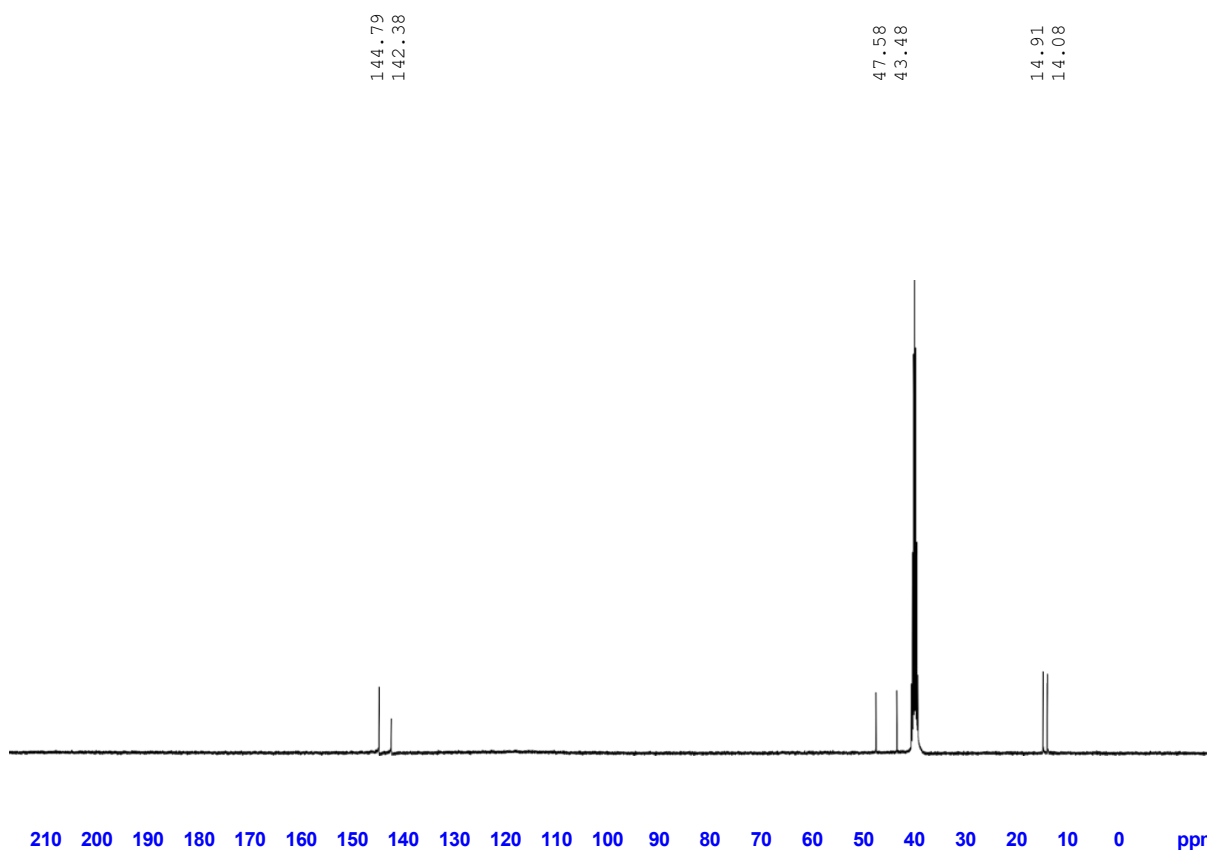

Figure S38.  $^1\text{H}$ -NMR spectrum of compound **3a** ( $\text{DMSO-}d_6$ ).



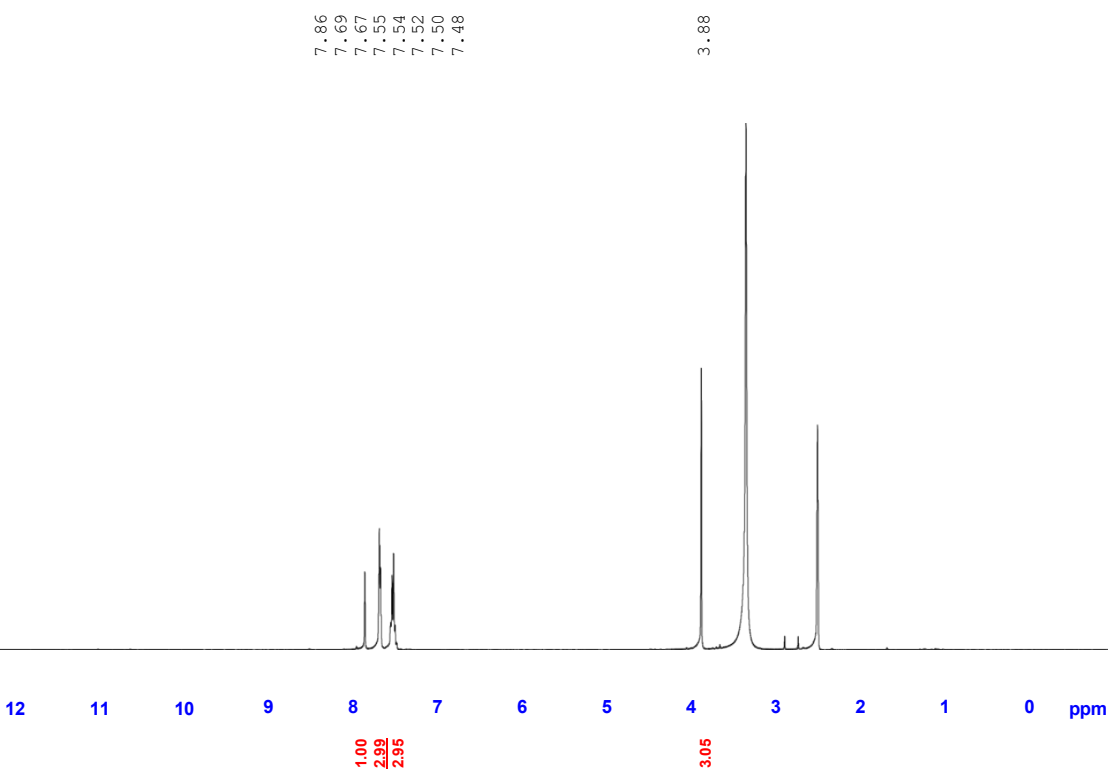

Figure S39.  $^{13}\text{C}$ -NMR spectrum of compound **3a** ( $\text{DMSO-}d_6$ ).

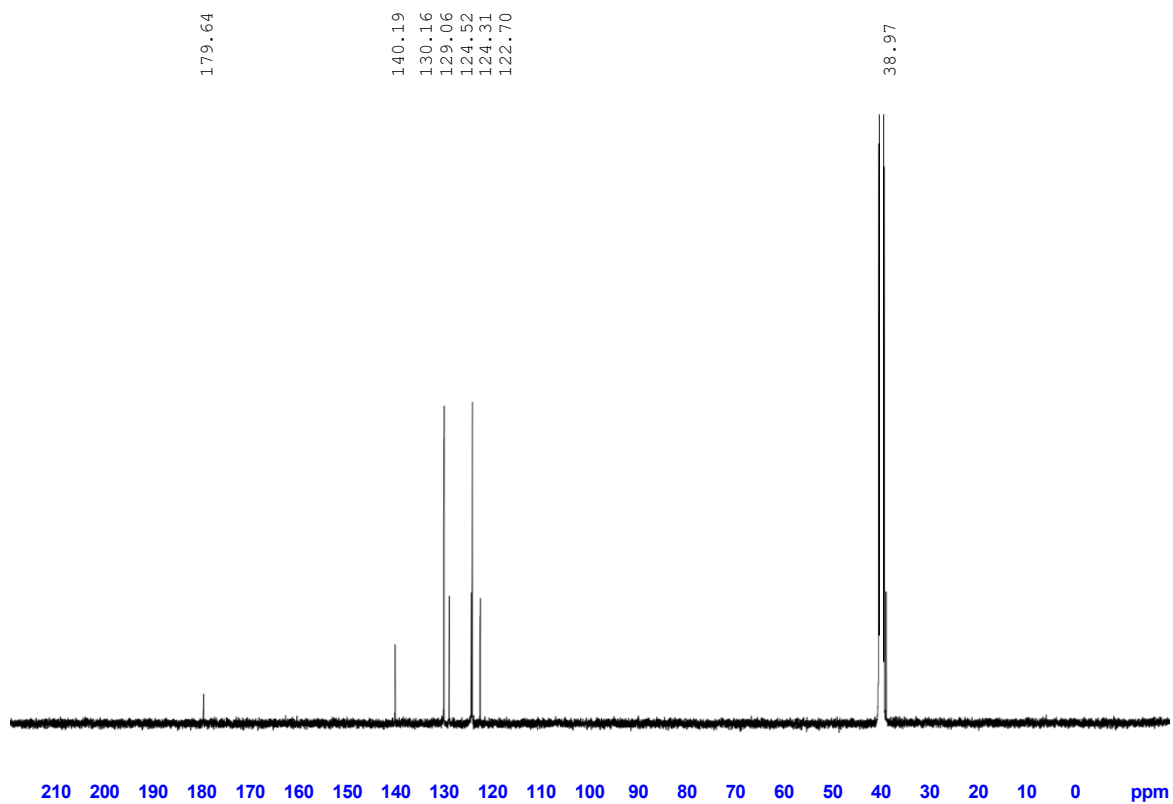

Figure S40.  $^1\text{H-NMR}$  spectrum of compound **3b** ( $\text{DMSO-}d_6$ ).

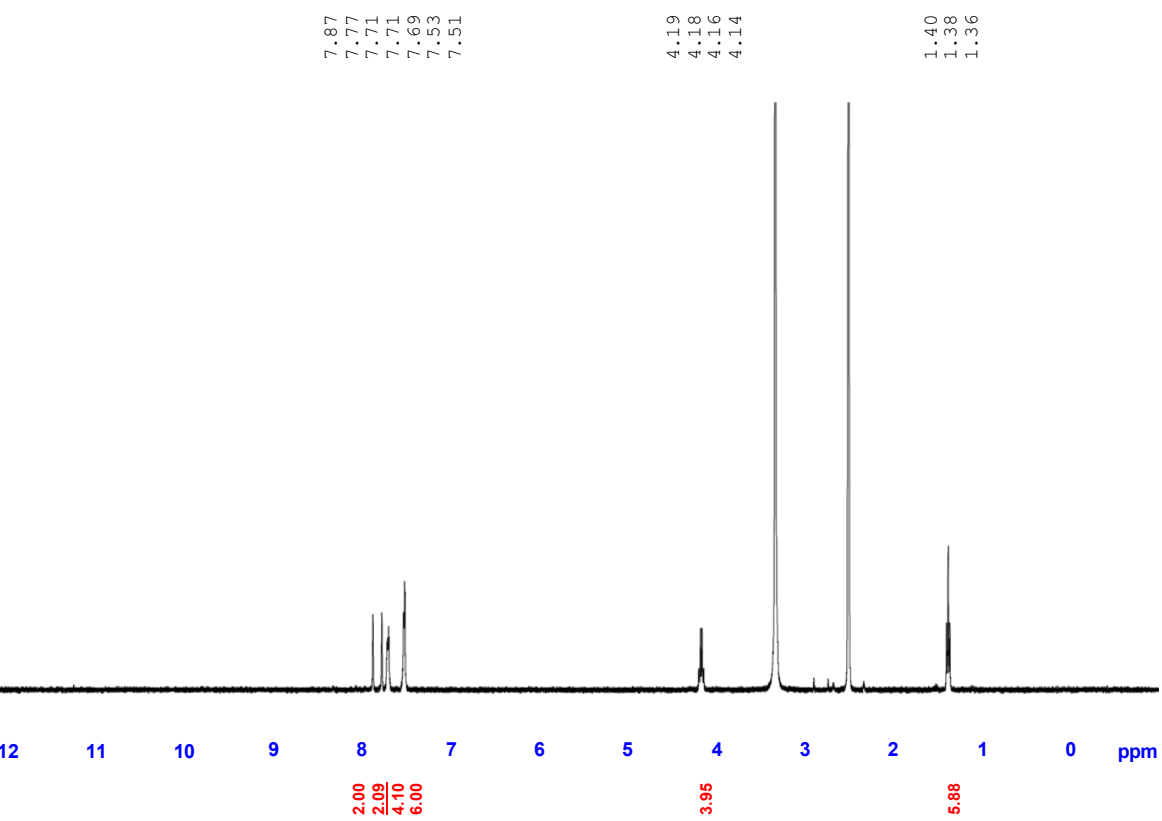

Figure S41.  $^{13}\text{C-NMR}$  spectrum of compound **3b** ( $\text{DMSO-}d_6$ ).

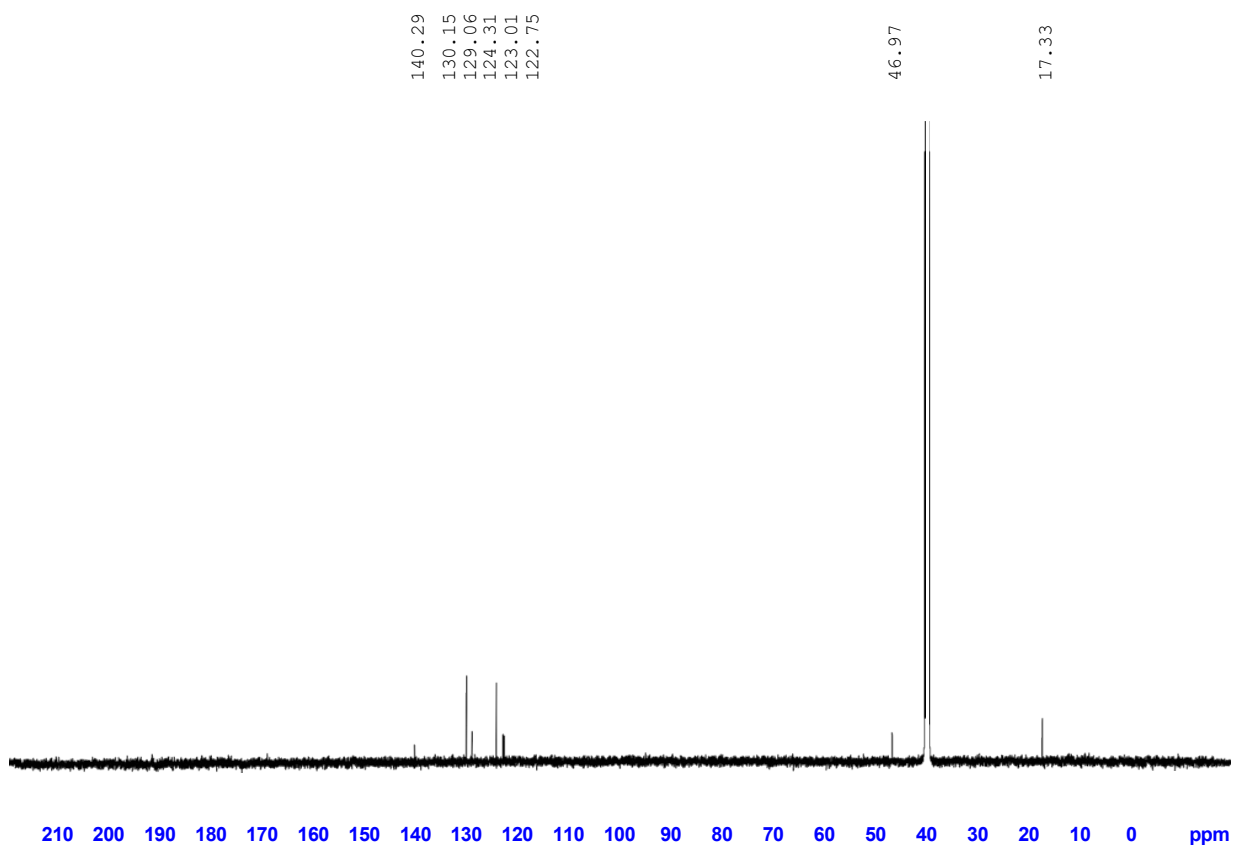

Figure S42.  $^1\text{H}$ -NMR spectrum of compound **3c** ( $\text{DMSO-}d_6$ ).

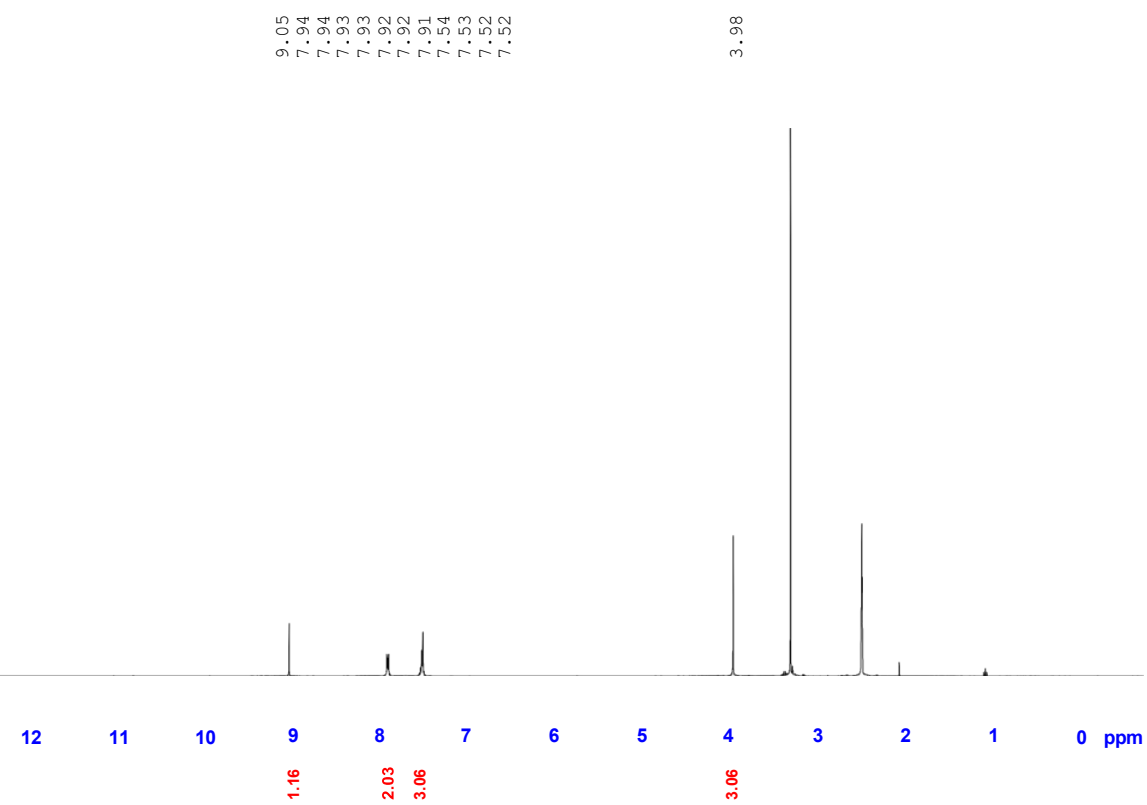

Figure S43. <sup>13</sup>C-NMR spectrum of compound **3c** (DMSO-*d*<sub>6</sub>).

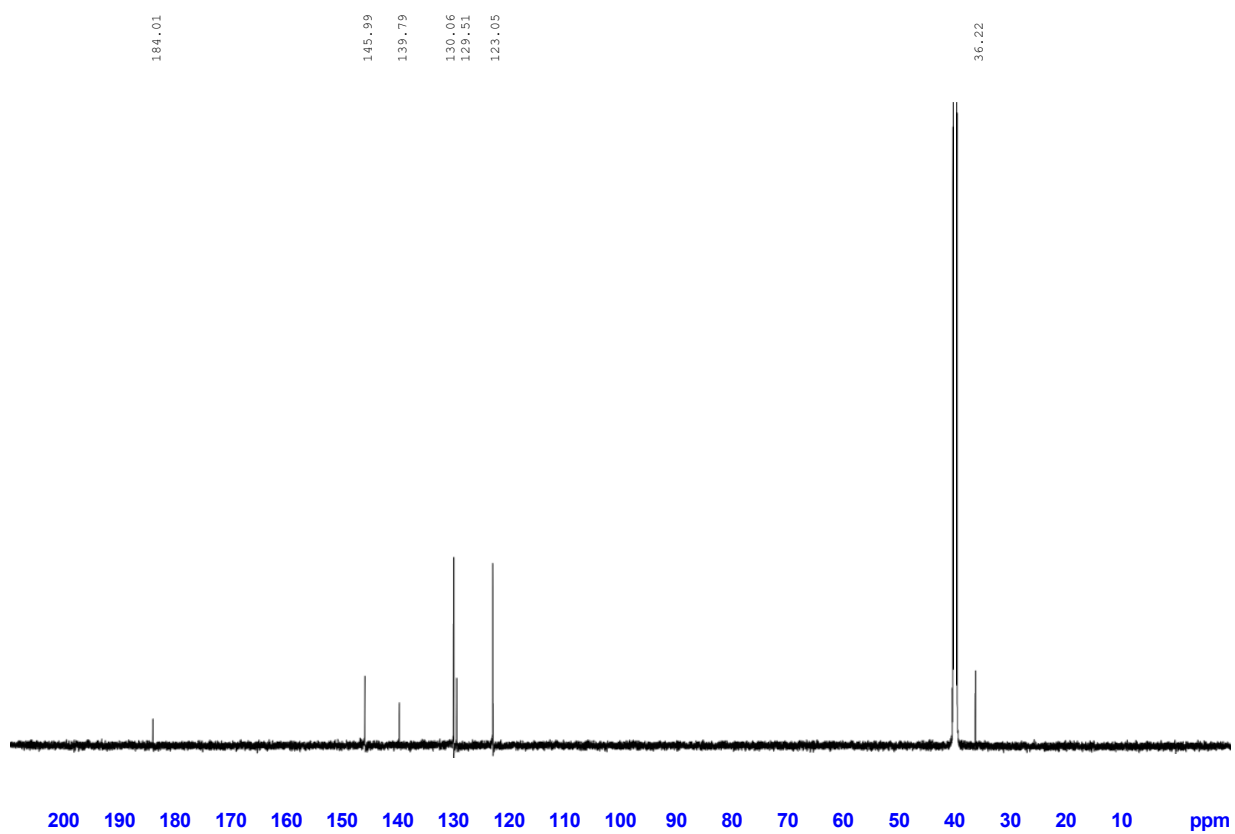

Figure S44.  $^{13}\text{C}$ -NMR spectrum of compound **3d** ( $\text{DMSO-}d_6$ ).

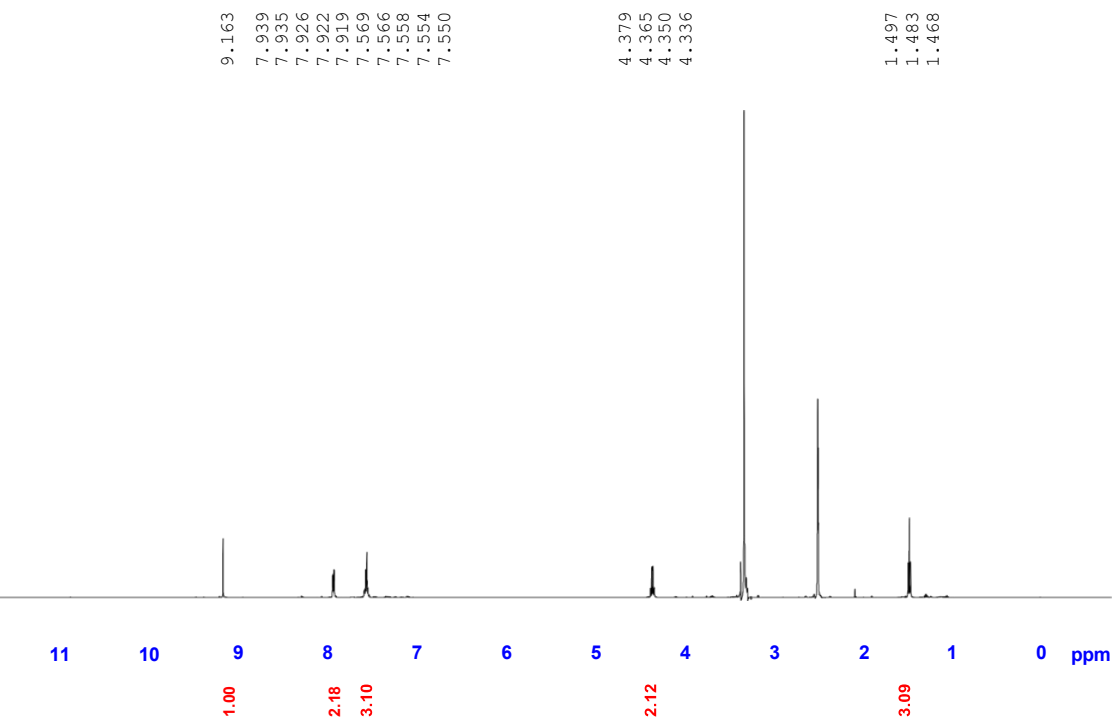

Figure S45. <sup>13</sup>C-NMR spectrum of compound **3d** (DMSO-*d*<sub>6</sub>).

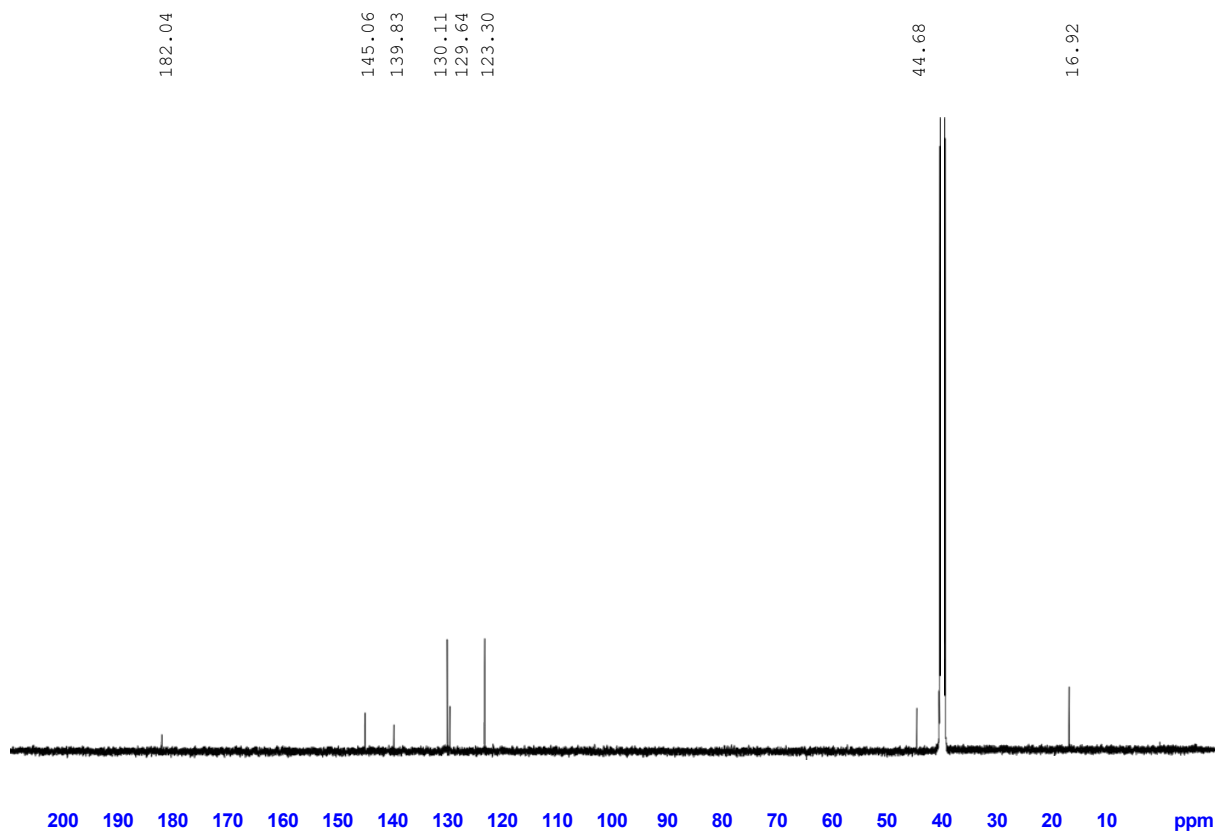

Figure S46. <sup>1</sup>H-NMR spectrum of compound **3e** (DMSO-*d*<sub>6</sub>).

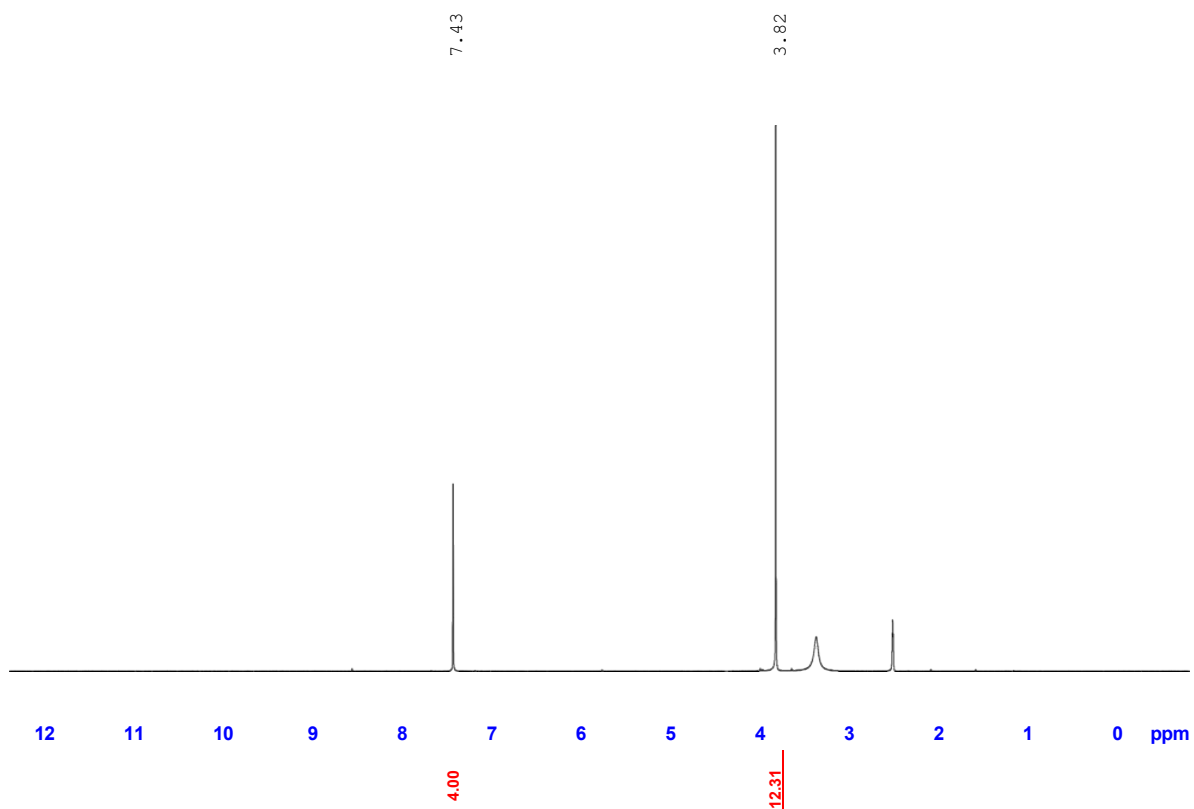

Figure S47. <sup>13</sup>C-NMR spectrum of compound **3e** (DMSO-*d*<sub>6</sub>).



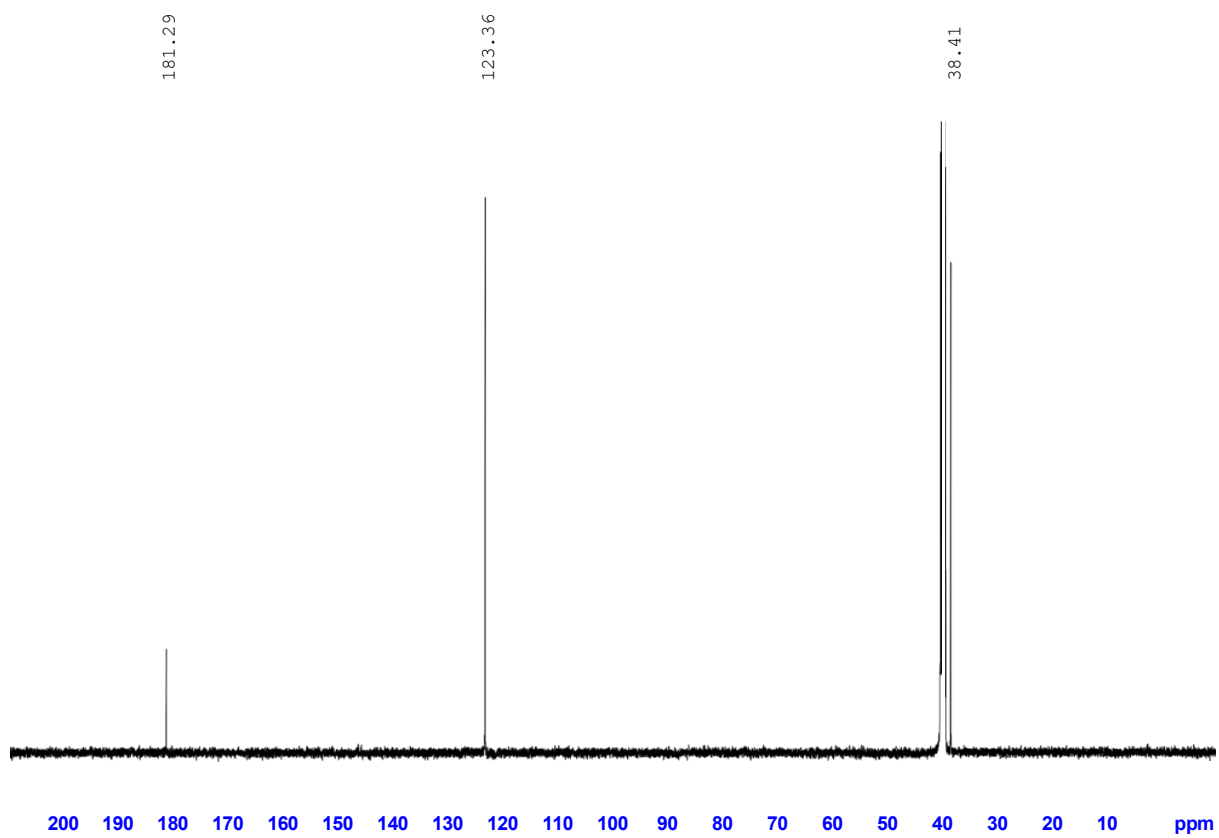

Figure S48.  $^1\text{H}$ -NMR spectrum of compound **3f** ( $\text{DMSO-}d_6$ ).

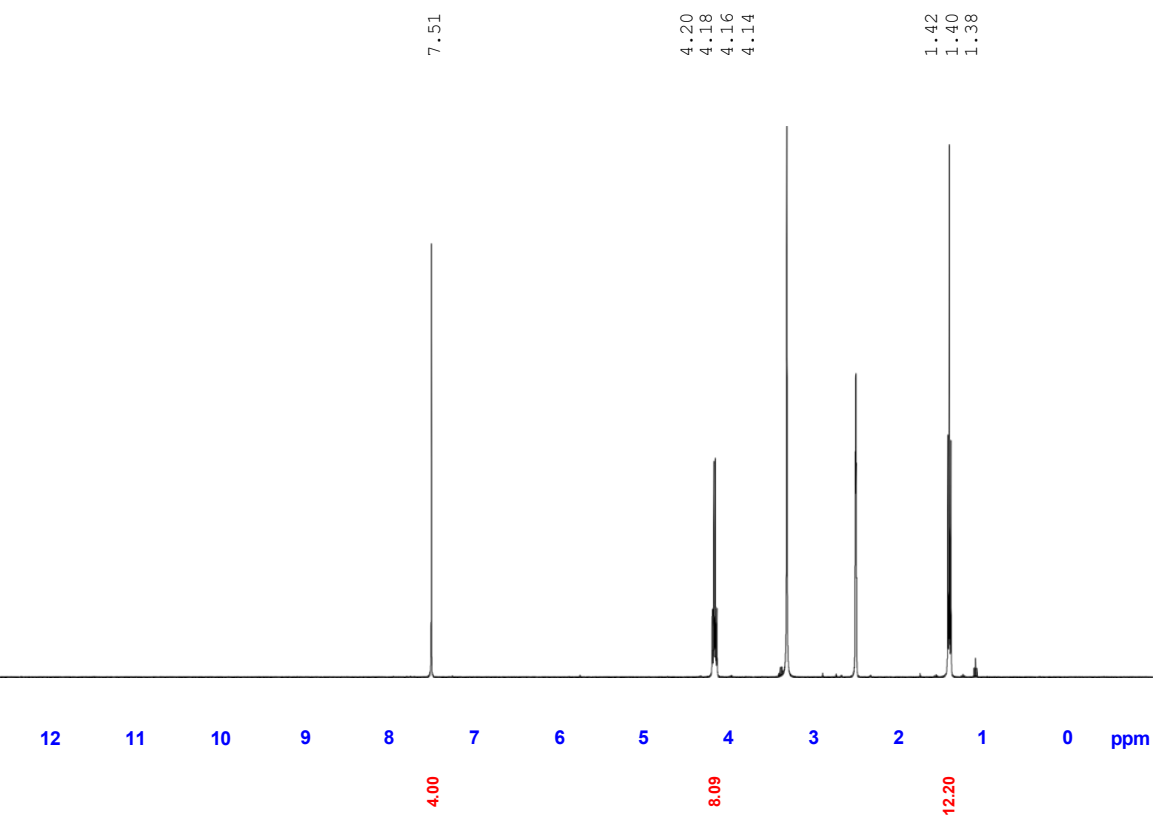

Figure S49.  $^{13}\text{C}$ -NMR spectrum of compound **3f** ( $\text{DMSO-}d_6$ ).

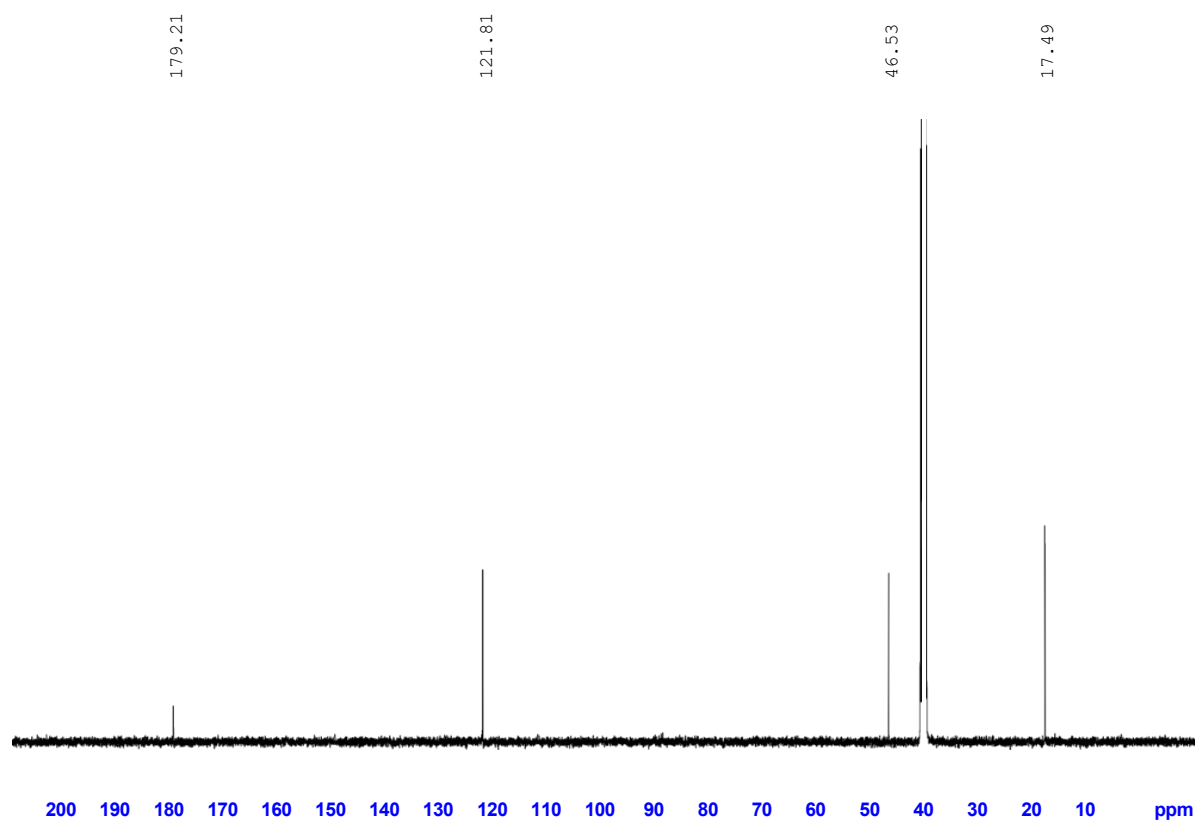

Figure S50.  $^1\text{H}$ -NMR spectrum of compound **3g** ( $\text{DMSO-}d_6$ ).

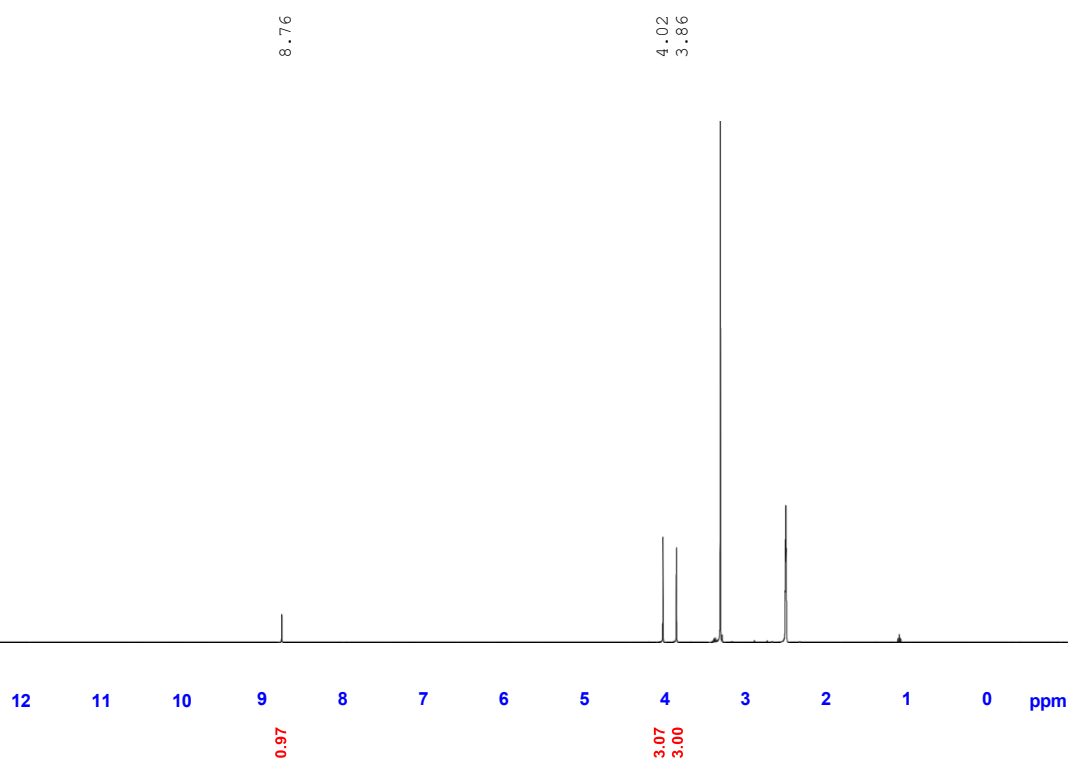

Figure S51.  $^{13}\text{C}$ -NMR spectrum of compound **3g** ( $\text{DMSO-}d_6$ ).

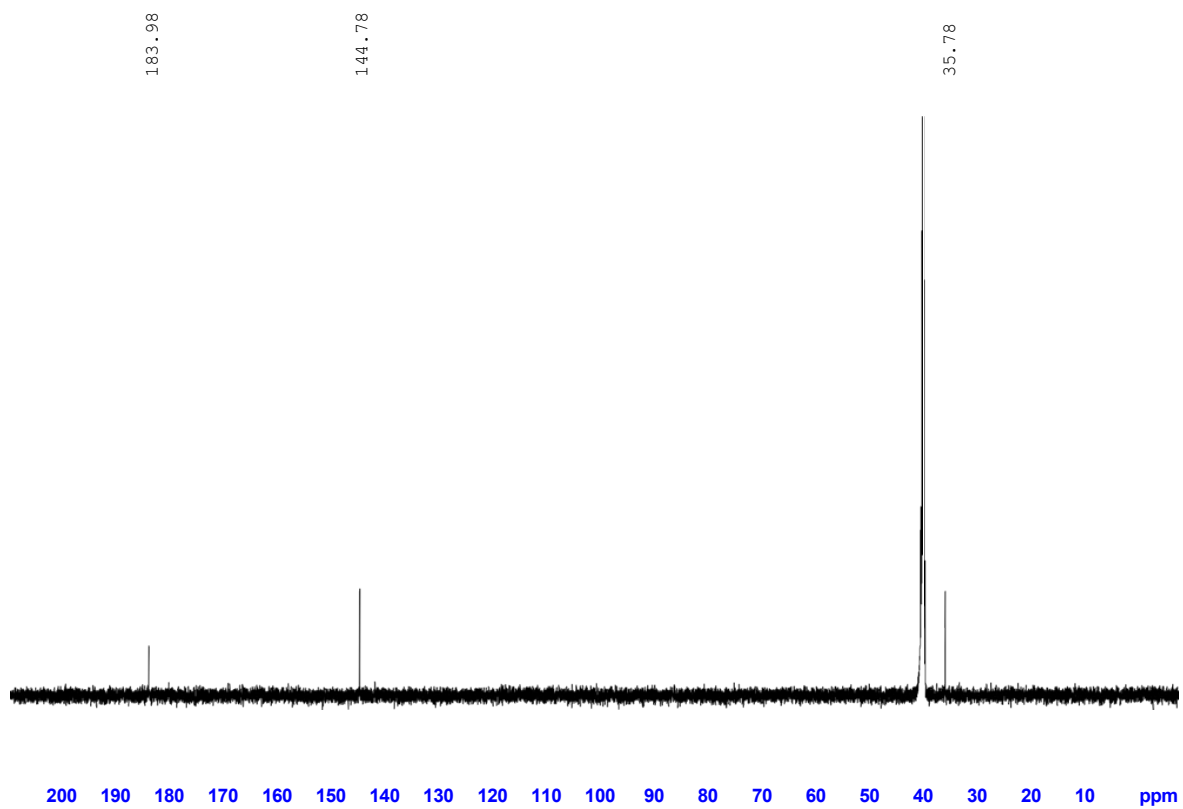

Figure S52. <sup>1</sup>H-NMR spectrum of compound **3h** (DMSO-*d*<sub>6</sub>).

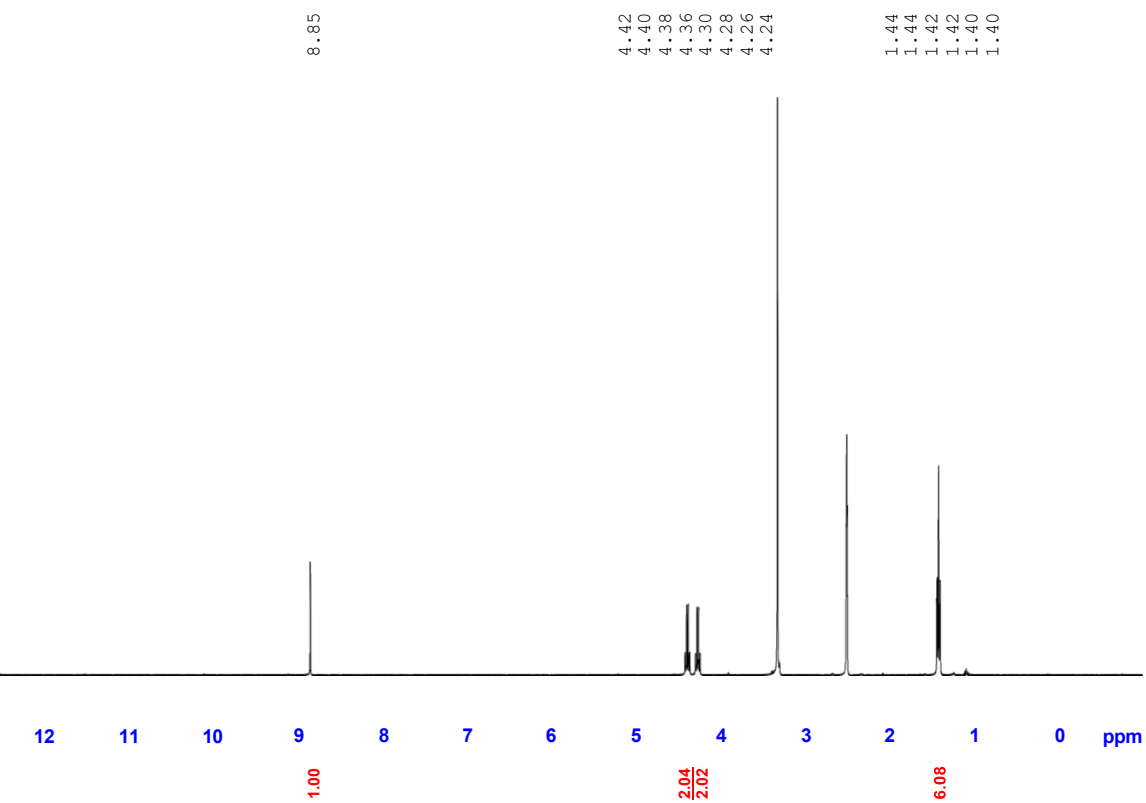

Figure S53.  $^{13}\text{C}$ -NMR spectrum of compound **3h** ( $\text{DMSO-}d_6$ ).

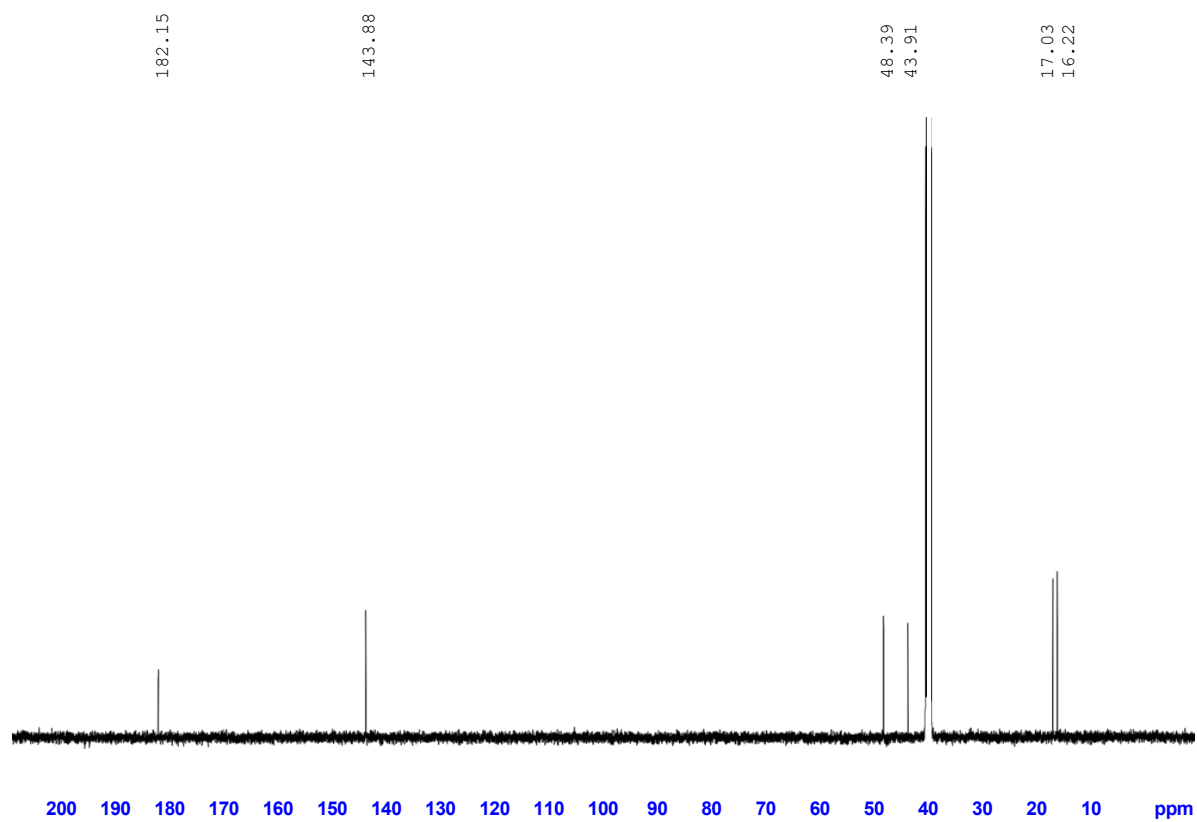

Figure S54.  $^1\text{H}$ -NMR spectrum of compound **4a** ( $\text{DMSO-}d_6$ ).

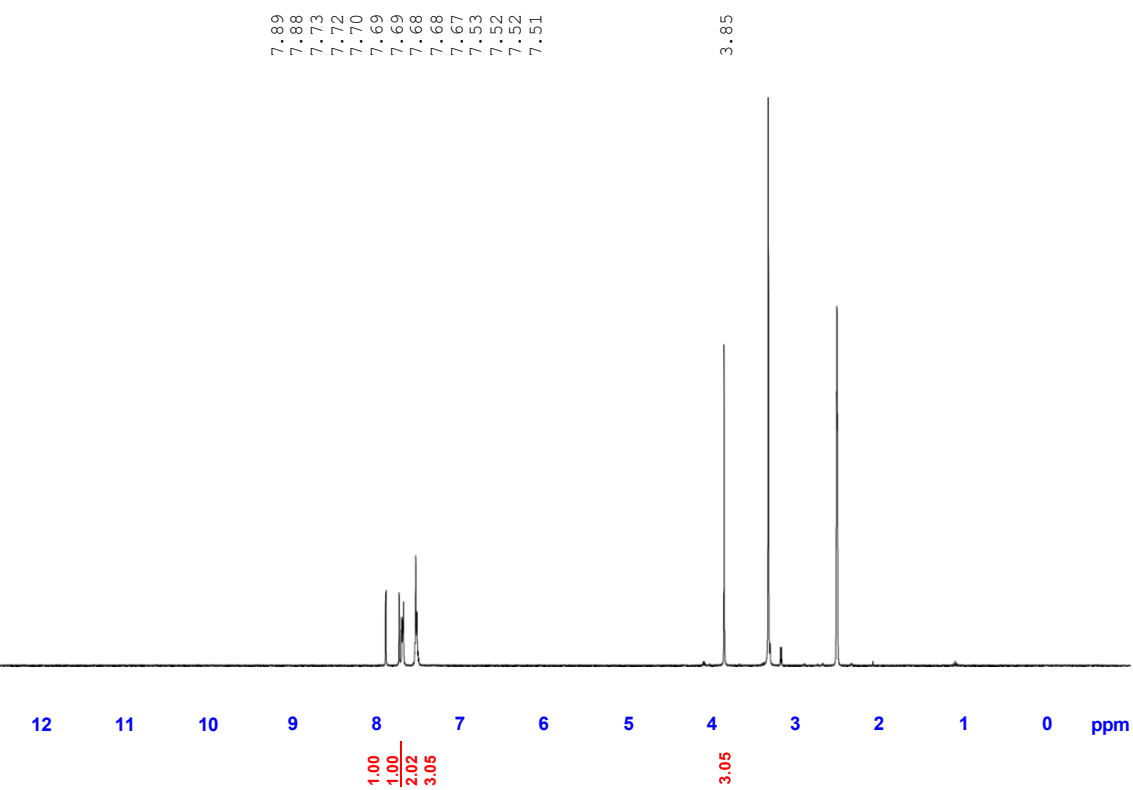

Figure S55. <sup>13</sup>C-NMR spectrum of compound **4a** (DMSO-*d*<sub>6</sub>).



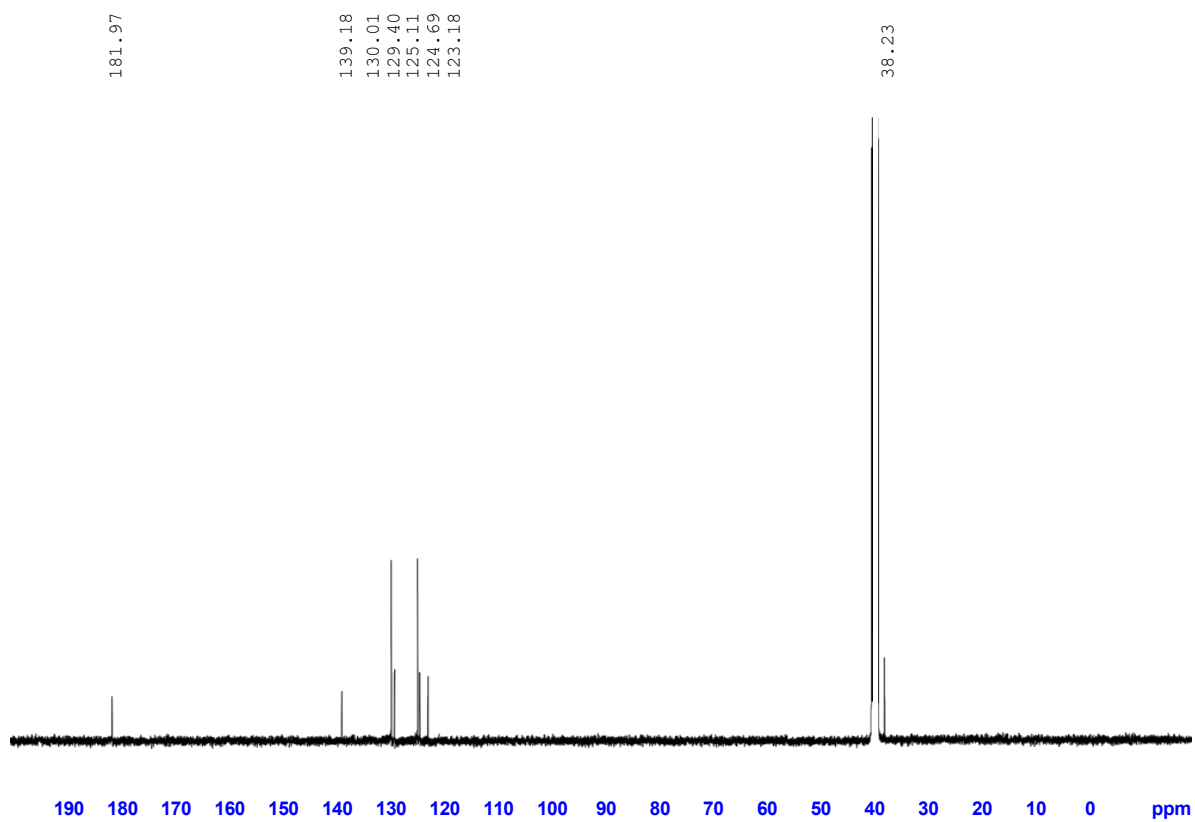

Figure S56.  $^1\text{H-NMR}$  spectrum of compound **4b** ( $\text{DMSO-}d_6$ ).

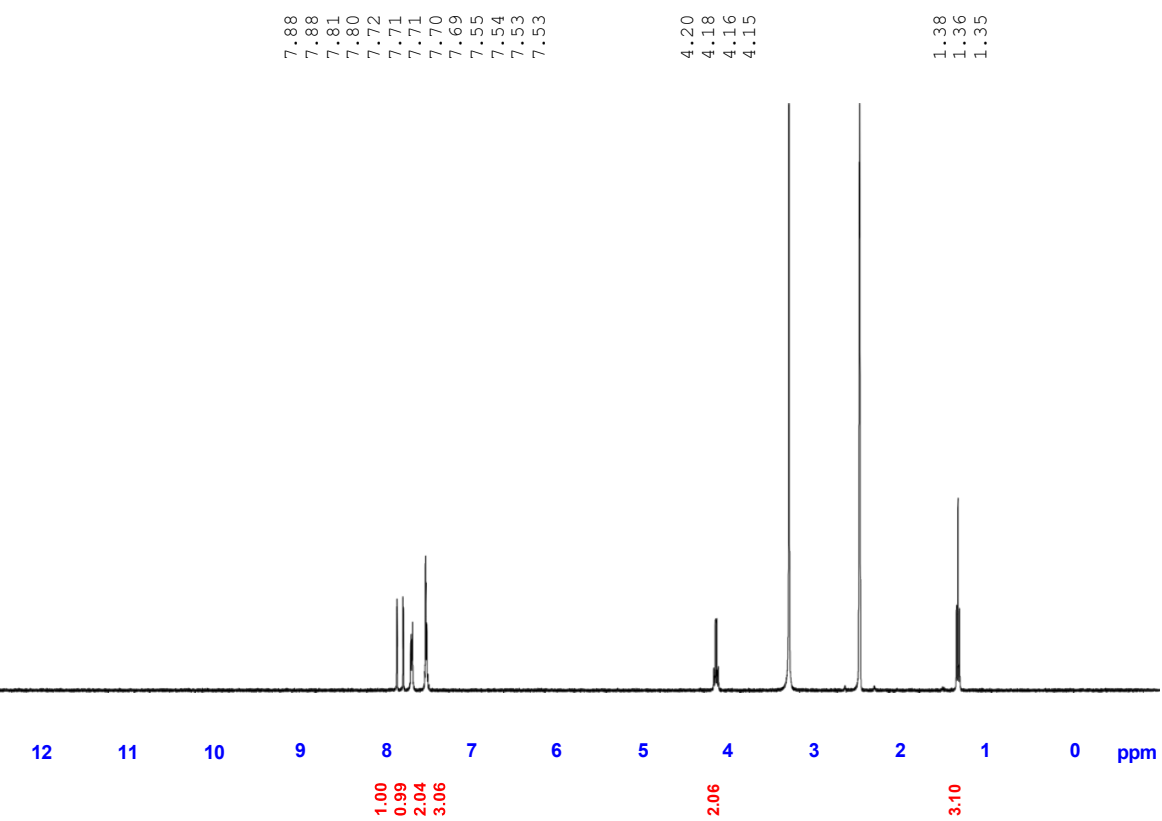

Figure S57. <sup>13</sup>C-NMR spectrum of compound **4b** (DMSO-*d*<sub>6</sub>).

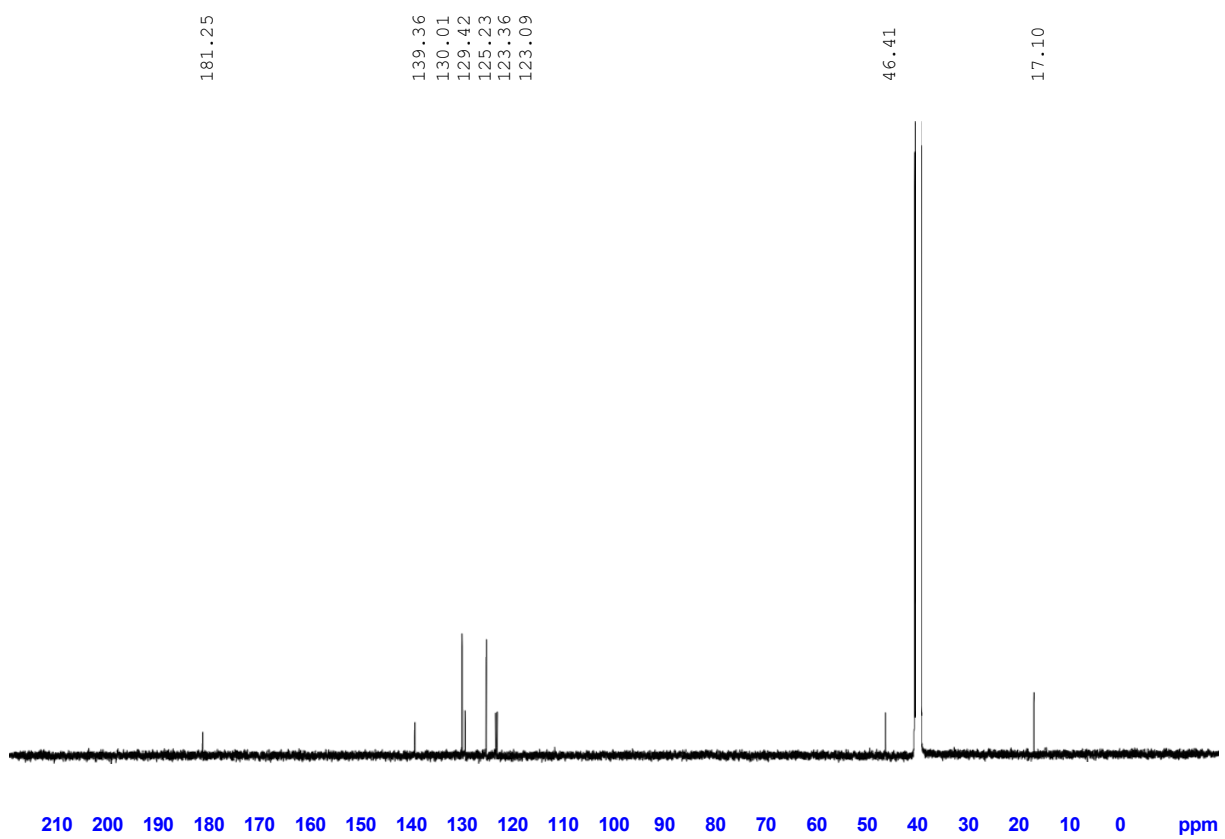

Figure S58.  $^1\text{H-NMR}$  spectrum of compound **4c** ( $\text{DMSO-}d_6$ ).

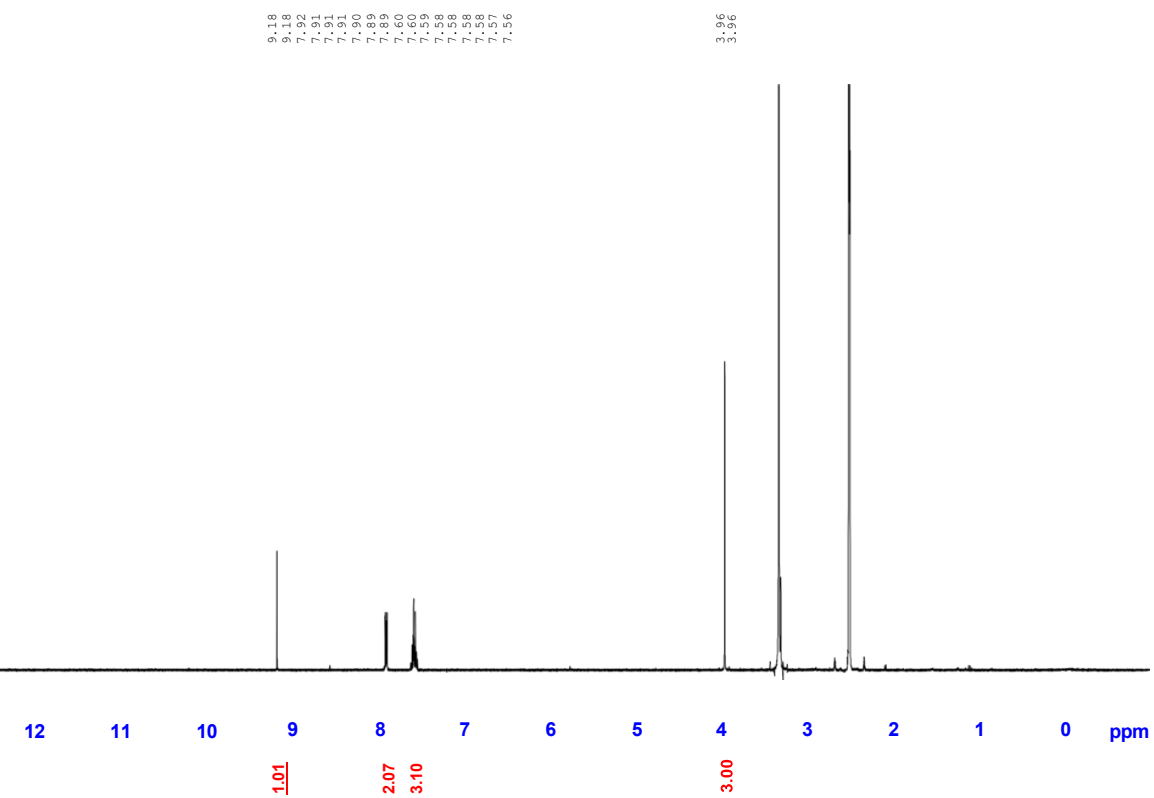

Figure S59.  $^{13}\text{C-NMR}$  spectrum of compound **4c** ( $\text{DMSO-}d_6$ ).

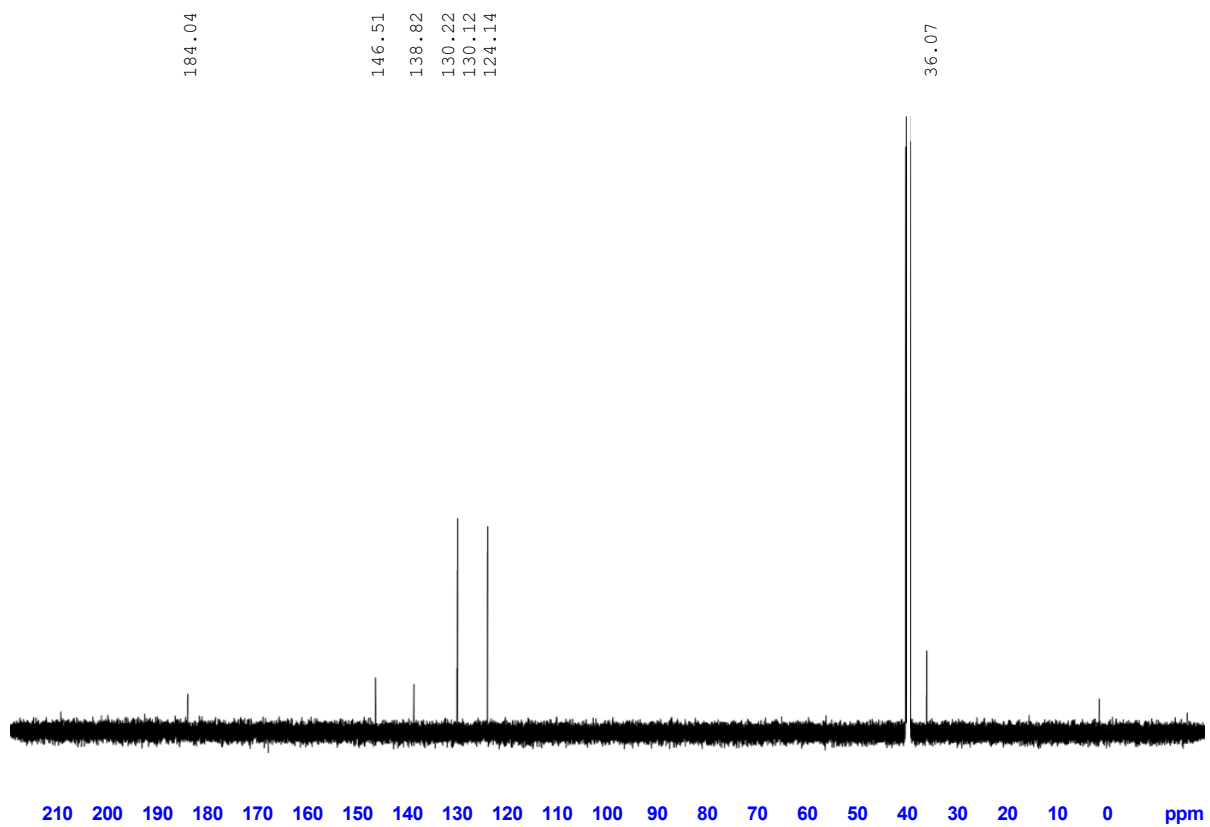

Figure S60.  $^{13}\text{C}$ -NMR spectrum of compound **4d** ( $\text{DMSO-}d_6$ ).

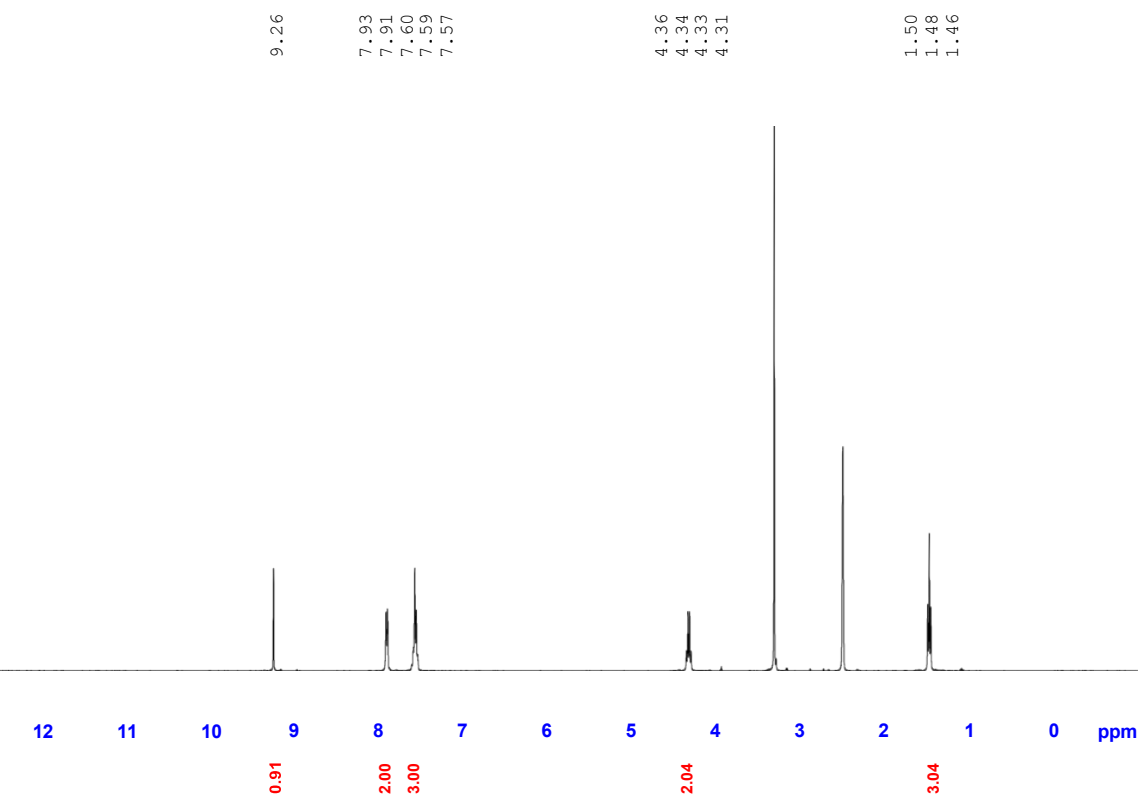

Figure S61. <sup>13</sup>C-NMR spectrum of compound **4d** (DMSO-*d*<sub>6</sub>).

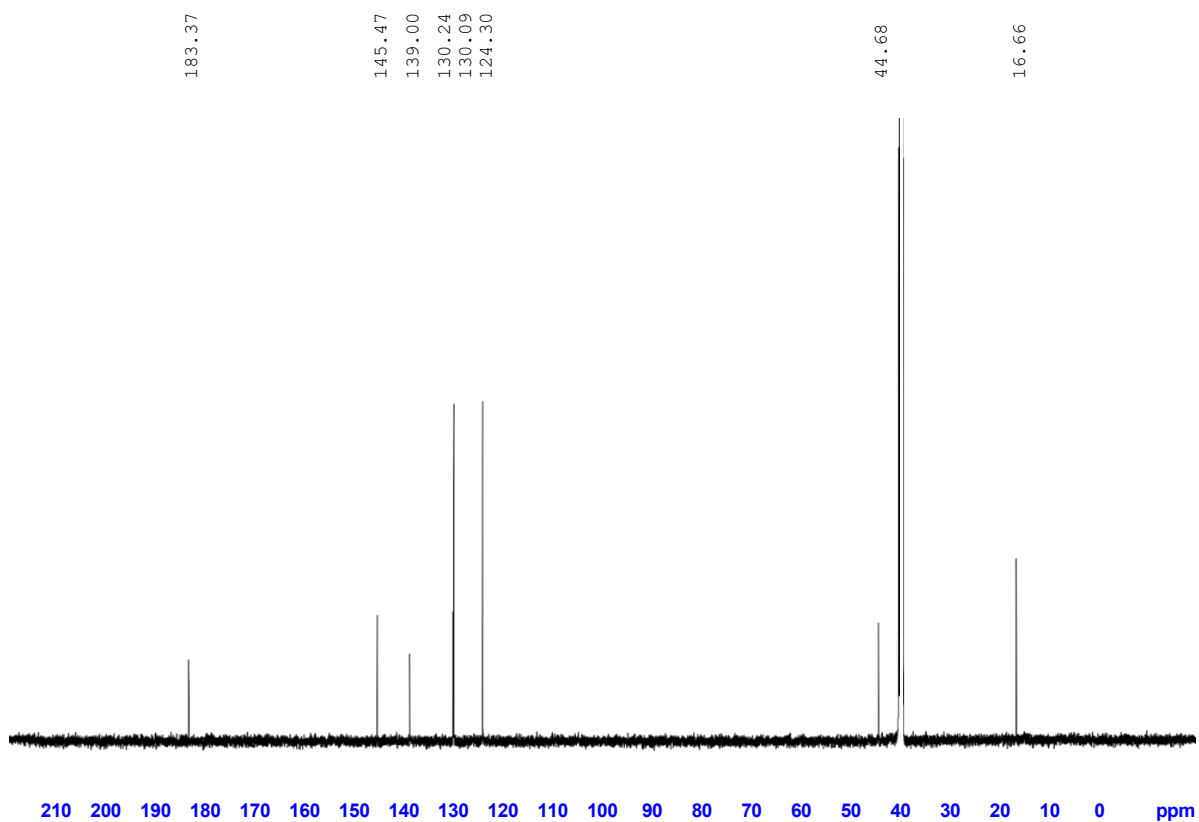

Figure S62. <sup>1</sup>H-NMR spectrum of compound **4e** (DMSO-*d*<sub>6</sub>).

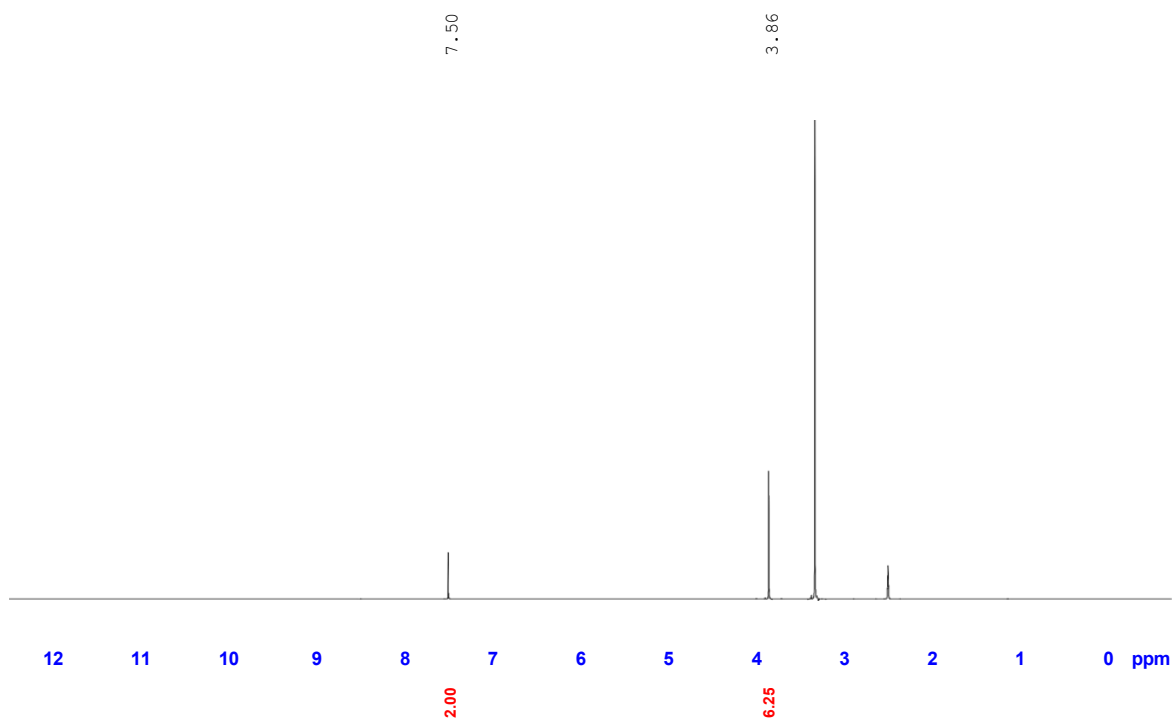

Figure S63. <sup>13</sup>C-NMR spectrum of compound **4e** (DMSO-*d*<sub>6</sub>).

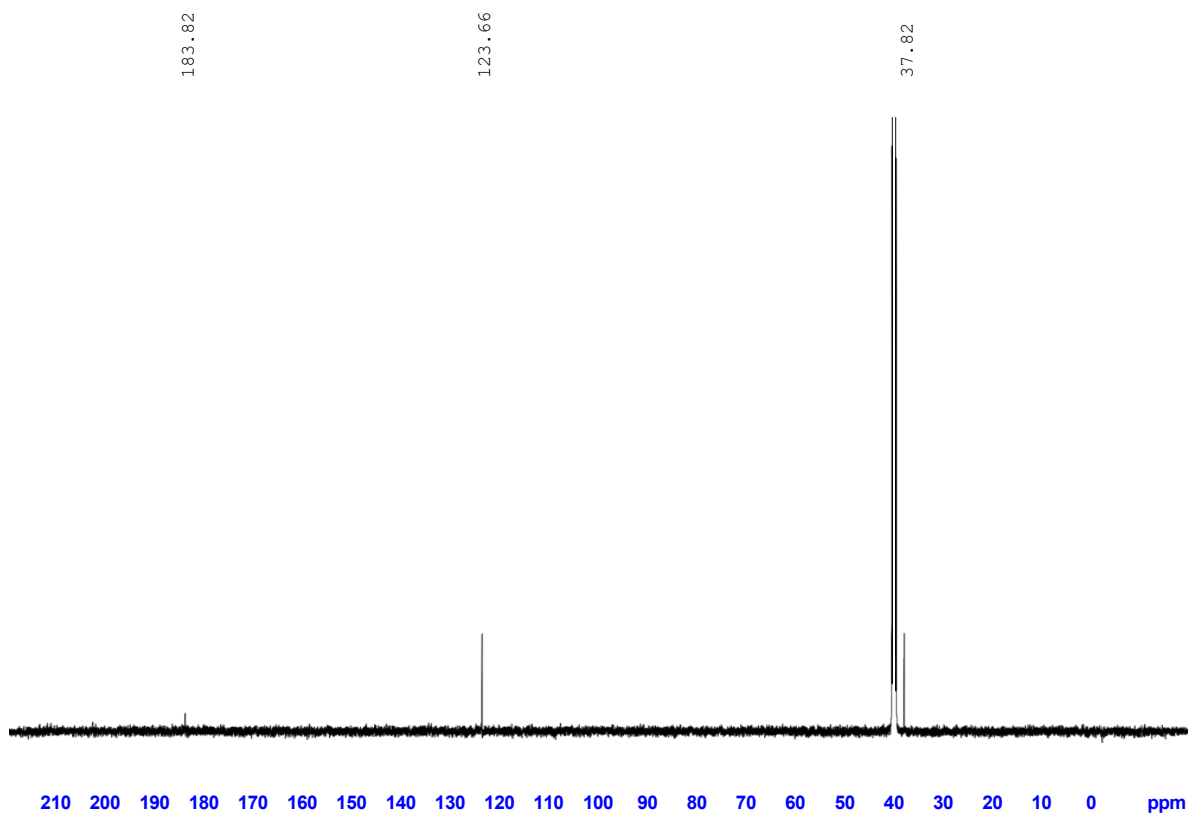



Figure S64.  $^1\text{H}$ -NMR spectrum of compound **4f** ( $\text{DMSO-}d_6$ ).

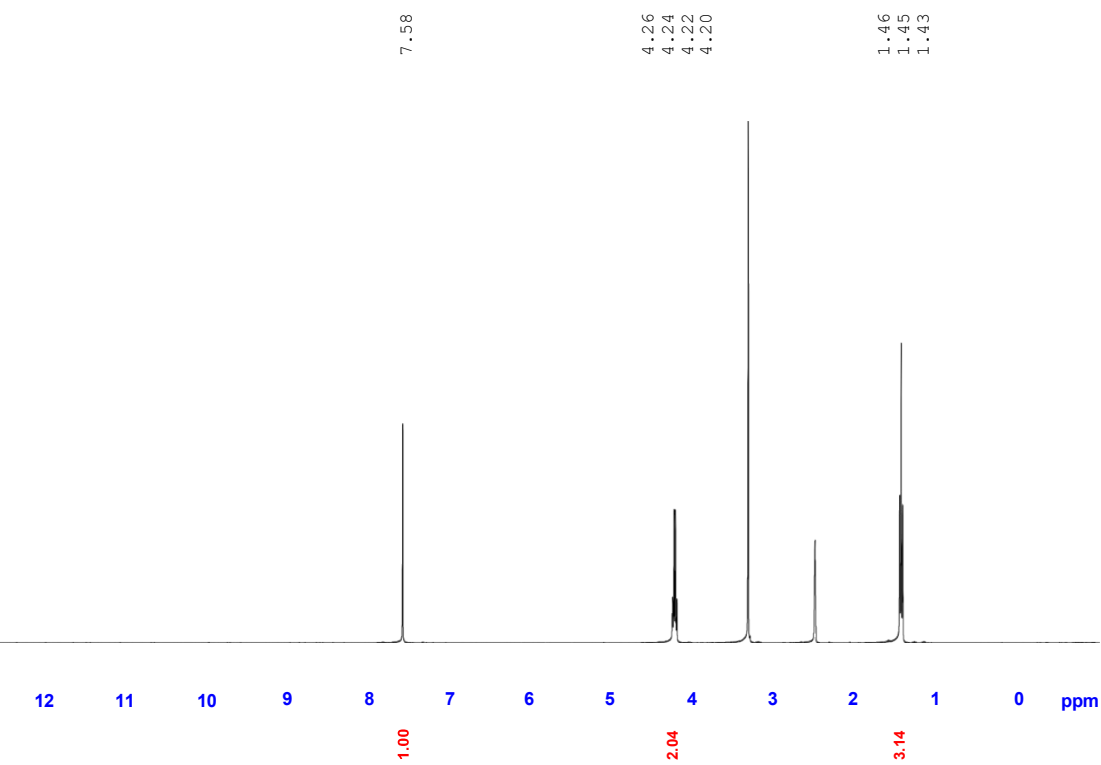

Figure S65.  $^{13}\text{C}$ -NMR spectrum of compound **4f** ( $\text{DMSO-}d_6$ ).

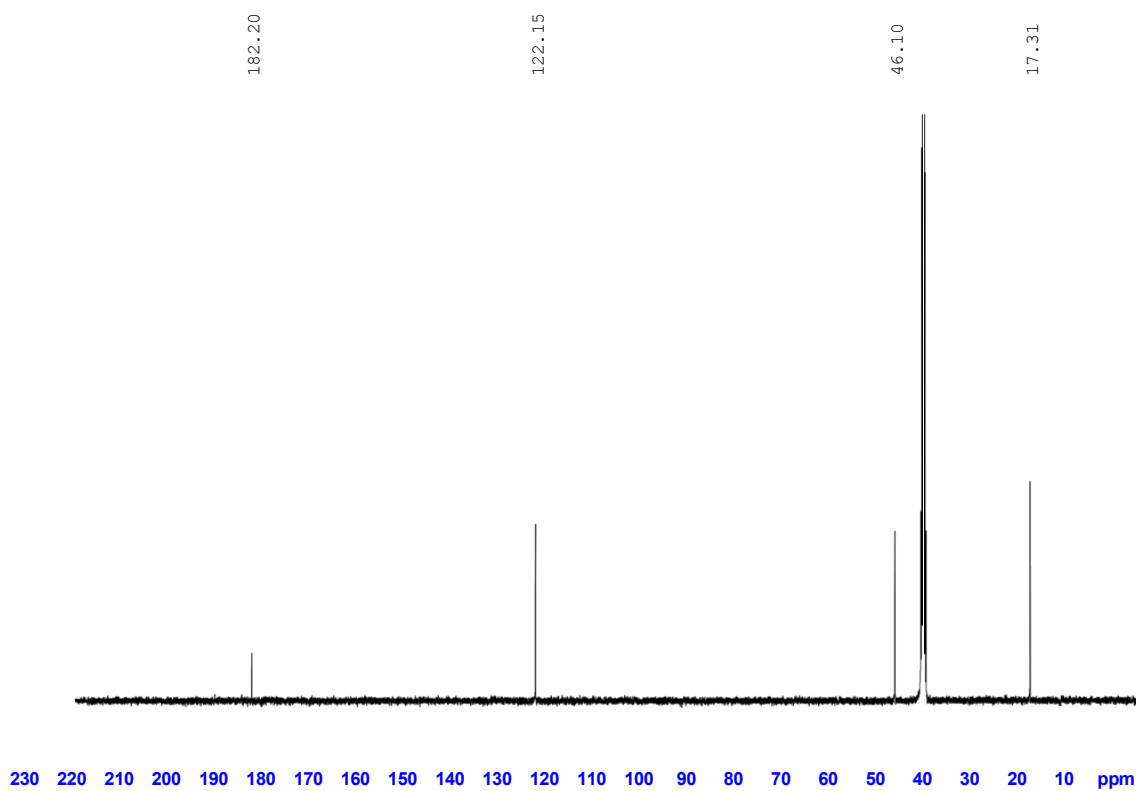

Figure S66.  $^1\text{H}$ -NMR spectrum of compound **4g** ( $\text{DMSO-}d_6$ ).

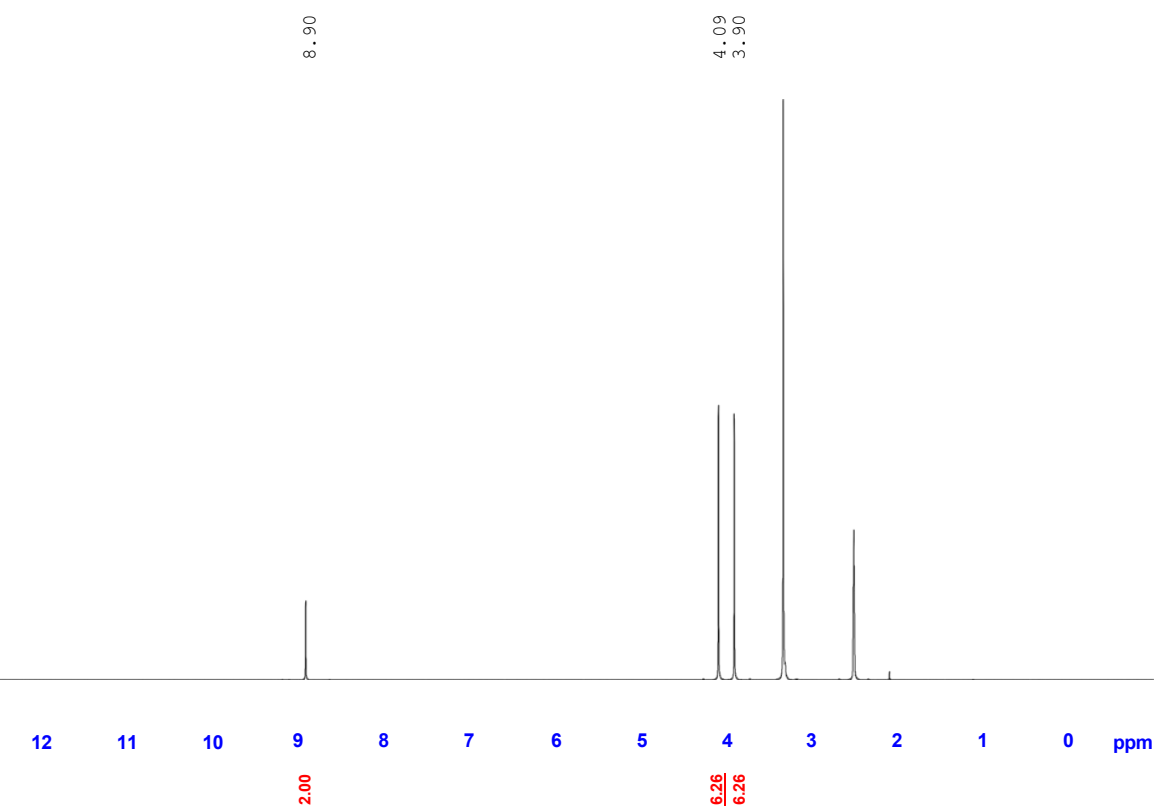

Figure S67. <sup>13</sup>C-NMR spectrum of compound **4g** (DMSO-*d*<sub>6</sub>).

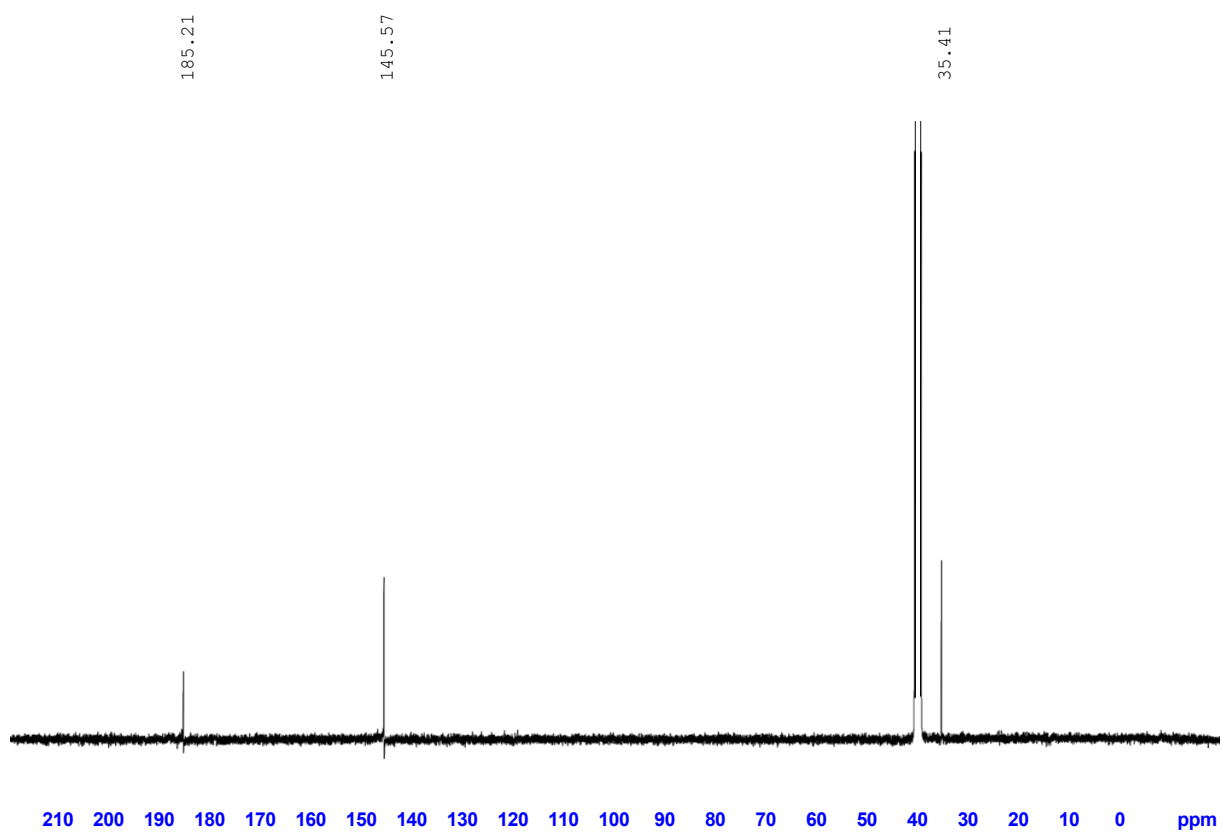

Figure S68.  $^1\text{H}$ -NMR spectrum of compound **4h** ( $\text{DMSO-}d_6$ ).

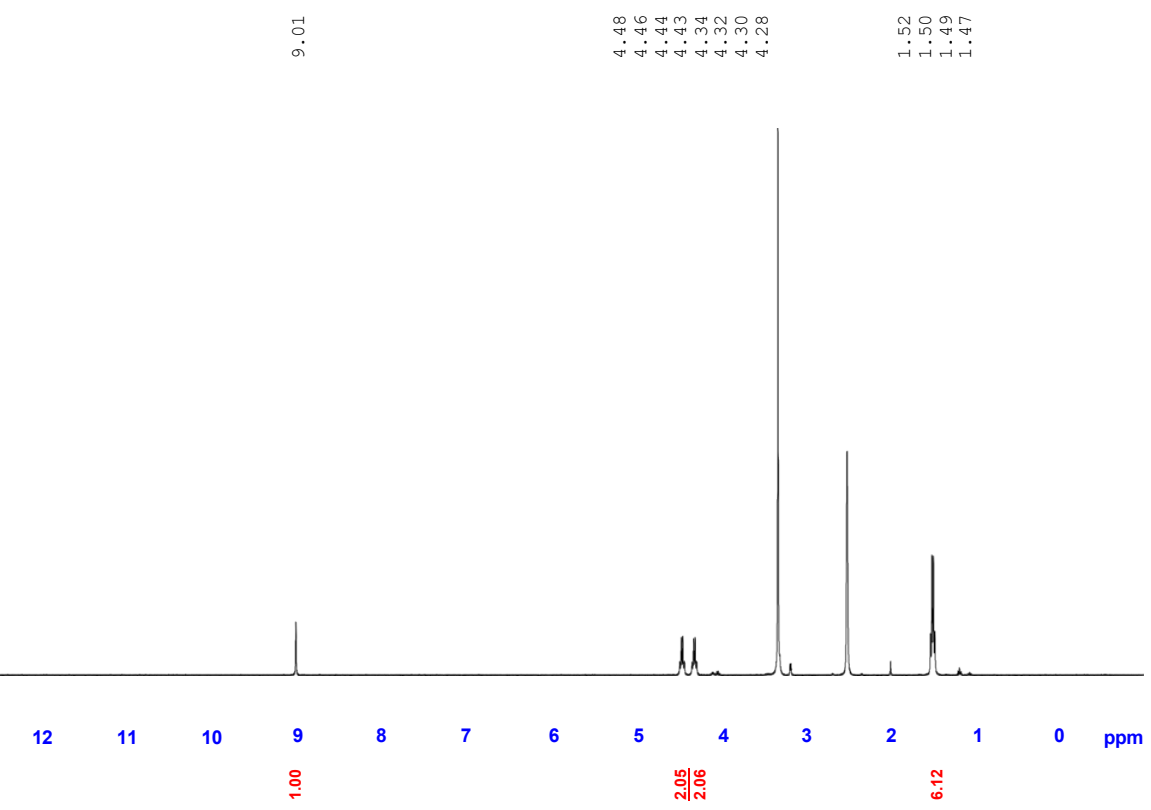

Figure S69.  $^{13}\text{C}$ -NMR spectrum of compound **4h** ( $\text{DMSO-}d_6$ ).

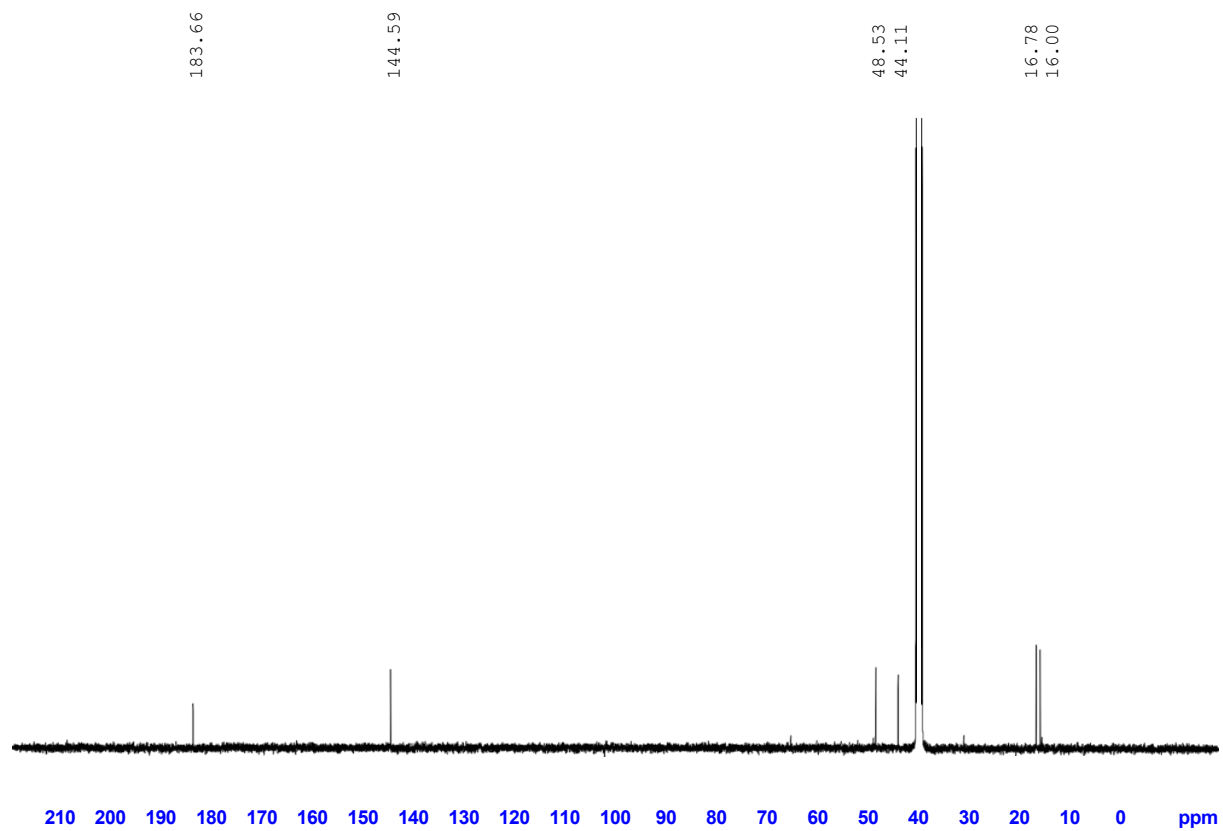

Figure S70.  $^1\text{H}$ -NMR spectrum of compound **2a** ( $\text{DMSO-}d_6$ ).

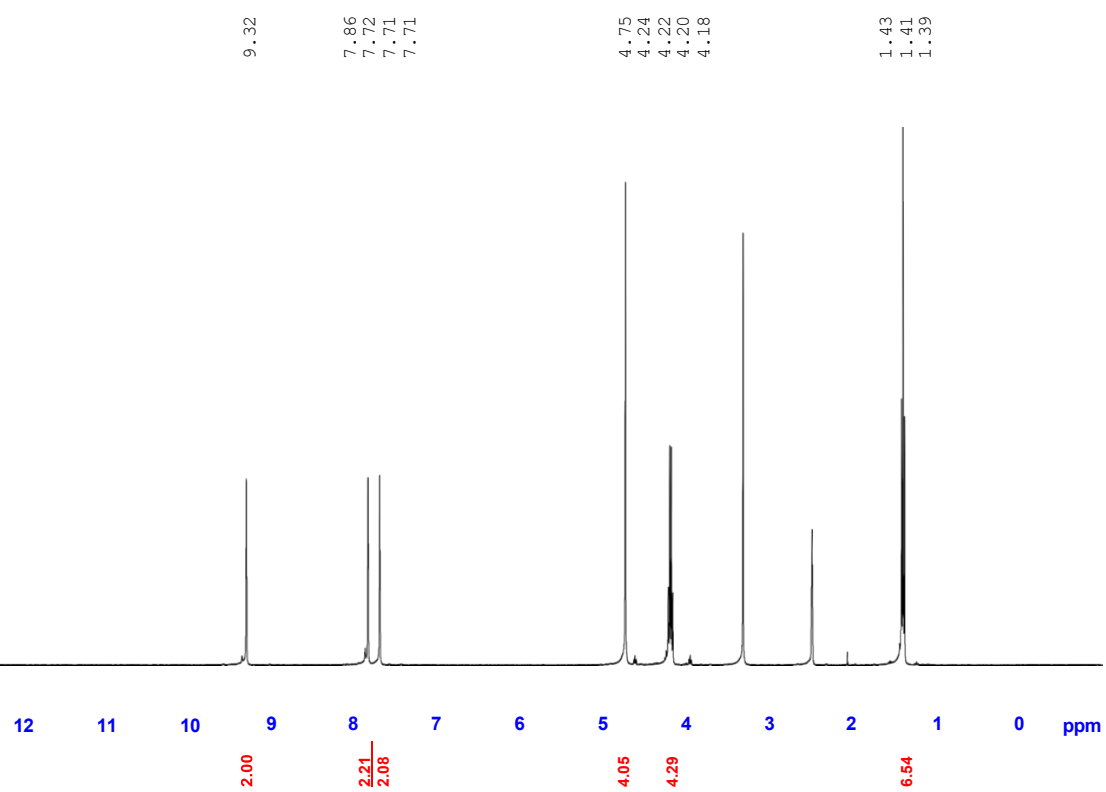

Figure S71. <sup>13</sup>C-NMR spectrum of compound **2a** (DMSO-*d*<sub>6</sub>).

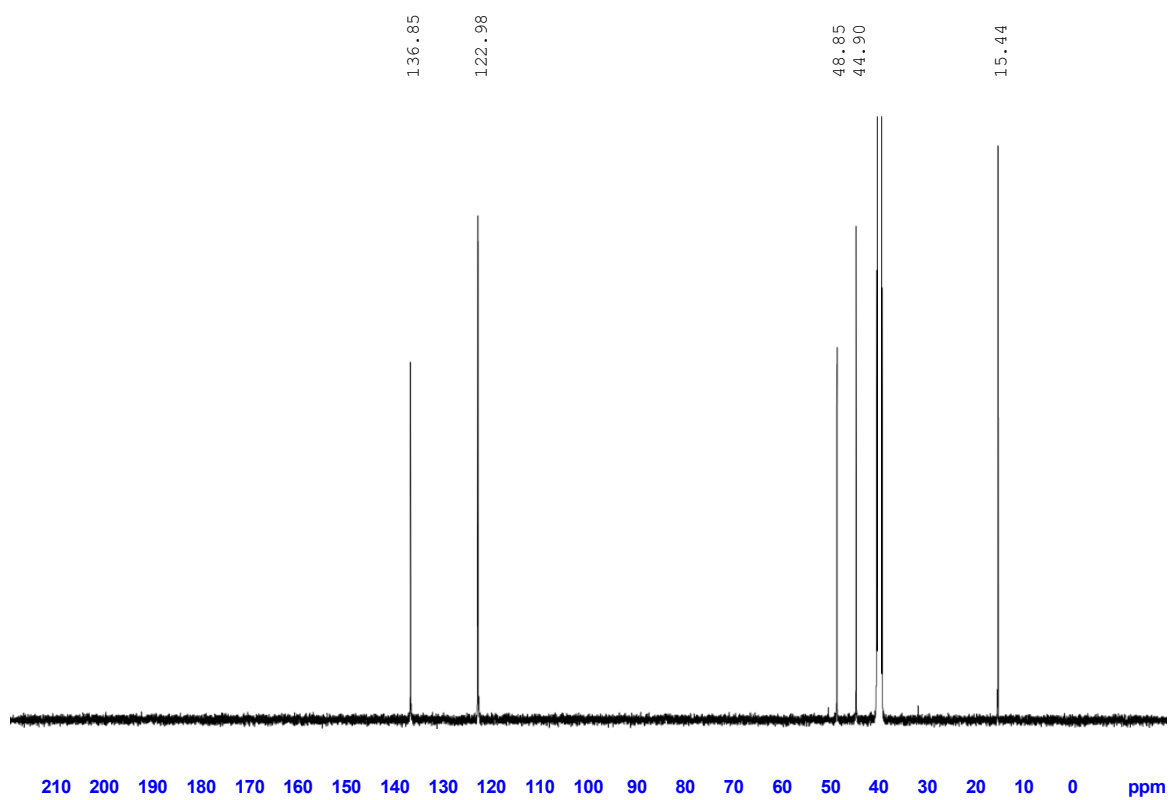

Figure S72.  $^1\text{H-NMR}$  spectrum of compound **2b** ( $\text{DMSO-}d_6$ ).



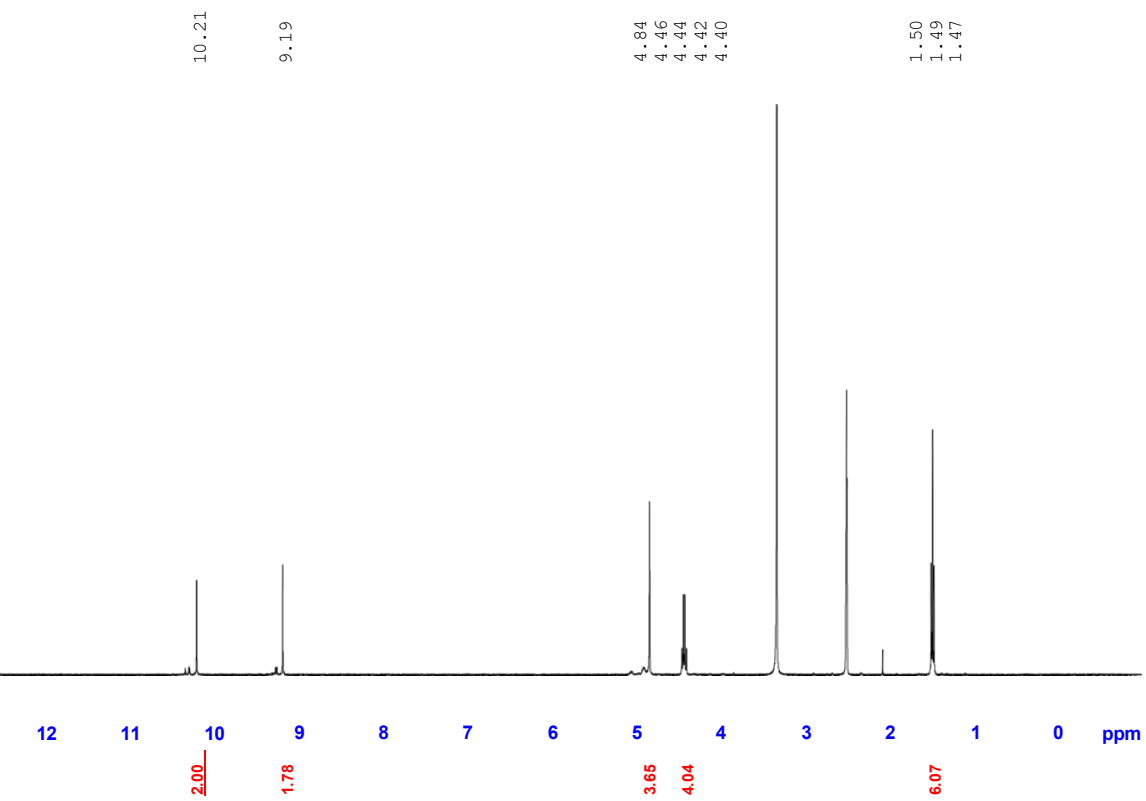

Figure S73. <sup>13</sup>C-NMR spectrum of compound **2b** (DMSO-*d*<sub>6</sub>).

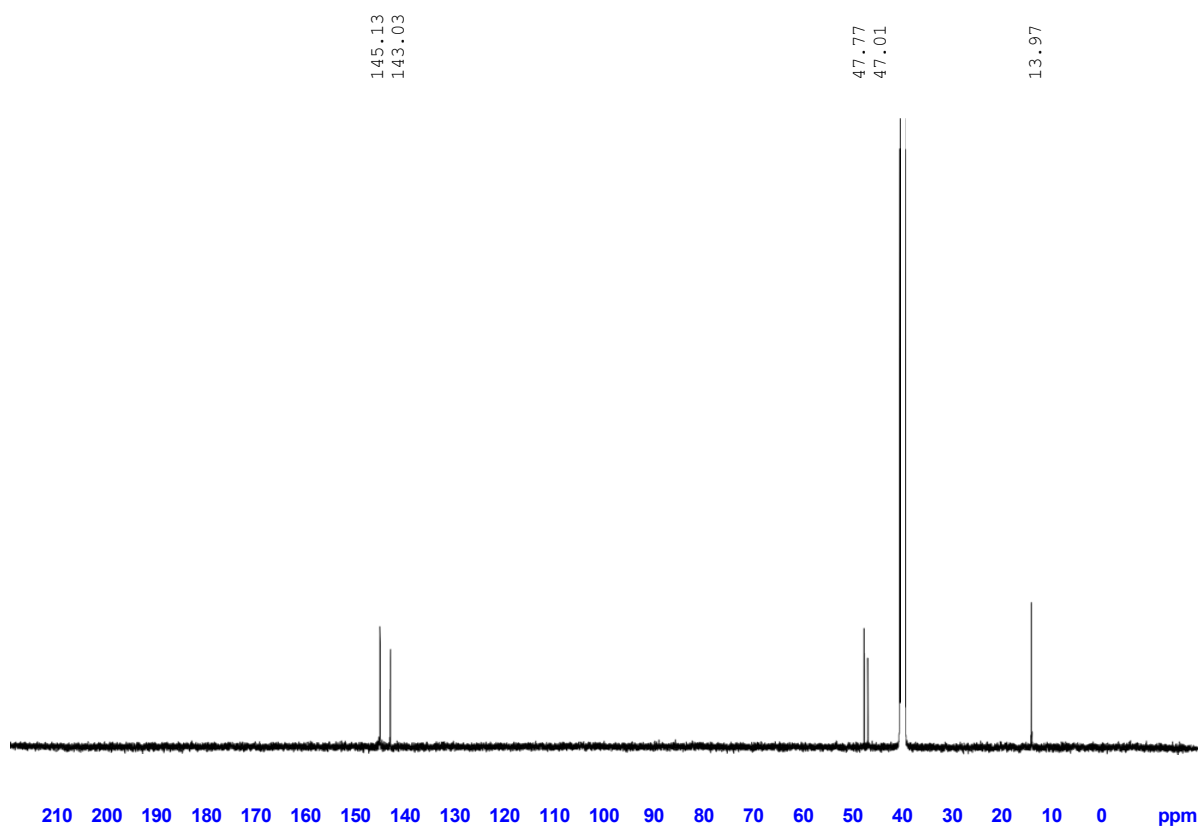

Figure S74.  $^1\text{H-NMR}$  spectrum of compound **2c** ( $\text{DMSO-}d_6$ ).

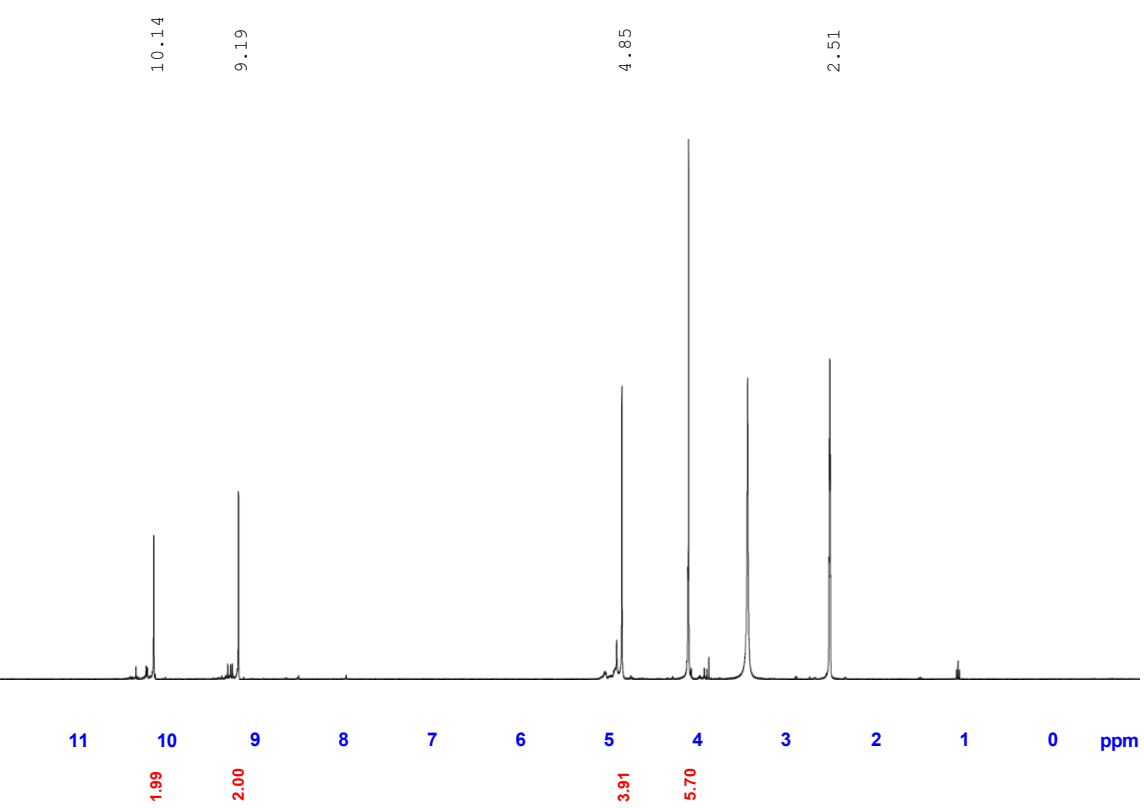

Figure S75.  $^{13}\text{C}$ -NMR spectrum of compound **2c** ( $\text{DMSO-}d_6$ ).

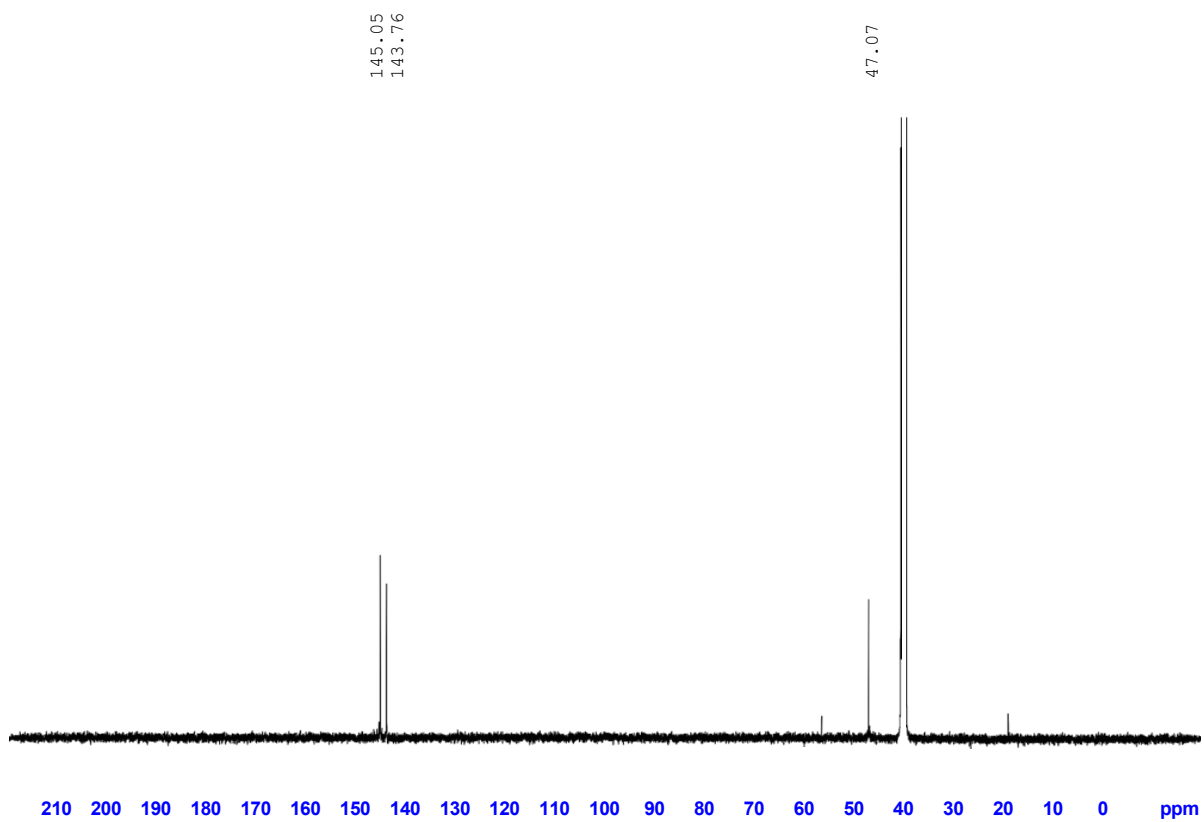

Figure S76.  $^1\text{H-NMR}$  spectrum of compound **5a** ( $\text{DMSO-}d_6$ ).

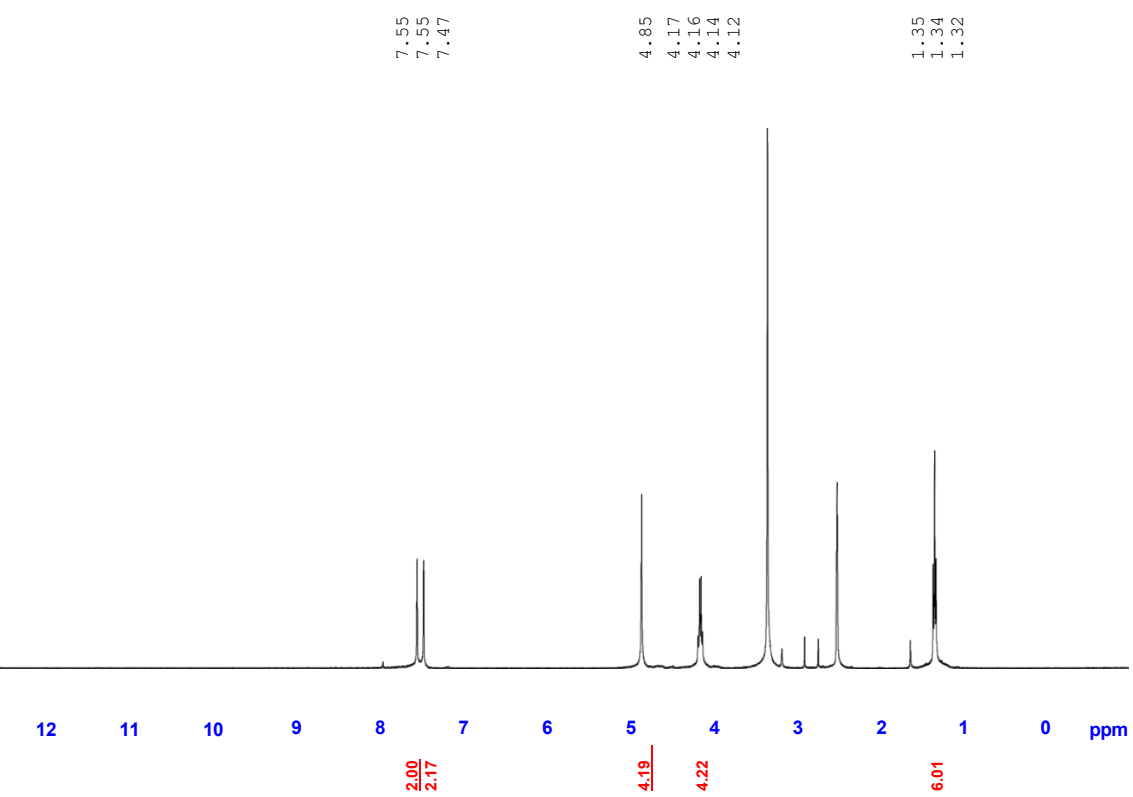

Figure S77. <sup>13</sup>C-NMR spectrum of compound **5a** (DMSO-*d*<sub>6</sub>).

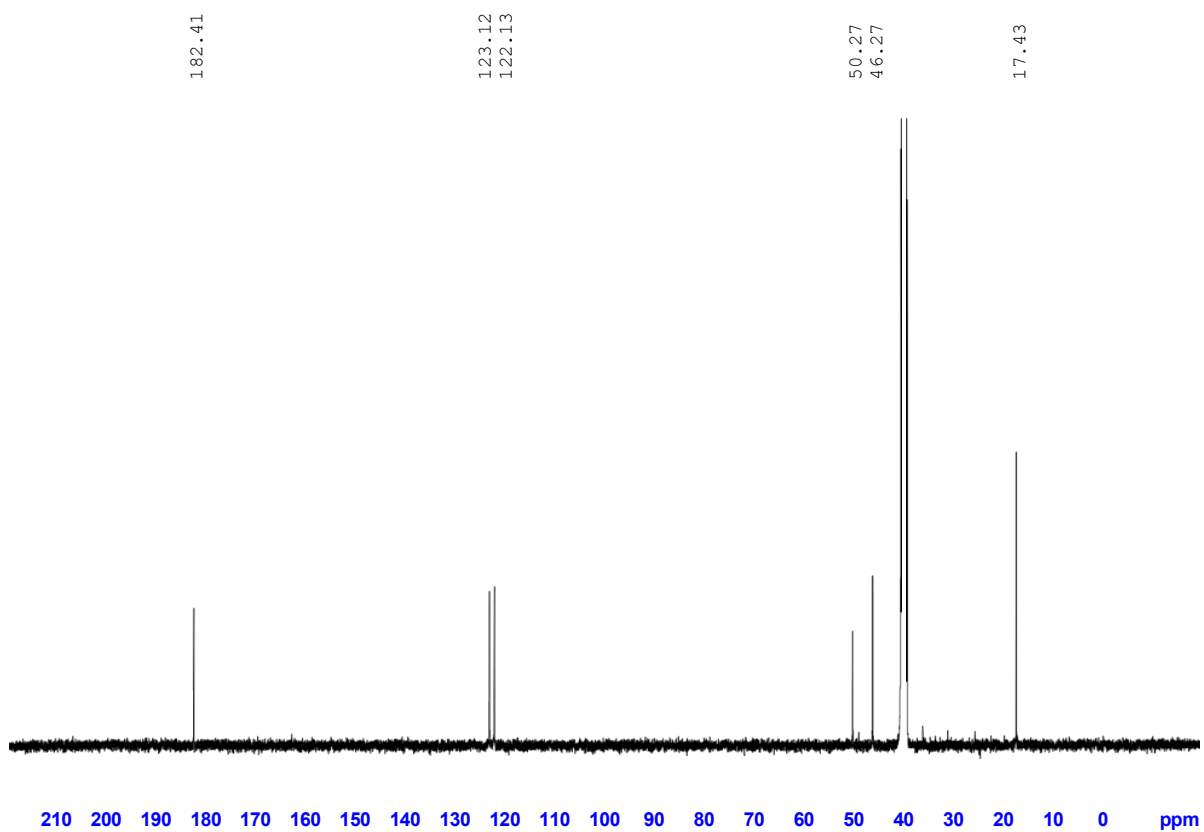

Figure S78.  $^{13}\text{C}$ -NMR spectrum of compound **5b** ( $\text{DMSO-}d_6$ ).

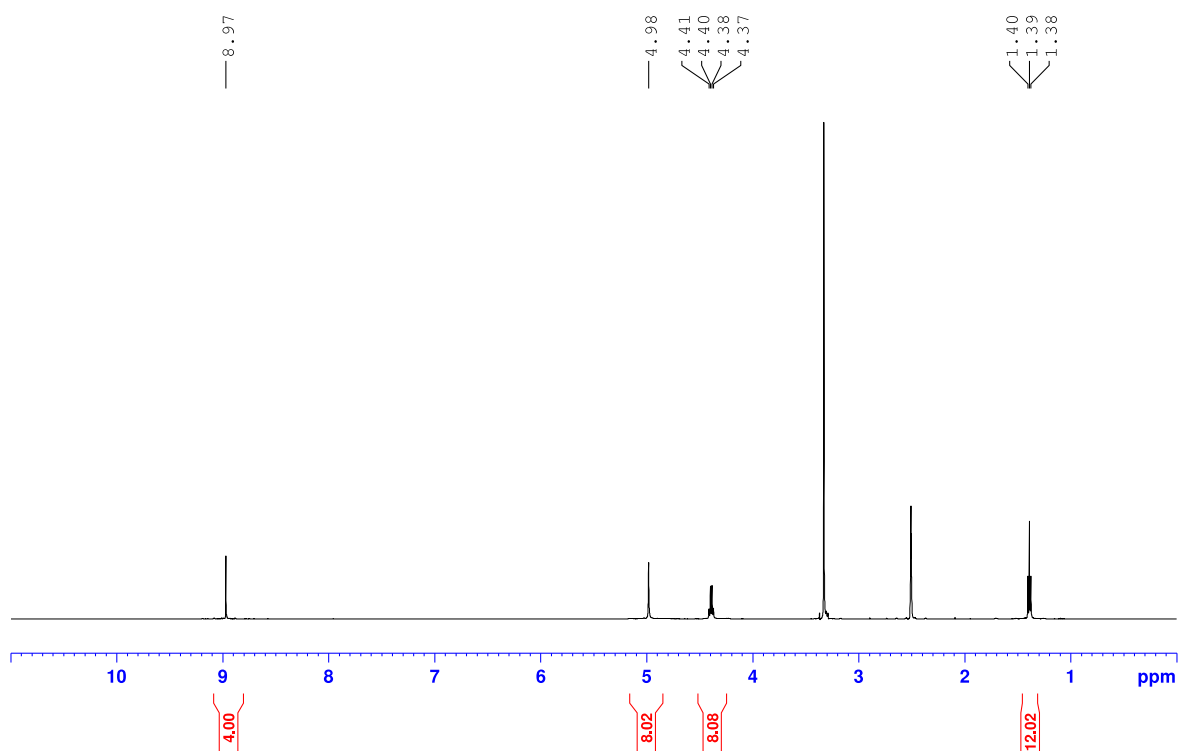

Figure S79.  $^1\text{H}$ -NMR spectrum of compound **5b** ( $\text{DMSO-}d_6$ ).

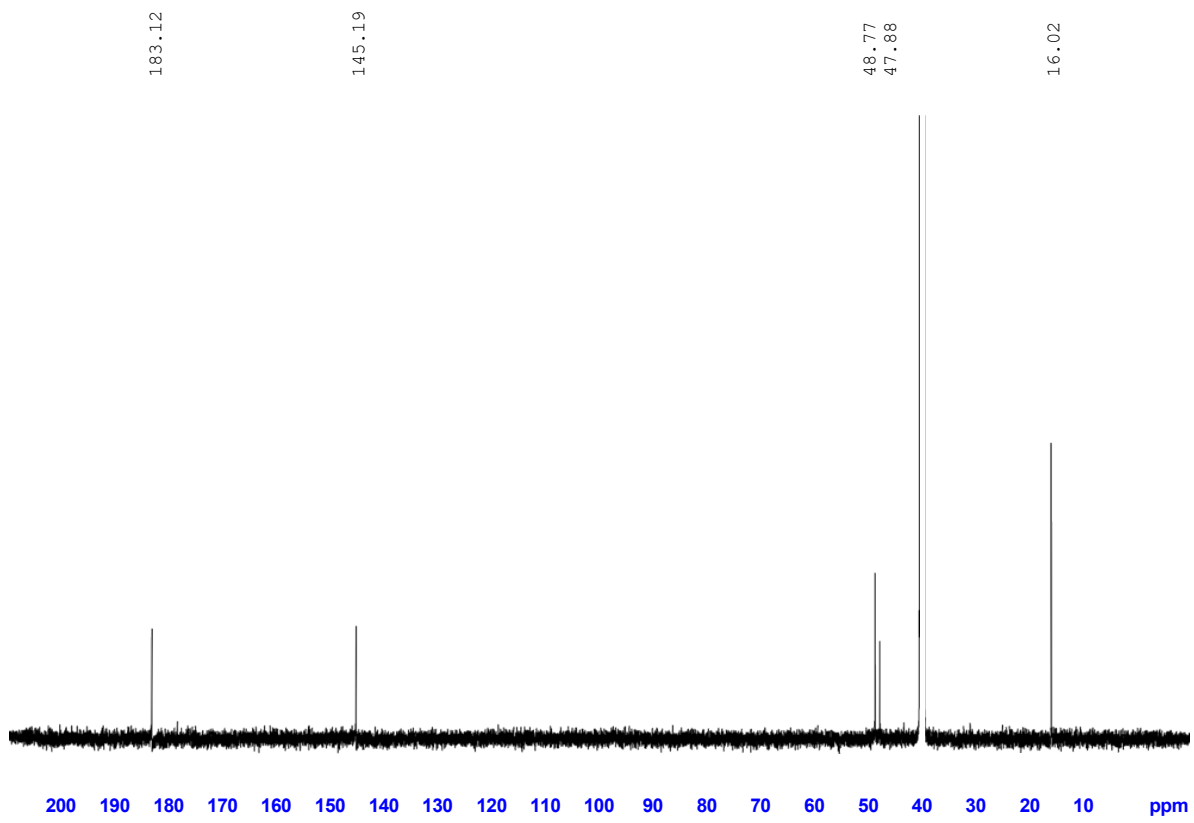

Figure S80.  $^1\text{H}$ -NMR spectrum of compound **5c** ( $\text{DMSO-}d_6$ ).

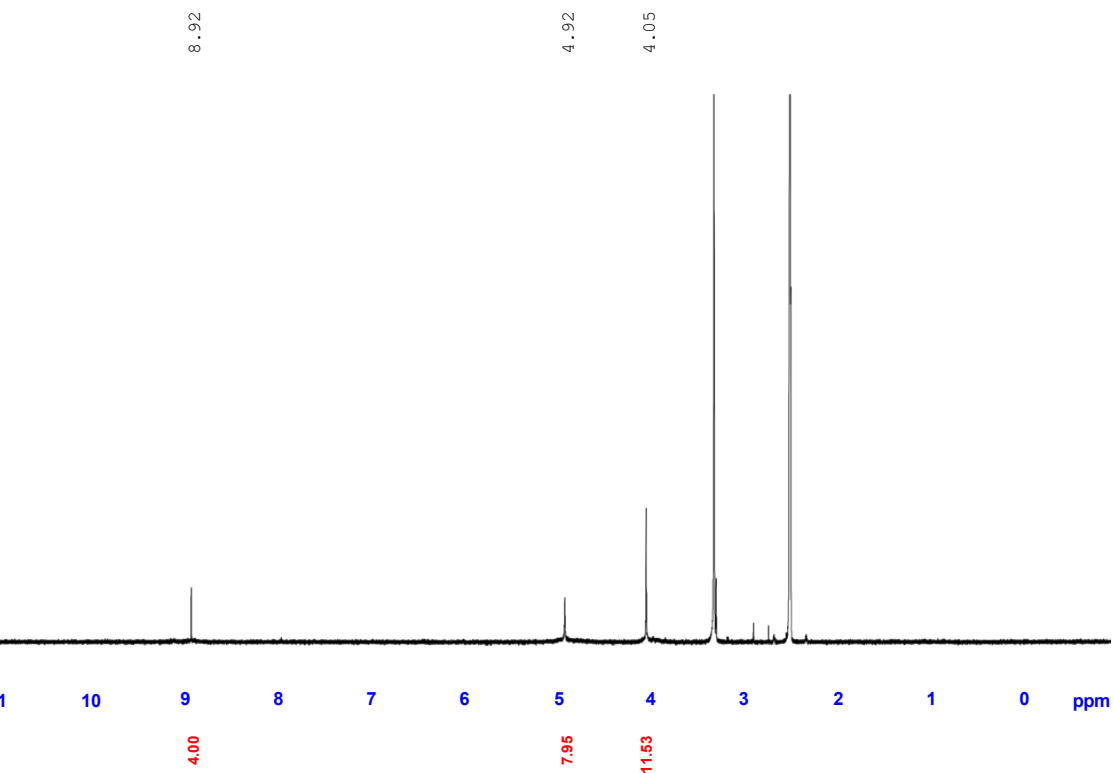

Figure S81.  $^{13}\text{C}$ -NMR spectrum of compound **5c** ( $\text{DMSO-}d_6$ ).



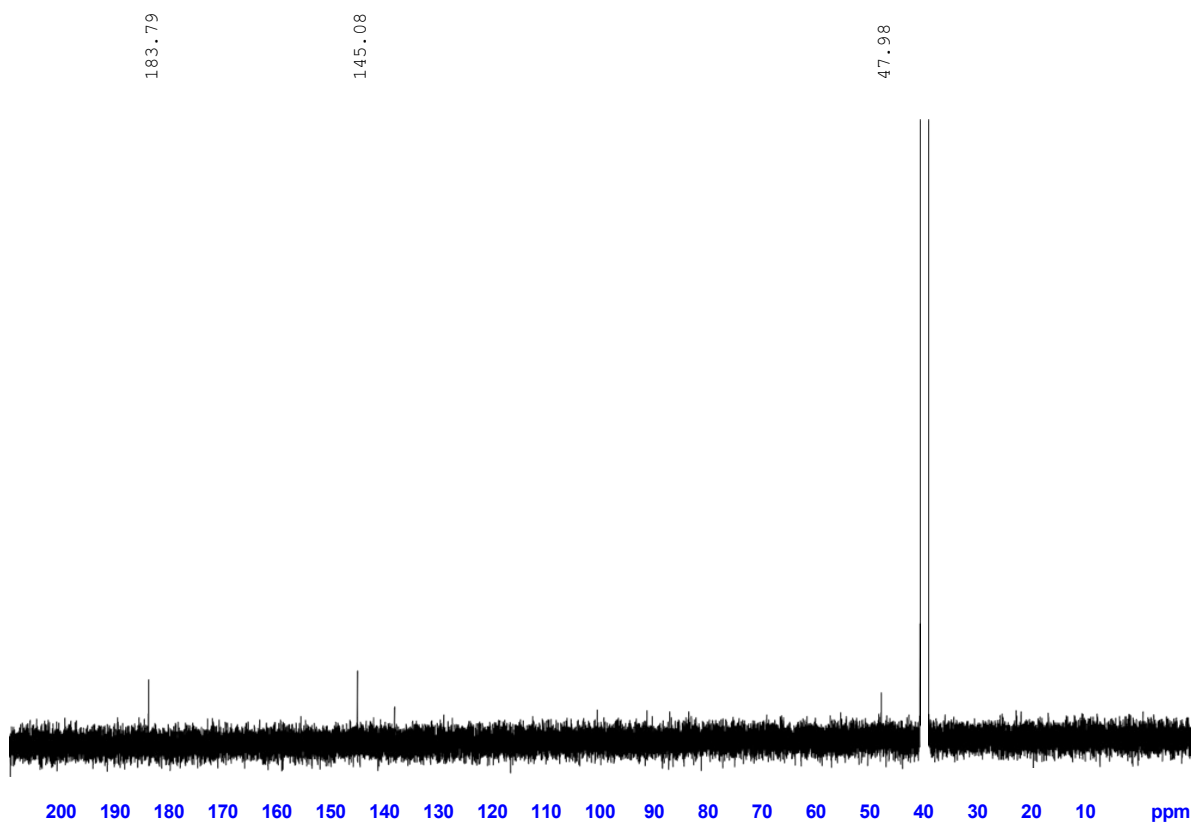

## High Resolution Mass Spectra and Mass Spectra

Figure S82. HRMS spectra of compound 4a.

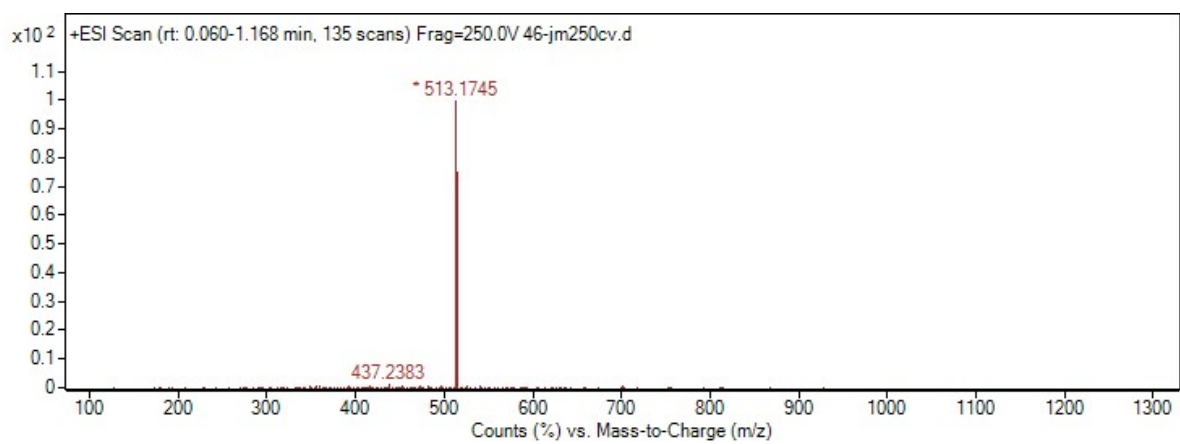

Figure S83. HRMS spectra of compound **4b**.

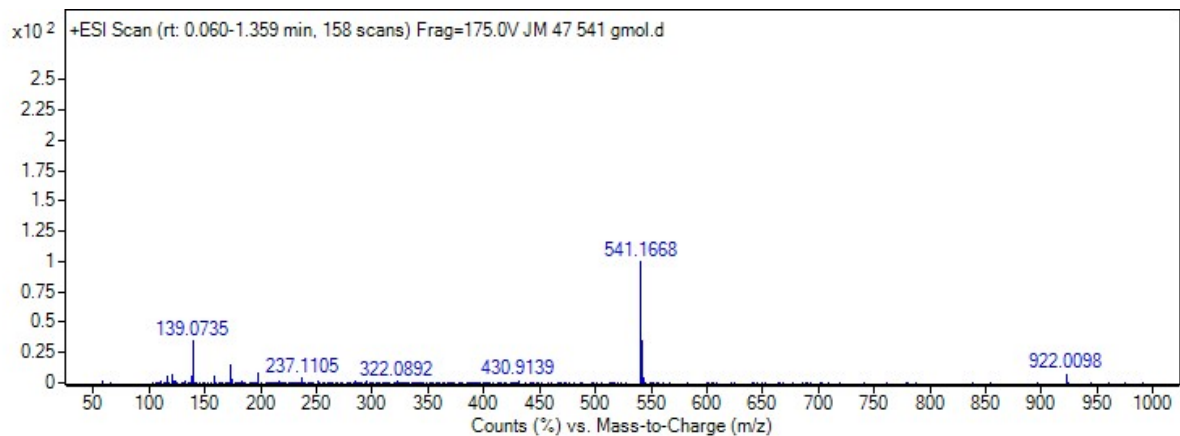

Figure S84. HRMS spectra of compound **4c**.

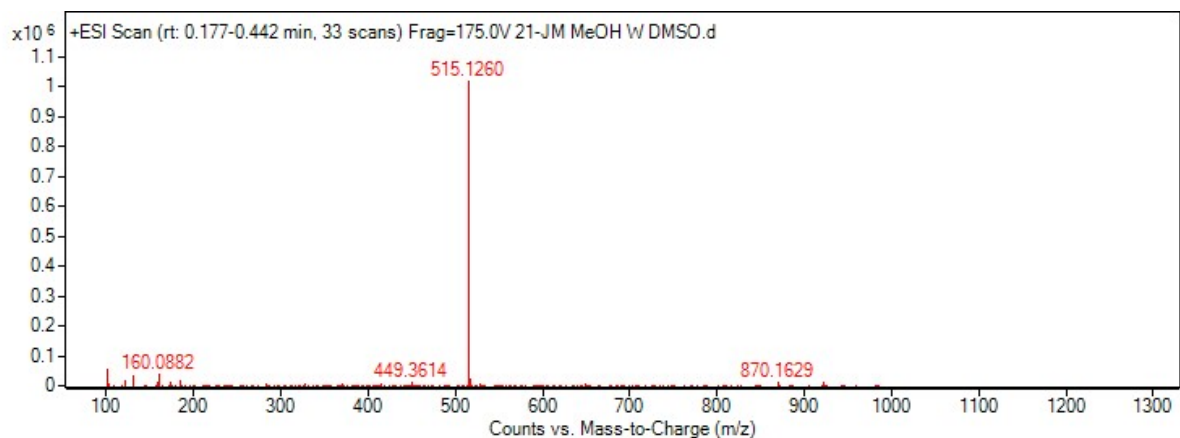

Figure S85. HRMS spectra of compound **4d**.

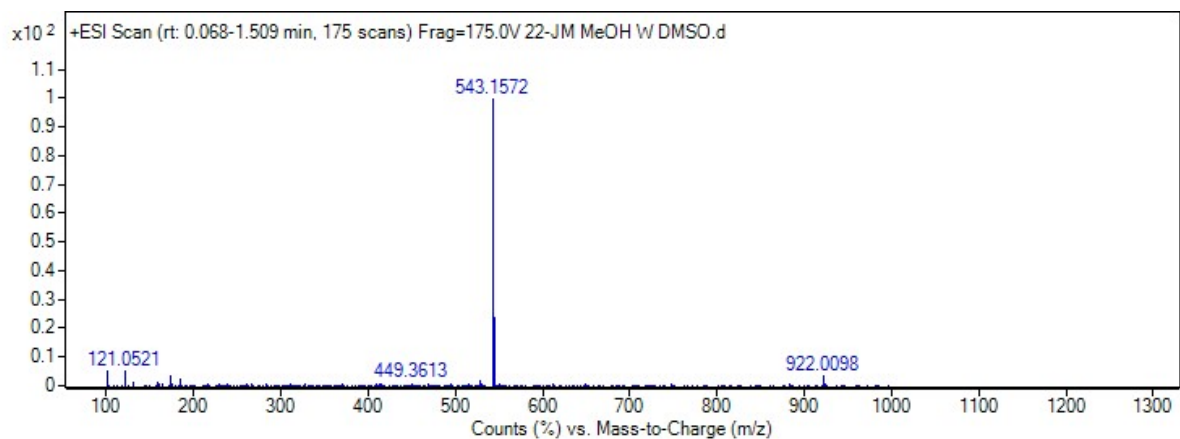

Figure S86. HRMS spectra of compound **4e**.

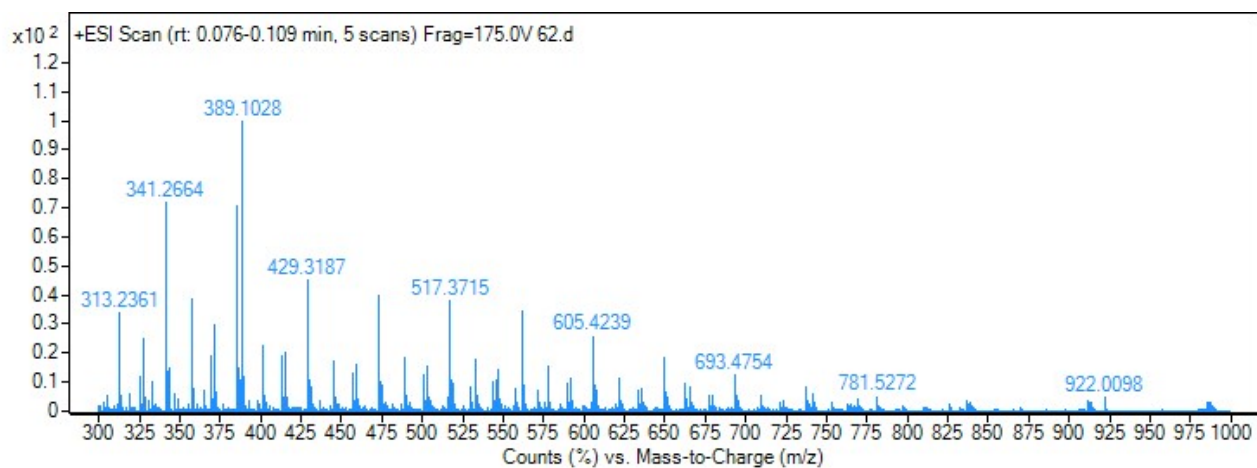

Figure S87. HRMS spectra of compound **4f**.

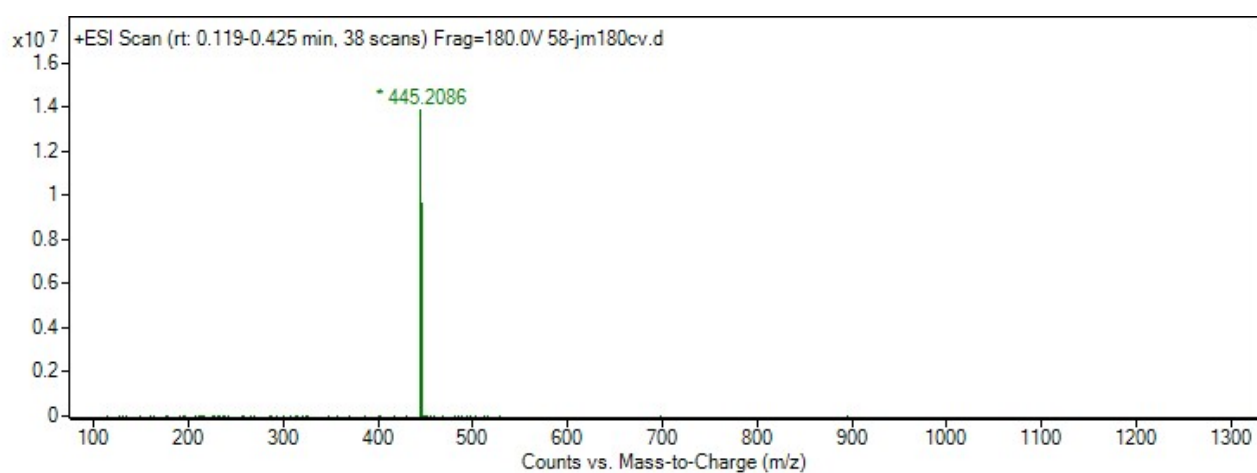

Figure S88. HRMS spectra of compound **4g**.

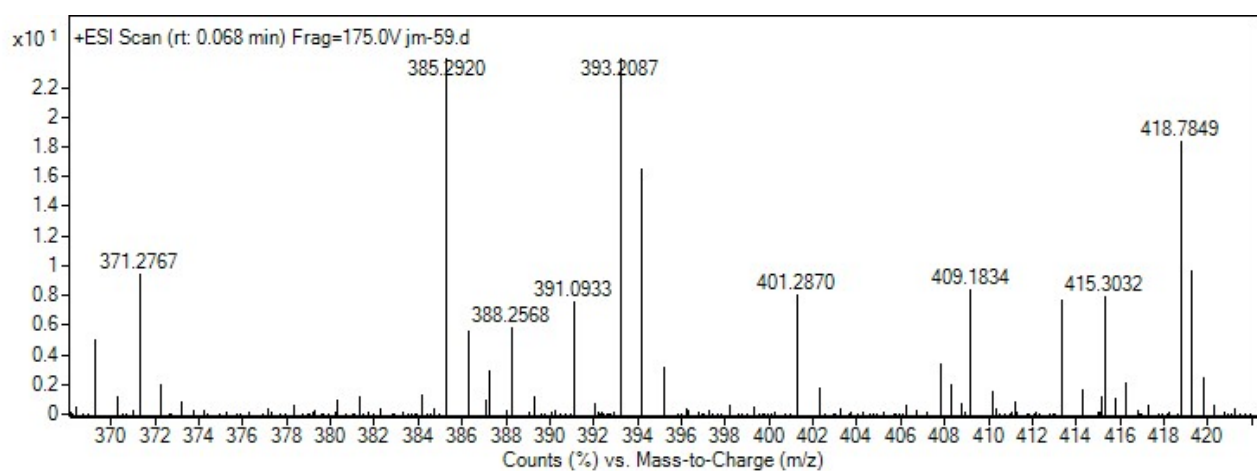

Figure S89. HRMS spectra of compound **4h**.

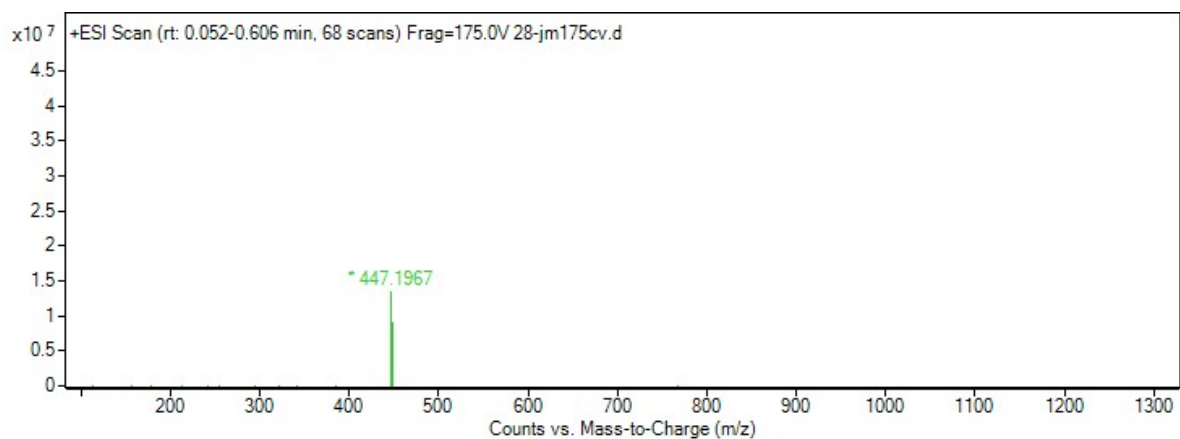

Figure S90. LRMS spectra of compound **5a**.

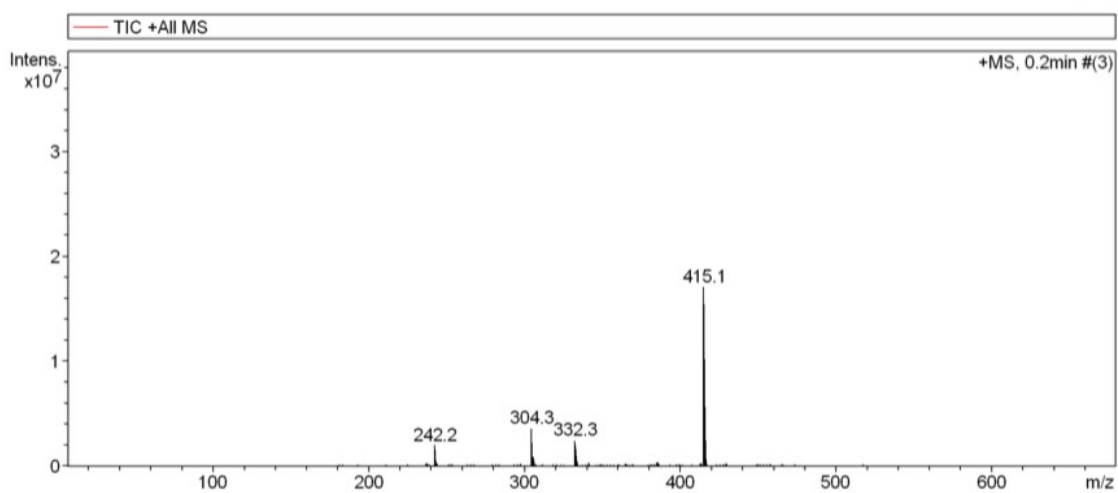

Figure S91. HRMS spectra of compound **5b**.

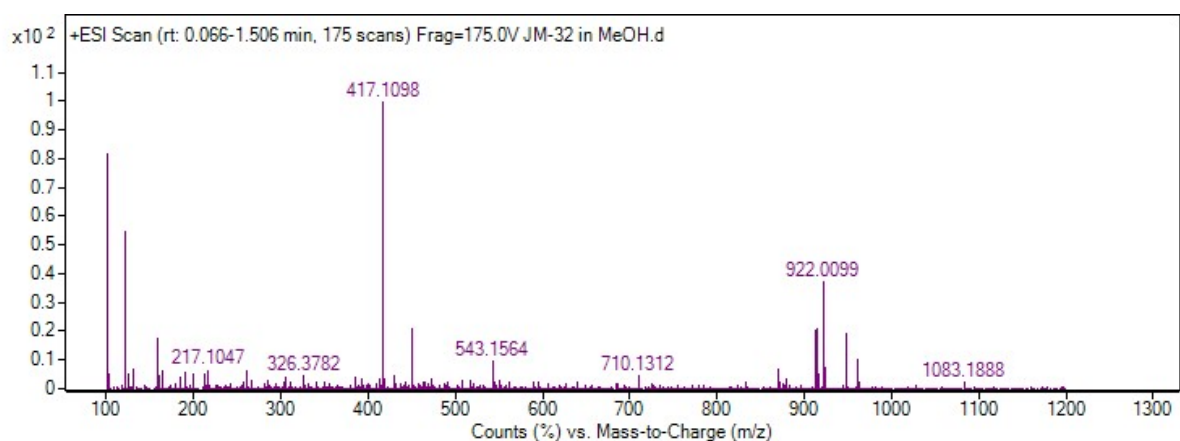

## Computational ESI

The following tables are total energies (Eh) for all species presented in the work. Level of theory for each step shown in table. The solvated free energy is calculated using the following equation:

$$\text{Solvated free energy} = \text{Solv Energy} + (\text{Free energy} - \text{Energy})$$

**Table S4. Free carbene ligand energies**

| ligands  | PBE-D3BJ/def2-tzvp |             | PWPB95-D3BJ/def2-tzvpp |                        |
|----------|--------------------|-------------|------------------------|------------------------|
|          | Energy             | Free energy | Solv Energy (DCE)      | Solv free energy (DCE) |
| <b>a</b> | -496.111815        | -495.973036 | -496.361275            | -496.222497            |
| <b>c</b> | -512.151355        | -512.024047 | -512.401736            | -512.2744288           |
| <b>e</b> | -304.534703        | -304.442796 | -304.692637            | -304.6007294           |
| <b>g</b> | -320.57445         | -320.493747 | -320.734439            | -320.6537365           |

**Table S5. Bis and mono ligated carbene complexes**

| Complexes              | PBE-D3BJ/def2-tzvp |             | PWPB95-D3BJ/def2-tzvpp |                        |
|------------------------|--------------------|-------------|------------------------|------------------------|
|                        | Energy             | Free energy | Solv Energy (DCE)      | Solv free energy (DCE) |
| <b>3a bis carbene</b>  | -1139.1855         | -1138.88367 | -1139.60546            | -1139.303632           |
| <b>3a mono carbene</b> | -642.955803        | -642.818132 | -643.157185            | -643.0195147           |
| <b>3c bis carbene</b>  | -1171.24366        | -1170.96553 | -1171.67295            | -1171.394816           |
| <b>3c mono carbene</b> | -658.981388        | -658.854644 | -659.189313            | -659.0625693           |
| <b>3e bis carbene</b>  | -756.028806        | -755.823043 | -756.268047            | -756.0622838           |
| <b>3e mono</b>         | -451.375937        | -451.285833 | -451.489583            | -451.3994792           |

|                        |             |             |             |              |
|------------------------|-------------|-------------|-------------|--------------|
| <b>carbene</b>         |             |             |             |              |
| <b>3g bis carbene</b>  | -788.089142 | -787.907634 | -788.339294 | -788.157786  |
| <b>3g mono carbene</b> | -467.402888 | -467.324369 | -467.523639 | -467.4451197 |
| <b>4a bis carbene</b>  | -1127.92252 | -1127.62079 | -1128.33604 | -1128.034316 |
| <b>4a mono carbene</b> | -631.697786 | -631.560513 | -631.856576 | -631.7193035 |
| <b>4c bis carbene</b>  | -1159.98283 | -1159.70389 | -1160.40164 | -1160.122705 |
| <b>4c mono carbene</b> | -647.723021 | -647.596527 | -647.886437 | -647.7599435 |
| <b>4e bis carbene</b>  | -744.794961 | -744.588753 | -745.00008  | -744.7938748 |
| <b>4e mono carbene</b> | -440.131797 | -440.042073 | -440.190428 | -440.1007042 |
| <b>4g bis carbene</b>  | -776.856924 | -776.674778 | -777.06941  | -776.8872606 |
| <b>4g mono carbene</b> | -456.158117 | -456.078953 | -456.22184  | -456.1426719 |

**Table S6. Intermediates and Transition states for the decomposition mechanisms for 3e.**

|                           | PBE-D3BJ/def2-tzvp |             | PWPB95-D3BJ/def2-tzvpp |                         |
|---------------------------|--------------------|-------------|------------------------|-------------------------|
|                           | Energy             | Free energy | Solv Energy (DMSO)     | Solv free energy (DMSO) |
| <b>H<sub>2</sub>O</b>     | -76.3773           | -76.3749    | -76.4265               | -76.4242                |
| <b>AgI<sub>2</sub></b>    | -742.6193          | -742.6488   | -742.3500              | -742.3795               |
| <b>3e</b>                 | -756.0288          | -755.8230   | -756.2731              | -756.0673               |
| <b>3e-AgI<sub>2</sub></b> | -1,498.7743        | -1,498.5767 | -1,498.6415            | -1,498.4439             |
| <b>TS1<sub>3c</sub></b>   | -1,498.7476        | -1,498.5516 | -1,498.6243            | -1,498.4283             |
| <b>[3e-I]<sub>2</sub></b> | -1,498.7704        | -1,498.5724 | -1,498.6411            | -1,498.4432             |
| <b>[3e-I]</b>             | -749.3696          | -749.2832   | -749.3113              | -749.2249               |

|                             |           |           |           |           |
|-----------------------------|-----------|-----------|-----------|-----------|
| <b>[3e-I]<sub>H2O</sub></b> | -825.7639 | -825.6582 | -825.7404 | -825.6346 |
| <b>TS2<sub>3c</sub></b>     | -825.7311 | -825.6243 | -825.7075 | -825.6008 |
| <b>[Ag-OH].L-H</b>          | -825.7391 | -825.6310 | -825.7191 | -825.6109 |
| <b>[I-Ag-OH]</b>            | -520.6268 | -520.6450 | -520.5183 | -520.5365 |
| <b>LH</b>                   | -304.9620 | -304.8565 | -305.2038 | -305.0984 |
| <b>3e.H<sub>2</sub>O</b>    | -832.4175 | -832.1928 | -832.7009 | -832.4762 |
| <b>TS3<sub>3e</sub></b>     | -832.3863 | -832.1605 | -832.6698 | -832.4440 |
| <b>[LAgOH].LH</b>           | -832.4055 | -832.1804 | -832.6836 | -832.4586 |
| <b>[LAgOH]</b>              | -527.3887 | -527.2894 | -527.4837 | -527.3844 |
| <b>[LAgH<sub>2</sub>O]</b>  | -527.8007 | -527.6898 | -527.9552 | -527.8442 |

**Table S7. Intermediates and Transition states for the decomposition mechanisms for 3c.**

|                   | <b>PBE-D3BJ/def2-tzvvp</b> |                    | <b>PWPB95-D3BJ/def2-tzvpp</b> |                                        |
|-------------------|----------------------------|--------------------|-------------------------------|----------------------------------------|
|                   | <b>Energy</b>              | <b>Free energy</b> | <b>Solv Energy<br/>(DMSO)</b> | <b>Solv free<br/>energy<br/>(DMSO)</b> |
| <b>3c</b>         | -1,171.2437                | -1,170.9655        | -1,171.6789                   | -1,171.4007                            |
| <b>3c-AgI2</b>    | -1,913.9926                | -1,913.7236        | -1,914.0498                   | -1,913.7808                            |
| <b>TS1 3c</b>     | -1,913.9751                | -1,913.7052        | -1,914.0423                   | -1,913.7724                            |
| <b>[3c-I]2</b>    | -1,913.9938                | -1,913.7238        | -1,914.0526                   | -1,913.7826                            |
| <b>[3c-I]</b>     | -956.9783                  | -956.8551          | -957.0130                     | -956.8898                              |
| <b>3c-I + H2O</b> | -1,033.3722                | -1,033.2309        | -1,033.4430                   | -1,033.3018                            |
| <b>TS2 3c</b>     | -1,033.3421                | -1,033.1992        | -1,033.4125                   | -1,033.2696                            |
| <b>[LAgH2O].L</b> | -1,033.3452                | -1,033.2036        | -1,033.4121                   | -1,033.2705                            |
| <b>[LAgH2O]</b>   | -521.1536                  | -521.1605          | -520.9931                     | -521.0000                              |
| <b>TS3 3c</b>     | -1,033.3445                | -1,033.2047        | -1,033.4091                   | -1,033.2693                            |
| <b>[LAgOH].LH</b> | -1,033.3452                | -1,033.2036        | -1,033.4121                   | -1,033.2705                            |
| <b>[LAgOH]</b>    | -520.6268                  | -520.6450          | -520.5183                     | -520.5365                              |
| <b>LH</b>         | -512.5623                  | -512.4223          | -512.8853                     | -512.7453                              |

## Coordinates for calculated structures

### Free carbene

**a**

|   |                   |                   |                   |
|---|-------------------|-------------------|-------------------|
| C | -2.24022097510778 | 1.64735111619209  | -0.10726786016784 |
| N | -1.02078735402482 | 2.29610454781694  | -0.10880984384869 |
| C | 0.05845182716848  | 1.41221334896967  | -0.07463825803467 |
| C | -0.47942237215058 | 0.16444655151147  | -0.04883853138972 |
| N | -1.86027416724611 | 0.33840489738282  | -0.07112600199661 |
| H | 1.09332431791449  | 1.72891518693042  | -0.03306395642677 |
| H | 0.00018126338848  | -0.80757457565880 | -0.00796592534005 |
| C | -2.81604596934260 | -0.75443293017166 | -0.06905342071048 |
| H | -3.81762292354632 | -0.31287249436351 | -0.06669767824932 |
| H | -2.68772916334322 | -1.38031864751338 | 0.82594486107173  |
| H | -2.69387037152429 | -1.38064168954803 | -0.96473912869491 |
| H | -0.61311699018178 | 7.59074861942290  | -0.23143837818412 |
| C | -0.69419852173700 | 6.50324539314674  | -0.20920996160135 |
| C | -1.85834155380010 | 5.89121097046887  | 0.26459630118636  |
| H | -2.69150145639477 | 6.50134847917517  | 0.61726494034354  |
| C | -1.96649235683511 | 4.50301370418321  | 0.30139222938812  |
| H | -2.86414987707605 | 4.00253556846828  | 0.66261573418094  |
| C | -0.90247544047234 | 3.71275954202238  | -0.14910050239026 |
| C | 0.26114779913482  | 4.31836945033494  | -0.63603636284564 |
| H | 1.07829561665361  | 3.70895097329379  | -1.02261603076477 |
| C | 0.36218644540381  | 5.71032322652069  | -0.65880126373554 |
| H | 1.27194380661920  | 6.17449352761497  | -1.04275376688993 |

**c**

|   |                   |                   |                   |
|---|-------------------|-------------------|-------------------|
| C | -2.19383852661069 | 1.68517912707436  | 0.02084834259893  |
| N | -1.02263236681364 | 2.34807443827517  | -0.18865596943466 |
| N | 0.08035334400748  | 1.54750206848540  | -0.45683763830474 |
| C | -0.42649859363749 | 0.34587541144394  | -0.41240380837713 |
| N | -1.77542805642577 | 0.38882965126536  | -0.13036161018660 |
| H | 0.14439749433114  | -0.56339207319891 | -0.57581289414163 |



|   |                   |                   |                   |
|---|-------------------|-------------------|-------------------|
| C | -2.65114031100171 | -0.76557111568495 | -0.01212003566627 |
| H | -3.64327573232527 | -0.39582398585548 | 0.26423295379244  |
| H | -2.28525377944125 | -1.45026892755603 | 0.76533762717678  |
| H | -2.71540760858242 | -1.30409171078994 | -0.96788764385860 |
| H | -0.42503757921083 | 7.61837396474308  | -0.04343726485716 |
| C | -0.54563649879525 | 6.53465477799329  | -0.07371955719236 |
| C | -1.79867026695060 | 5.95863756629247  | 0.15368253608070  |
| H | -2.66241310771590 | 6.59181413400062  | 0.36259695982066  |
| C | -1.96138574859704 | 4.57550282356760  | 0.11675221689110  |
| H | -2.92780240416454 | 4.10418066901640  | 0.29077892179560  |
| C | -0.85471618741227 | 3.76210069906547  | -0.15120129381880 |
| C | 0.40418775786927  | 4.32478057871832  | -0.38048942949354 |
| H | 1.25070739494070  | 3.67261292009265  | -0.58700649624141 |
| C | 0.55001498826839  | 5.71185348257578  | -0.33993446902975 |
| H | 1.53323737696770  | 6.14980407807538  | -0.51899091585353 |

**e**

|   |                   |                  |                   |
|---|-------------------|------------------|-------------------|
| C | -5.72390485691747 | 3.19497309347027 | -1.81574371401401 |
| N | -5.95172675366701 | 4.07157534772028 | -2.84523190889514 |
| C | -7.29589053585254 | 4.37981810961843 | -3.01388413393855 |
| C | -7.96452719597403 | 3.67611961395203 | -2.05800095390127 |
| N | -6.99545001988785 | 2.97331237860612 | -1.35287805461776 |
| C | -4.88245145130648 | 4.61659981282155 | -3.66073890128932 |
| H | -7.66236184711166 | 5.05622085991221 | -3.77871674406353 |
| H | -3.94591408883197 | 4.16972762954287 | -3.31155079175480 |
| H | -4.82632374481124 | 5.71007648700995 | -3.55502543309924 |
| H | -5.03376397555543 | 4.36770880695927 | -4.72127167463430 |
| C | -7.28002438021749 | 2.08806449316356 | -0.23898716961987 |
| H | -6.32333684212180 | 1.68711350240584 | 0.11131433194992  |
| H | -7.93040361052687 | 1.25862136465482 | -0.55344086230189 |
| H | -7.76937595072617 | 2.63453883576880 | 0.58056560686261  |
| H | -9.02428133629196 | 3.62209494689397 | -1.83262895148282 |

**g**

|   |                   |                   |                   |
|---|-------------------|-------------------|-------------------|
| C | -2.18011165317003 | 1.62719896086524  | -0.42851769024726 |
| N | -1.33666302570011 | 2.07570520570196  | 0.52986535260950  |
| N | -0.20776173526759 | 1.30732145310757  | 0.75997473554121  |
| C | -0.35639335548292 | 0.33099016851888  | -0.09776659377811 |
| N | -1.51589346823150 | 0.48545271253841  | -0.82265792675819 |
| H | 0.34488364673747  | -0.48956338374022 | -0.21854005171602 |
| C | -1.99555661223159 | -0.41568559200891 | -1.85647885205197 |
| H | -2.91795514225731 | 0.01309120230765  | -2.26051813647501 |
| H | -2.20895090608057 | -1.41032404658342 | -1.44027138963007 |
| H | -1.25482683529255 | -0.51318273965924 | -2.66234714071798 |
| C | -1.51955301553949 | 3.27736615687545  | 1.31821974456168  |
| H | -2.45614936301406 | 3.74175103395088  | 0.99527968192959  |
| H | -0.68129704714317 | 3.96809383394313  | 1.15587362577748  |
| H | -1.57272524772658 | 3.02534986098261  | 2.38582028525514  |

### **3a bis carbene**

|    |                   |                   |                   |
|----|-------------------|-------------------|-------------------|
| C  | -2.18987538247691 | 1.62506155120274  | -0.32736418001034 |
| N  | -1.03822445711579 | 2.30930093058582  | -0.05540091671794 |
| C  | -0.00794602889724 | 1.44338606765805  | 0.28212631138999  |
| C  | -0.52965547175398 | 0.18634350702815  | 0.23101751324585  |
| N  | -1.85770569112652 | 0.32100088420750  | -0.14016230085030 |
| H  | 0.97946190125143  | 1.79568168315469  | 0.55421076637740  |
| H  | -0.07525741705280 | -0.77638056253943 | 0.43357188788253  |
| C  | -2.77053124157630 | -0.79942708206363 | -0.33128279991161 |
| Ag | -3.97981056353038 | 2.44272861957070  | -0.97867326204857 |
| C  | -5.75765252795295 | 3.24807553171360  | -1.67637599930390 |
| N  | -6.02606928752741 | 4.51427590062125  | -2.08938294436973 |
| C  | -7.32434839072803 | 4.62759796974894  | -2.55974204724217 |
| C  | -7.89398493451127 | 3.39652237903644  | -2.43755690746433 |
| N  | -6.92439931915705 | 2.56864770978395  | -1.89007314689877 |
| C  | -5.06410235025547 | 5.60951365454475  | -2.07290873933122 |
| H  | -7.73196295995292 | 5.56172756403375  | -2.92796827212849 |
| H  | -8.89589104076323 | 3.04885410139119  | -2.65761142716812 |
| H  | -3.76030629027829 | -0.40277183238548 | -0.58386777226652 |

|   |                   |                   |                   |
|---|-------------------|-------------------|-------------------|
| H | -2.83940444992166 | -1.38866421629270 | 0.59222744799354  |
| H | -2.41656717260116 | -1.44126414205538 | -1.14839719841982 |
| H | -4.14621061869887 | 5.25945285533295  | -1.58744519051515 |
| H | -5.47303861415348 | 6.45803085084966  | -1.50955345550418 |
| H | -4.83443618100876 | 5.92846885152032  | -3.09790401165762 |
| H | -0.59579428315093 | 7.58704440936269  | -0.34402539831783 |
| C | -0.68840276678055 | 6.50217382978002  | -0.28522645201462 |
| C | -1.72439976299633 | 5.92753521683459  | 0.45513506699392  |
| H | -2.43496055028649 | 6.56126933900472  | 0.98733446409500  |
| C | -1.83913565726312 | 4.53953063455700  | 0.54398907386720  |
| H | -2.62029279709284 | 4.07744019892212  | 1.14840522181151  |
| C | -0.91465228650185 | 3.73359854304164  | -0.12612141606448 |
| C | 0.12680525916450  | 4.29725263723611  | -0.86542034507716 |
| H | 0.83003267554450  | 3.65310836274963  | -1.39506503015531 |
| C | 0.23794626629538  | 5.68634173436143  | -0.93877774262951 |
| H | 1.04814718834188  | 6.13103307190082  | -1.51724900627111 |
| C | -7.11060493320181 | 1.17992353859748  | -1.59714717661648 |
| C | -7.62363609943000 | 0.33285361068954  | -2.58113578743763 |
| H | -7.86527055509251 | 0.72809849365098  | -3.56874071028663 |
| C | -7.79568726543714 | -1.02182748654017 | -2.29377747173897 |
| H | -8.19354809824486 | -1.68765314270844 | -3.06005691755280 |
| C | -7.45044834276744 | -1.52426173060403 | -1.03710009310195 |
| H | -7.58894403249130 | -2.58319884210621 | -0.81698201198547 |
| C | -6.94142308355921 | -0.66699499549254 | -0.05853863021895 |
| H | -6.69388998952947 | -1.05100191545184 | 0.93192577280040  |
| C | -6.77492268740208 | 0.69146368996008  | -0.33145544691053 |
| H | -6.41336083472905 | 1.37855386100639  | 0.43414505263102  |

### **3a mono carbene**

|    |                   |                  |                   |
|----|-------------------|------------------|-------------------|
| Ag | -4.04188195824773 | 2.35344892345727 | -1.00514313386690 |
| C  | -5.76541805603049 | 3.24857755501466 | -1.70757956920495 |
| N  | -6.01773065124926 | 4.52014586031543 | -2.09762956964591 |
| C  | -7.32749486728363 | 4.64154175348155 | -2.53184019899928 |
| C  | -7.90403085990135 | 3.41264633837297 | -2.40425979838213 |

|   |                   |                   |                   |
|---|-------------------|-------------------|-------------------|
| N | -6.93117984849109 | 2.56994547242965  | -1.88976147010145 |
| C | -5.05143068127722 | 5.61389351223837  | -2.09613124622370 |
| H | -7.73569626603858 | 5.58221155880863  | -2.88295898824783 |
| H | -8.91321802455797 | 3.07250025043492  | -2.60282854542229 |
| H | -4.11582468162074 | 5.25261810762219  | -1.65661950838908 |
| H | -5.43499268922069 | 6.44856987792064  | -1.49663978590466 |
| H | -4.86484359218026 | 5.95230938852100  | -3.12299914673931 |
| C | -7.11436515273433 | 1.17729666552403  | -1.59636088317303 |
| C | -7.59460566119850 | 0.32636212491105  | -2.59248689738179 |
| H | -7.81759632126673 | 0.71696123723730  | -3.58630380664086 |
| C | -7.75749482107664 | -1.02906935603862 | -2.30382949721600 |
| H | -8.12857242780855 | -1.70208489491675 | -3.07705334508805 |
| C | -7.43484912562378 | -1.52403852096487 | -1.03784835869267 |
| H | -7.56279485202821 | -2.58451429345412 | -0.81978709366191 |
| C | -6.95977636602056 | -0.66138421525251 | -0.04776823232885 |
| H | -6.73153170124683 | -1.04173764090439 | 0.94824863188691  |
| C | -6.80401879609106 | 0.69927225714609  | -0.31939290548350 |
| H | -6.49429530900575 | 1.39437910709552  | 0.46291452490723  |

### **3c bis carbene**

|    |                   |                   |                   |
|----|-------------------|-------------------|-------------------|
| C  | -2.16575903499210 | 1.67629356492085  | -0.33686302544887 |
| N  | -1.02743252511724 | 2.35964621861372  | -0.07395937513680 |
| N  | 0.04806655074137  | 1.55651909458536  | 0.21313358113135  |
| C  | -0.44719105861714 | 0.34760828389475  | 0.14019003790817  |
| N  | -1.78283981828372 | 0.37561271643004  | -0.18339483675228 |
| H  | 0.11959355005213  | -0.56126023595266 | 0.31686917229653  |
| C  | -2.63983135259874 | -0.79245660309350 | -0.36598579594525 |
| Ag | -3.98721723101717 | 2.44859530975210  | -0.95814069317462 |
| C  | -5.77714662963697 | 3.19998103377286  | -1.68611638004967 |
| N  | -6.06638878027152 | 4.44814446184407  | -2.15562498997243 |
| C  | -7.35390413089086 | 4.44731498373075  | -2.63701939149653 |
| N  | -7.91204854747964 | 3.27239874566759  | -2.49512113469275 |
| N  | -6.92906031983611 | 2.52215743074369  | -1.89932616319343 |
| C  | -5.15029190333890 | 5.58504640003874  | -2.17471832265552 |

|   |                   |                   |                   |
|---|-------------------|-------------------|-------------------|
| H | -7.84341047553028 | 5.31234302257906  | -3.07360978948862 |
| H | -3.66205679126932 | -0.44638575988254 | -0.55370349236774 |
| H | -2.62503410696375 | -1.41092034400565 | 0.53988709644668  |
| H | -2.29391953870861 | -1.38489530358874 | -1.22227442482632 |
| H | -4.22375862681271 | 5.29198325181699  | -1.66912540755276 |
| H | -5.59987903169894 | 6.43536021225764  | -1.64728945149006 |
| H | -4.92453900741135 | 5.87100910377814  | -3.20966348294214 |
| H | -0.43017435318275 | 7.62153737800584  | -0.19800968814910 |
| C | -0.55505822358618 | 6.53868868539273  | -0.17073358572020 |
| C | -1.69729068601194 | 5.98152437879653  | 0.40887961769697  |
| H | -2.45727927671020 | 6.62571853114060  | 0.85281746577573  |
| C | -1.85424457179852 | 4.59592927631658  | 0.45923248658403  |
| H | -2.71589507585036 | 4.14738650205078  | 0.95525801592840  |
| C | -0.86290241584652 | 3.77996725938199  | -0.09214329859530 |
| C | 0.29080234503060  | 4.32184171730281  | -0.65959601524444 |
| H | 1.05671996077402  | 3.66023079861824  | -1.06288184579164 |
| C | 0.43875311151929  | 5.70795336557893  | -0.69459816185847 |
| H | 1.33673490023840  | 6.14008905321723  | -1.13675339630455 |
| C | -7.17946055688306 | 1.14887445639511  | -1.58894214678063 |
| C | -7.87773340180903 | 0.36323388266527  | -2.50651966950673 |
| H | -8.23791084360330 | 0.80708819198911  | -3.43401881136503 |
| C | -8.10234703786995 | -0.98091983899975 | -2.21120865023486 |
| H | -8.64637098838648 | -1.60240602082551 | -2.92283309170823 |
| C | -7.63285588861387 | -1.53013159898749 | -1.01534076785615 |
| H | -7.81616801076715 | -2.58098297675702 | -0.78948279307904 |
| C | -6.94955962795305 | -0.72744799105820 | -0.09888032622064 |
| H | -6.61520614336795 | -1.14343178958814 | 0.85235041926515  |
| C | -6.72562338200025 | 0.62146943979285  | -0.37712474555511 |
| H | -6.23996824393995 | 1.27054255976810  | 0.35258835362296  |

### **3c mono carbene**

|    |                   |                  |                   |
|----|-------------------|------------------|-------------------|
| Ag | -4.05260814015702 | 2.33343213430612 | -0.98862572733022 |
| C  | -5.78455946868523 | 3.19795588774867 | -1.71949826105707 |
| N  | -6.05946421373975 | 4.45539403738066 | -2.15980186397438 |

|   |                   |                   |                   |
|---|-------------------|-------------------|-------------------|
| C | -7.36208944684430 | 4.46968684749240  | -2.59917291503738 |
| N | -7.92823514711302 | 3.29759669659261  | -2.45100852889566 |
| N | -6.94166127498276 | 2.52698379768032  | -1.89581575595909 |
| C | -5.13596311655919 | 5.58789465983815  | -2.19645914501964 |
| H | -7.85532064261571 | 5.34456858173216  | -3.01190986422696 |
| H | -4.19486612008091 | 5.28560432857240  | -1.72651959335427 |
| H | -5.56276430097515 | 6.43211219271157  | -1.64192475512549 |
| H | -4.94636832986400 | 5.88357702351599  | -3.23554319933822 |
| C | -7.18854828538838 | 1.15084089712755  | -1.58561668008227 |
| C | -7.85826641805420 | 0.35797124816579  | -2.51693601217680 |
| H | -8.20410203892687 | 0.79376665517100  | -3.45383156526008 |
| C | -8.06878060487504 | -0.98862112095826 | -2.22197835361263 |
| H | -8.58881270038534 | -1.61991956243582 | -2.94267893300312 |
| C | -7.61237286609555 | -1.52902877353893 | -1.01671335604445 |
| H | -7.78091489406620 | -2.58299306017872 | -0.79477636446762 |
| C | -6.95948257323932 | -0.71780913809018 | -0.08627432584378 |
| H | -6.63618561369220 | -1.12926529274668 | 0.87016357565984  |
| C | -6.75182258158698 | 0.63473971117111  | -0.36156762713432 |
| H | -6.31766003117282 | 1.29573451914207  | 0.39132181498362  |

### **3e bis carbene**

|    |                   |                   |                   |
|----|-------------------|-------------------|-------------------|
| C  | -2.14060598705824 | 1.62315679959411  | -0.46746850705626 |
| N  | -1.32689548351427 | 2.11623192774529  | 0.50707058872441  |
| C  | -0.21163133876129 | 1.31662817570336  | 0.68036169339168  |
| C  | -0.32618677782563 | 0.29139798136729  | -0.20987265424153 |
| N  | -1.50776967216556 | 0.49701575548648  | -0.89895585773141 |
| H  | 0.32462571097489  | -0.55264771650324 | -0.40601195377982 |
| C  | -2.00337433083876 | -0.38676384078126 | -1.94661860400772 |
| Ag | -3.94072848961592 | 2.41319171965136  | -1.14357635415576 |
| C  | -5.74019206355699 | 3.20257344971627  | -1.82151995058427 |
| N  | -5.93517520987610 | 4.07263321597680  | -2.85100182229942 |
| C  | -7.27694112079803 | 4.36948244626295  | -3.00845295287461 |
| C  | -7.94565978517579 | 3.66626197172324  | -2.05186761846363 |
| N  | -6.99128379166009 | 2.96237132947015  | -1.33987703317476 |

|   |                   |                   |                   |
|---|-------------------|-------------------|-------------------|
| C | -4.87473063738293 | 4.63223943521836  | -3.67961971789077 |
| H | -7.63939823861834 | 5.04464089337707  | -3.77475391094946 |
| H | -2.94397100638179 | 0.02447027940968  | -2.32926193976849 |
| H | -2.18441224936383 | -1.39066666585166 | -1.54143108313417 |
| H | -1.27460296077939 | -0.44863593849582 | -2.76489767598836 |
| H | -3.92191154083444 | 4.19367218503037  | -3.36346672634884 |
| H | -4.83148043010267 | 5.72210765052075  | -3.55614964788449 |
| H | -5.05336636972868 | 4.39060043075050  | -4.73509995196172 |
| C | -1.58734927793141 | 3.32876904495794  | 1.27261927782586  |
| C | -7.29692535349223 | 2.07839748103726  | -0.22209310532088 |
| H | -2.53692300476491 | 3.75416748615263  | 0.93003425810131  |
| H | -0.78333796197002 | 4.05844623096174  | 1.11202559756757  |
| H | -1.65948658579431 | 3.09318232773126  | 2.34215528475504  |
| H | -6.35661414135676 | 1.66171799875032  | 0.15521114946639  |
| H | -7.94966113997998 | 1.26047036335845  | -0.55318986240298 |
| H | -7.79275409771628 | 2.64023414782705  | 0.57983944657511  |
| H | 0.55855023178697  | 1.53897169472026  | 1.40961404675195  |
| H | -9.00364266941713 | 3.60916228343097  | -1.82417765073992 |

### **3e mono carbene**

|    |                   |                  |                   |
|----|-------------------|------------------|-------------------|
| Ag | -3.96008622643690 | 2.42502435792149 | -1.14841324385542 |
| C  | -5.74851677142449 | 3.20535838265984 | -1.82533604081455 |
| N  | -5.92611028630003 | 4.07328078836841 | -2.85268200410721 |
| C  | -7.26923164084685 | 4.36781116896428 | -3.00463871666057 |
| C  | -7.93820366272607 | 3.66408687119837 | -2.04788574016888 |
| N  | -6.98807719422861 | 2.95638110124769 | -1.33359016815455 |
| C  | -4.86961032418851 | 4.63674667277526 | -3.68753197335501 |
| H  | -7.63132049803351 | 5.04413819824332 | -3.77029686539405 |
| H  | -3.91019243450776 | 4.20744233527822 | -3.37873888019020 |
| H  | -4.83487777540200 | 5.72636496300118 | -3.56446923090452 |
| H  | -5.05345155847710 | 4.38865415224365 | -4.74003595911438 |
| C  | -7.30201994297555 | 2.07186467565561 | -0.21568498572173 |
| H  | -6.36855405190411 | 1.64865590709916 | 0.17119377003972  |
| H  | -7.95501680049789 | 1.25781661302409 | -0.55385705897072 |

|   |                   |                  |                   |
|---|-------------------|------------------|-------------------|
| H | -7.79904009283620 | 2.63847846488745 | 0.58133458569369  |
| H | -8.99615581861439 | 3.60765234963194 | -1.81916319732160 |

### 3g bis carbene

|    |                   |                   |                   |
|----|-------------------|-------------------|-------------------|
| C  | -2.16362802303153 | 1.62015756747009  | -0.42315001488924 |
| N  | -1.34230204362095 | 2.09172502665786  | 0.53638085273483  |
| N  | -0.23383693101746 | 1.32095246618844  | 0.74866493099318  |
| C  | -0.37355792625362 | 0.33965445324286  | -0.10676819932211 |
| N  | -1.52804708480988 | 0.48195557112958  | -0.83644681800387 |
| H  | 0.32834386266434  | -0.47975598007952 | -0.22667133849456 |
| C  | -1.99600819294944 | -0.43567311452380 | -1.87100468492287 |
| Ag | -3.95478899010708 | 2.42799063710861  | -1.10212050687113 |
| C  | -5.74809946676932 | 3.23296904382676  | -1.77822847614436 |
| N  | -5.95624407675515 | 4.11596117458610  | -2.80156453591842 |
| C  | -7.30318159861690 | 4.36702860945941  | -2.89166698855631 |
| N  | -7.96847590091448 | 3.69481931716915  | -1.98621868584843 |
| N  | -6.99467282463184 | 3.00853044225601  | -1.31642374463336 |
| C  | -4.92386227940709 | 4.71043004598485  | -3.64538005382486 |
| H  | -7.75317668988958 | 5.03450470666408  | -3.61999531871337 |
| H  | -2.91728306109053 | -0.02943077307049 | -2.30128706955292 |
| H  | -2.20244550216340 | -1.42161480612224 | -1.43630451953259 |
| H  | -1.23865846786680 | -0.53124267736214 | -2.65868569212076 |
| H  | -3.97051746316495 | 4.22083028043858  | -3.42111500320207 |
| H  | -4.83770750825313 | 5.78483290516737  | -3.43975704648440 |
| H  | -5.17117577029463 | 4.55622186707467  | -4.70261775394903 |
| C  | -1.51513627206743 | 3.29461371358014  | 1.33605946168514  |
| C  | -7.38883589639582 | 2.13803708453889  | -0.21936533590804 |
| H  | -2.44939197818568 | 3.77791292236757  | 1.03224779327537  |
| H  | -0.66834455420113 | 3.97041322367486  | 1.16721244597761  |
| H  | -1.55865758579985 | 3.02389723357900  | 2.39768849643045  |
| H  | -6.48640024013856 | 1.67854694555156  | 0.19688924094969  |
| H  | -8.06854281119332 | 1.36340570554257  | -0.59384797662347 |
| H  | -7.89961389247466 | 2.72946240739915  | 0.54974397886995  |



**3g mono carbene**

|    |                   |                  |                   |
|----|-------------------|------------------|-------------------|
| Ag | -3.94684297611960 | 2.69108182679747 | -0.92867724068053 |
| C  | -5.75281416387603 | 3.29673917514705 | -1.73129235450767 |
| N  | -5.95070330099001 | 4.10056296530781 | -2.81478064125280 |
| C  | -7.30471579454447 | 4.23756520660535 | -2.98976604036455 |
| N  | -7.96903859773567 | 3.56729286885557 | -2.08028014414524 |
| N  | -6.99452624642004 | 2.99544463048991 | -1.31550892677178 |
| C  | -4.90902249927996 | 4.71021245980303 | -3.64060267799998 |
| H  | -7.75981373393742 | 4.82603675182326 | -3.78058833742823 |
| H  | -4.27600805916464 | 3.93079772521044 | -4.08091715071426 |
| H  | -4.30108914734851 | 5.39321917736354 | -3.03541926471653 |
| H  | -5.38914553342758 | 5.27675364608809 | -4.44531145190051 |
| C  | -7.39391333683891 | 2.16241491317103 | -0.18900510850219 |
| H  | -6.49284440442747 | 1.79050302957628 | 0.30916703975270  |
| H  | -7.99482686118282 | 1.32279689612653 | -0.55726166221963 |
| H  | -7.98999075380677 | 2.76214990053460 | 0.50857575475124  |

**4a bis carbene**

|    |                   |                   |                   |
|----|-------------------|-------------------|-------------------|
| C  | -2.16869446884915 | 1.66838851408239  | -0.44934814082881 |
| N  | -1.03831785838481 | 2.36005901945012  | -0.10817268207297 |
| C  | -0.00201334158199 | 1.49014384465155  | 0.19731881434668  |
| C  | -0.49555309570619 | 0.22964049017028  | 0.05398095076488  |
| N  | -1.81622135390914 | 0.35857513518915  | -0.33815438975994 |
| H  | 0.97192123802488  | 1.84261205692767  | 0.51451440085728  |
| H  | -0.02520036690092 | -0.73495069763314 | 0.20553450685117  |
| C  | -2.69641456617857 | -0.77076260808856 | -0.61918186212845 |
| Au | -3.94836124524844 | 2.42622184296723  | -1.08308535305754 |
| C  | -5.71326642663719 | 3.16943472890688  | -1.77335331170959 |
| N  | -5.95734235768018 | 4.41731889263389  | -2.25857685355252 |
| C  | -7.26164124051659 | 4.53152296326942  | -2.70621444976995 |
| C  | -7.85786142630127 | 3.32615595356169  | -2.49503969996211 |
| N  | -6.90049869631347 | 2.50459408212679  | -1.91848446710198 |
| C  | -4.97398802806600 | 5.49286570890859  | -2.33202920052780 |
| H  | -7.65509759826800 | 5.45117973158787  | -3.12341013391111 |

|   |                   |                   |                   |
|---|-------------------|-------------------|-------------------|
| H | -8.87300231807818 | 2.99214954021047  | -2.67201043379365 |
| H | -3.69290622182979 | -0.38384033754411 | -0.85876145575477 |
| H | -2.75977721936688 | -1.42278379377903 | 0.26159788801505  |
| H | -2.31291130272142 | -1.34532845642069 | -1.47248249256443 |
| H | -4.05231866813585 | 5.15567520616160  | -1.84535928004950 |
| H | -5.35584662617341 | 6.38252679431921  | -1.81489029379571 |
| H | -4.76327278679620 | 5.74174186531141  | -3.38041271317335 |
| H | -0.53978533251397 | 7.64247015197028  | 0.06854918189031  |
| C | -0.64956450315451 | 6.55816838928206  | 0.02591509482875  |
| C | -1.67486166878332 | 5.93051126320619  | 0.73800963710164  |
| H | -2.36076829582034 | 6.52137862372786  | 1.34664436120542  |
| C | -1.81219942046726 | 4.54179777270332  | 0.69864327820076  |
| H | -2.58832334832043 | 4.03851446915826  | 1.27594053941005  |
| C | -0.91946199336014 | 3.78989167461972  | -0.07008522924294 |
| C | 0.10984348622772  | 4.40703883526427  | -0.78546475969374 |
| H | 0.79004037718723  | 3.80627034872562  | -1.39131008543515 |
| C | 0.24245211566459  | 5.79542989097210  | -0.73162339063447 |
| H | 1.04379676574572  | 6.28124097415421  | -1.28950560587437 |
| C | -7.14175909057432 | 1.14271082465580  | -1.53496706229422 |
| C | -7.66300468294197 | 0.25181998963887  | -2.47664102053718 |
| H | -7.84937157565464 | 0.58520682839429  | -3.49878122024471 |
| C | -7.92075778563032 | -1.06724303050426 | -2.10002683436513 |
| H | -8.32653109772219 | -1.76617507199637 | -2.83231203813677 |
| C | -7.65406118891160 | -1.49100834972840 | -0.79594658596598 |
| H | -7.86084049613946 | -2.52154141051523 | -0.50470825466584 |
| C | -7.13356536139970 | -0.59137380450069 | 0.13786689039770  |
| H | -6.94319459119721 | -0.91393184354425 | 1.16244314761621  |
| C | -6.87973107838422 | 0.73261138138816  | -0.22485240240305 |
| H | -6.50412638493083 | 1.45151745115748  | 0.50383138242180  |

#### **4a mono carbene**

|    |                   |                  |                   |
|----|-------------------|------------------|-------------------|
| Au | -4.03948931035729 | 2.38672220151081 | -1.18836156773296 |
| C  | -5.72903742051179 | 3.16594688504320 | -1.81733563645506 |
| N  | -5.94294818271672 | 4.42407383256629 | -2.26830145705496 |

|   |                   |                   |                   |
|---|-------------------|-------------------|-------------------|
| C | -7.26578628379151 | 4.55467773876297  | -2.65495179075441 |
| C | -7.87234569440743 | 3.35457945669849  | -2.43224043167765 |
| N | -6.91163078702725 | 2.50323479807735  | -1.90881477426555 |
| C | -4.94704131506743 | 5.49057539859016  | -2.36792362076721 |
| H | -7.66038010927633 | 5.48629623687260  | -3.04425055835865 |
| H | -8.89850783125500 | 3.03594959335255  | -2.57210206764206 |
| H | -4.00671002184909 | 5.13432725417458  | -1.93473447772897 |
| H | -5.29486900361089 | 6.37010929282391  | -1.81256232222303 |
| H | -4.78893456532394 | 5.75421853500807  | -3.42112654064259 |
| C | -7.14988838213436 | 1.13368645271072  | -1.52634182156948 |
| C | -7.61035038462318 | 0.23507168785827  | -2.49061875522495 |
| H | -7.75760713827384 | 0.56062669084888  | -3.52156348308261 |
| C | -7.85679364983078 | -1.08678023539127 | -2.11668252801205 |
| H | -8.21241137501566 | -1.79863833086706 | -2.86216212007044 |
| C | -7.63992561898163 | -1.49716201484417 | -0.79889758293714 |
| H | -7.83415879218332 | -2.53140379165264 | -0.51289536043413 |
| C | -7.18232729780848 | -0.58524070915398 | 0.15518486762693  |
| H | -7.02904998657361 | -0.90125254894922 | 1.18754432999985  |
| C | -6.93906770605039 | 0.74234225626598  | -0.20170118123442 |
| H | -6.62017989493001 | 1.47201959429349  | 0.54387869154157  |

#### **4c bis carbene**

|    |                   |                   |                   |
|----|-------------------|-------------------|-------------------|
| C  | -2.12557909886241 | 1.71470893330740  | -0.51454273888775 |
| N  | -1.02099917134451 | 2.40811149358089  | -0.14326299554201 |
| N  | 0.06474944510186  | 1.60874186809475  | 0.10713205382170  |
| C  | -0.38666750856765 | 0.39899419998490  | -0.10043798714211 |
| N  | -1.70791772841400 | 0.41408994127304  | -0.47074747468043 |
| H  | 0.20454812876500  | -0.50489352285623 | 0.01113501122120  |
| C  | -2.51247935256699 | -0.76205238578082 | -0.79577960573321 |
| Au | -3.93398526244202 | 2.41674267751934  | -1.12574308404045 |
| C  | -5.71206284585890 | 3.10345367593506  | -1.83603775809465 |
| N  | -5.96700939683509 | 4.31866931250136  | -2.40728722622643 |
| C  | -7.26897776628372 | 4.32546525334777  | -2.84068556982247 |
| N  | -7.86740276383920 | 3.19409238781020  | -2.57198797690429 |

|   |                   |                   |                   |
|---|-------------------|-------------------|-------------------|
| N | -6.89777377291829 | 2.45456749373907  | -1.94469069823918 |
| C | -5.01366289870189 | 5.41529018601515  | -2.56461468966896 |
| H | -7.74125440570085 | 5.16730836738209  | -3.33792517006222 |
| H | -3.54655366739517 | -0.44077603712606 | -0.95874490989230 |
| H | -2.47868800226707 | -1.47556628977077 | 0.03676985758248  |
| H | -2.13084367142069 | -1.23998129304674 | -1.70697320170704 |
| H | -4.08835918200450 | 5.14771602555683  | -2.04371135657792 |
| H | -5.42743216805479 | 6.33191143562137  | -2.12641258420728 |
| H | -4.79939741931917 | 5.57900787838695  | -3.62838045012894 |
| H | -0.46430829958330 | 7.65588304559356  | 0.36682627870325  |
| C | -0.58491580704363 | 6.57736856374468  | 0.25837072680992  |
| C | -1.73313057492615 | 5.95013340761959  | 0.74777888403242  |
| H | -2.50367087438906 | 6.53351170316285  | 1.25354362844856  |
| C | -1.88688108755097 | 4.56811994285884  | 0.62512347115096  |
| H | -2.75788300572254 | 4.06390054540276  | 1.04505587636458  |
| C | -0.88325067570566 | 3.82808495719981  | -0.00563769617270 |
| C | 0.27608515333591  | 4.43967955677338  | -0.48768916168829 |
| H | 1.05298776141220  | 3.83570091458926  | -0.95582137532104 |
| C | 0.41868165056091  | 5.82014578253704  | -0.35176769968843 |
| H | 1.32097003228042  | 6.30527892911440  | -0.72555309304896 |
| C | -7.21619622064520 | 1.13044370552214  | -1.49800678231555 |
| C | -7.97719417133158 | 0.30638491422726  | -2.33004691051566 |
| H | -8.31589054308808 | 0.67703549747856  | -3.29721172940973 |
| C | -8.29619825961513 | -0.98061442057413 | -1.89834997561099 |
| H | -8.89007597237290 | -1.63026152380408 | -2.54212975425908 |
| C | -7.85979453974786 | -1.43583794353755 | -0.65128061658265 |
| H | -8.11791099223659 | -2.44142709718664 | -0.31710983002831 |
| C | -7.11048368787967 | -0.59575831831786 | 0.17585424565633  |
| H | -6.79597110848118 | -0.93641181604970 | 1.16322853860606  |
| C | -6.78930148720039 | 0.69757838550062  | -0.23974373426969 |
| H | -6.24500600153944 | 1.37631051466957  | 0.41769835947131  |

#### 4c mono carbene

|    |                   |                  |                   |
|----|-------------------|------------------|-------------------|
| Au | -4.02470806697366 | 2.36949158697243 | -1.22332622079983 |
|----|-------------------|------------------|-------------------|

|   |                   |                   |                   |
|---|-------------------|-------------------|-------------------|
| C | -5.72696686786483 | 3.09748699095767  | -1.87628088259307 |
| N | -5.95488124483850 | 4.32831479169069  | -2.41091550380985 |
| C | -7.27474384635843 | 4.35741688498781  | -2.78532788481522 |
| N | -7.88152291104036 | 3.23032694820559  | -2.50543498000803 |
| N | -6.91170465315767 | 2.45532135190654  | -1.93114246908939 |
| C | -4.98786177740648 | 5.41368507145865  | -2.59148076671647 |
| H | -7.75320634593713 | 5.21415737079521  | -3.25091961044059 |
| H | -4.04724119608611 | 5.12851743310316  | -2.11011600051627 |
| H | -5.37414274935116 | 6.32739600014948  | -2.12447020016968 |
| H | -4.81613256621513 | 5.58354701142362  | -3.66147399789553 |
| C | -7.22632418766976 | 1.12567359489437  | -1.48600118634159 |
| C | -7.94634222223853 | 0.29116207602923  | -2.34248485493364 |
| H | -8.25790374595016 | 0.65011661199335  | -3.32329026818638 |
| C | -8.25332999513252 | -0.99992896917809 | -1.91477301915182 |
| H | -8.81207172749493 | -1.66438937447245 | -2.57436267542599 |
| C | -7.84562092035343 | -1.44126813772142 | -0.65281765153841 |
| H | -8.09088765243925 | -2.45197813715921 | -0.32500350531545 |
| C | -7.13943894779469 | -0.58685927830654 | 0.19706548242950  |
| H | -6.84659345890863 | -0.92101822807215 | 1.19279442989797  |
| C | -6.82971210082562 | 0.71103400337660  | -0.21187241278240 |
| H | -6.33000368186295 | 1.40346098866545  | 0.46705942510218  |

#### **4e bis carbene**

|    |                   |                   |                   |
|----|-------------------|-------------------|-------------------|
| C  | -2.17254724968744 | 1.63769839575080  | -0.47954709634677 |
| N  | -1.35897396455175 | 2.13621347193193  | 0.49349436326100  |
| C  | -0.24699023738864 | 1.33323147158069  | 0.66543838013785  |
| C  | -0.36455169627246 | 0.30527483979595  | -0.22093101686021 |
| N  | -1.54515427544183 | 0.50751453655149  | -0.91096979574990 |
| H  | 0.28519855733194  | -0.54042140243194 | -0.41413694495413 |
| C  | -2.04082667840087 | -0.38163805460273 | -1.95625540726055 |
| Au | -3.94037913058680 | 2.41362967950346  | -1.14388940698118 |
| C  | -5.70811874744542 | 3.18818420428122  | -1.80979915896535 |
| N  | -5.89867763087705 | 4.06270290229434  | -2.83742190649781 |
| C  | -7.24058063633352 | 4.35617353686126  | -2.99241749475783 |

|   |                   |                   |                   |
|---|-------------------|-------------------|-------------------|
| C | -7.90958451752369 | 3.64869039000806  | -2.03947908877031 |
| N | -6.95862595306772 | 2.94202360419896  | -1.32733544930718 |
| C | -4.83930354250113 | 4.62831270866251  | -3.66609138814327 |
| H | -7.60392437050704 | 5.03382664231553  | -3.75626625572976 |
| H | -2.98228529269893 | 0.02595476850647  | -2.33990024033478 |
| H | -2.21820535898149 | -1.38429180762562 | -1.54610523893672 |
| H | -1.31108913589741 | -0.44498645195388 | -2.77371921946263 |
| H | -3.88414350143624 | 4.19640319211939  | -3.34872107319194 |
| H | -4.80475317454475 | 5.71867471420975  | -3.54337715044392 |
| H | -5.01707959506614 | 4.38471674208374  | -4.72139997586672 |
| C | -1.61316404153251 | 3.35273695010728  | 1.25786986640886  |
| C | -7.26857849828886 | 2.05320725942261  | -0.21253538408116 |
| H | -2.56118506345308 | 3.78241298167283  | 0.91701982093416  |
| H | -0.80480862325533 | 4.07706856090801  | 1.09412604320071  |
| H | -1.68279077744844 | 3.11811325854391  | 2.32790091401714  |
| H | -6.33035670304745 | 1.63424552927177  | 0.16667312366030  |
| H | -7.92166280061288 | 1.23803578665572  | -0.55005806617929 |
| H | -7.76768999129937 | 2.61361492029235  | 0.58851127806422  |
| H | 0.52509088927223  | 1.55568129731532  | 1.39283050021382  |
| H | -8.96809403235589 | 3.59047591616881  | -1.81394076857661 |

#### **4e mono carbene**

|    |                   |                  |                   |
|----|-------------------|------------------|-------------------|
| Au | -4.02052495568785 | 2.45240796994239 | -1.17162313916339 |
| C  | -5.72239150879603 | 3.19419094361022 | -1.81539914277107 |
| N  | -5.88405955377089 | 4.06451609003632 | -2.84135502071774 |
| C  | -7.22865496216440 | 4.35186866455001 | -2.98778997537957 |
| C  | -7.89804246237042 | 3.64376491099125 | -2.03444352783662 |
| N  | -6.95467614734198 | 2.93213202454159 | -1.31639005079722 |
| C  | -4.82521789418417 | 4.63347764200958 | -3.67534687478140 |
| H  | -7.59196403927740 | 5.03007446970445 | -3.75152824539916 |
| H  | -3.86493028364124 | 4.20812404788338 | -3.36581137271450 |
| H  | -4.79972979359695 | 5.72293361105689 | -3.54910468210370 |
| H  | -5.01174490123727 | 4.38491103150191 | -4.72722191002019 |
| C  | -7.27031813605027 | 2.04146468695044 | -0.19948637296899 |

|   |                   |                  |                   |
|---|-------------------|------------------|-------------------|
| H | -6.33850080098273 | 1.61534394246712 | 0.18653828710793  |
| H | -7.92538965870584 | 1.23258240873800 | -0.54577250914299 |
| H | -7.76866421554787 | 2.60939269953063 | 0.59571021374663  |
| H | -8.95674351204465 | 3.58573258498579 | -1.80852384285802 |

#### **4g bis carbene**

|    |                   |                   |                   |
|----|-------------------|-------------------|-------------------|
| C  | -2.19810331477489 | 1.63783099953692  | -0.43690862000879 |
| N  | -1.37208370699711 | 2.11947210735800  | 0.51560501021719  |
| N  | -0.26821097322776 | 1.34528297816439  | 0.72667831726827  |
| C  | -0.41565673221957 | 0.35655570655169  | -0.11855967730906 |
| N  | -1.57138009642138 | 0.49211136472942  | -0.84545593281458 |
| H  | 0.28381389220125  | -0.46597722244471 | -0.23304992766628 |
| C  | -2.04475277839975 | -0.43671924514128 | -1.86976661598786 |
| Au | -3.95486352869948 | 2.42593722480267  | -1.10438519530728 |
| C  | -5.71388836180707 | 3.21416235669855  | -1.76540410007376 |
| N  | -5.91573947986400 | 4.10757565718180  | -2.78194462314098 |
| C  | -7.26258739082239 | 4.35300016349941  | -2.87205481466100 |
| N  | -7.93009701350379 | 3.67002362221805  | -1.97661283933715 |
| N  | -6.96169316930216 | 2.97889894744994  | -1.30804810340306 |
| C  | -4.88309734449336 | 4.71552857128142  | -3.61857979929667 |
| H  | -7.71259994099940 | 5.02645275426482  | -3.59516175687452 |
| H  | -2.96740002979250 | -0.03480686775377 | -2.30062318132151 |
| H  | -2.24870325493000 | -1.41784109200960 | -1.42285013631837 |
| H  | -1.28918564062082 | -0.54062890706446 | -2.65827934498028 |
| H  | -3.92724203099581 | 4.23092416274218  | -3.39517220727797 |
| H  | -4.80611008491784 | 5.78902267972251  | -3.40410739513406 |
| H  | -5.12798571898608 | 4.56791684539098  | -4.67745600362876 |
| C  | -1.53449360210421 | 3.33117882477533  | 1.30692095832689  |
| C  | -7.36118363943240 | 2.09622884009956  | -0.22070475598171 |
| H  | -2.46688380723539 | 3.81862825997064  | 1.00455247888748  |
| H  | -0.68297753578844 | 3.99875626698682  | 1.12841271328562  |
| H  | -1.57314165167847 | 3.06777325232269  | 2.37073885458640  |
| H  | -6.46121131645434 | 1.63389896063403  | 0.19724656580317  |
| H  | -8.03806180007580 | 1.32531418496455  | -0.60821687787431 |

|   |                   |                  |                  |
|---|-------------------|------------------|------------------|
| H | -7.87872911715695 | 2.68063460276740 | 0.54945444762298 |
|---|-------------------|------------------|------------------|

#### 4g mono carbene

|    |                   |                  |                   |
|----|-------------------|------------------|-------------------|
| Au | -4.02532416639317 | 2.47542165963934 | -1.13048059402948 |
| C  | -5.72630520057466 | 3.22077911352721 | -1.76770292967781 |
| N  | -5.90166581451585 | 4.10912928630027 | -2.78533495636817 |
| C  | -7.25030668685407 | 4.34719075424366 | -2.87012744410622 |
| N  | -7.91584284697455 | 3.66224651895528 | -1.97241724016521 |
| N  | -6.95915120998420 | 2.96880182401937 | -1.29552080600619 |
| C  | -4.86851594156023 | 4.71972920142864 | -3.62659185346404 |
| H  | -7.70321524032045 | 5.01876244653397 | -3.59370628177003 |
| H  | -3.91192795292623 | 4.22898227536853 | -3.42177337962317 |
| H  | -4.78883229497754 | 5.78963037852351 | -3.39816708876433 |
| H  | -5.13033448726731 | 4.57997319561944 | -4.68191405962019 |
| C  | -7.36324435149810 | 2.08421398894268 | -0.20711258101259 |
| H  | -6.46895025447094 | 1.61580503166204 | 0.21550779149792  |
| H  | -8.04132427646345 | 1.31947541981682 | -0.60364282464348 |
| H  | -7.88014921281922 | 2.67537847911923 | 0.55783678915299  |

#### Structures for 3e mechanism

##### AgI<sub>2</sub>

|    |                  |                   |                   |
|----|------------------|-------------------|-------------------|
| Ag | -0.0000000036026 | 0.0000000030595   | 0.0000000001444   |
| I  | 0.00000000180131 | -0.00000000152978 | 2.63879085661082  |
| I  | 0.00000000180131 | -0.00000000152978 | -2.63879085662527 |

##### 3e.AgI<sub>2</sub>

|   |                   |                   |                   |
|---|-------------------|-------------------|-------------------|
| C | -2.23158293952058 | 1.47279361334950  | -1.06117155060219 |
| N | -1.11436930070931 | 2.11375002082184  | -0.61942089169539 |
| C | -0.22554511742009 | 1.22831859260588  | -0.03636586416826 |
| C | -0.79591184629567 | -0.00688475815678 | -0.12103960136252 |
| N | -2.01076957877651 | 0.16354638829549  | -0.75827338463902 |
| H | -0.44322860550193 | -0.97547677890520 | 0.21202437492424  |
| C | -2.99281812777848 | -0.89091431553805 | -0.95887607406631 |



|    |                   |                   |                   |
|----|-------------------|-------------------|-------------------|
| Ag | -4.01653895394462 | 2.31125385650297  | -1.72201780694210 |
| C  | -5.78440330854018 | 3.15199820165180  | -2.42379879009095 |
| N  | -5.90400316911834 | 4.29954738149751  | -3.14658480108779 |
| C  | -7.22649331251901 | 4.68331351813837  | -3.26630811822912 |
| C  | -7.96420149271484 | 3.73913531027639  | -2.61597566136124 |
| N  | -7.06658452703205 | 2.81621783626916  | -2.11033409757304 |
| C  | -4.77321174828362 | 5.08420802169715  | -3.61967409490179 |
| H  | -7.52657886119152 | 5.58618615748919  | -3.78397698047378 |
| H  | -3.57357038649956 | -0.66411265691030 | -1.86071050840032 |
| H  | -3.67506921683459 | -0.92775930813660 | -0.09644681271157 |
| H  | -2.47655670002343 | -1.85031409107734 | -1.08402590269288 |
| H  | -3.96599842870455 | 4.40090599851725  | -3.90802821422117 |
| H  | -4.41568142416935 | 5.74180756665698  | -2.81224965075285 |
| H  | -5.08279754693926 | 5.67588782321861  | -4.48937983329297 |
| C  | -0.90909485072903 | 3.55349967440817  | -0.68380265925266 |
| C  | -7.44813609780612 | 1.62405564508562  | -1.36561839127269 |
| H  | -1.68652372236048 | 3.99227277309389  | -1.31748608901869 |
| H  | 0.08335493875813  | 3.77165811391657  | -1.09978212296790 |
| H  | -1.00491351514025 | 3.99908572159978  | 0.31505679787230  |
| H  | -6.65034945161795 | 1.36531353429743  | -0.65624069971198 |
| H  | -7.62688439216726 | 0.78301456572824  | -2.05009181091861 |
| H  | -8.36200630111685 | 1.83281251722824  | -0.79707761072631 |
| H  | 0.72248314180809  | 1.54596328463764  | 0.38105303363002  |
| H  | -9.03387926751755 | 3.64875414343703  | -2.47129282533777 |
| Ag | -4.52370349232268 | 3.49773600617213  | 0.94084051020173  |
| I  | -3.97580212603221 | 5.93519052193886  | 0.11105598721483  |
| I  | -5.03215855553806 | 1.04950821169241  | 1.78315906862887  |

### TS1<sub>3e</sub>

|   |                  |                   |                   |
|---|------------------|-------------------|-------------------|
| C | 1.72633364322064 | -0.55856657663988 | 0.84373726713943  |
| N | 2.66526445605366 | -0.92275110860641 | -0.07533305826015 |
| C | 3.14248363952333 | -2.20181870904477 | 0.16676046396786  |
| C | 2.47960627191915 | -2.65640133249771 | 1.26815703792289  |
| N | 1.62606335963470 | -1.64245073087999 | 1.66583609264104  |

|    |                   |                   |                   |
|----|-------------------|-------------------|-------------------|
| H  | 2.54753718164943  | -3.60074394776934 | 1.79518764743372  |
| C  | 0.69867053582707  | -1.72322607727661 | 2.79249878680454  |
| Ag | 0.46915056308387  | 1.11033887871493  | 1.04019365627650  |
| C  | -1.53174813575407 | 1.11836812001359  | -0.42032587920047 |
| N  | -1.82577423434645 | 2.19975796856652  | -1.20836080335679 |
| C  | -2.18231333759538 | 1.81785119607410  | -2.48749399629707 |
| C  | -2.11059874335701 | 0.45514806210763  | -2.51886000754669 |
| N  | -1.71444025126220 | 0.05075580036178  | -1.26030273556592 |
| C  | -1.80933456070337 | 3.58121071472194  | -0.74625143985072 |
| H  | -2.46076222375852 | 2.53034052113221  | -3.25520960311060 |
| H  | -0.31035157807521 | -2.00794147345512 | 2.46047278860388  |
| H  | 0.63385920977184  | -0.73886595029650 | 3.27153475843179  |
| H  | 1.07425733984730  | -2.45929138865529 | 3.51263633132625  |
| H  | -1.16421626981686 | 4.18656377254517  | -1.39712270783954 |
| H  | -1.41942826022979 | 3.60228487165006  | 0.27945044216729  |
| H  | -2.82721908334077 | 3.99401524040054  | -0.75605681917219 |
| C  | 3.11601616945006  | -0.06182544614884 | -1.15520228673787 |
| C  | -1.53871000086171 | -1.33534097129310 | -0.85046029636753 |
| H  | 2.53407326488101  | 0.86544571948212  | -1.10829841079105 |
| H  | 2.95216210702918  | -0.54762942897449 | -2.12675536465884 |
| H  | 4.18289975788139  | 0.17380407655100  | -1.04110700986925 |
| H  | -2.15419645434148 | -1.53643589481633 | 0.04127503545682  |
| H  | -0.48325264224817 | -1.52099406516796 | -0.60889115900641 |
| H  | -1.84962079501722 | -1.99004882389911 | -1.67232393896334 |
| H  | 3.90576161899244  | -2.66848268550339 | -0.44454898117676 |
| H  | -2.31494113167834 | -0.24511190246029 | -3.32038054650902 |
| Ag | -2.18593073143475 | 0.94801716105484  | 1.78657205919987  |
| I  | -0.37446657767971 | 2.99371600455906  | 2.89655870070873  |
| I  | -3.49683410726405 | -1.20969159455036 | 2.63241397619956  |

**[3e-I]<sub>2</sub>**

|   |                   |                  |                   |
|---|-------------------|------------------|-------------------|
| C | -3.66806144818878 | 1.30000734911505 | -1.19154399451469 |
| N | -3.50640447528425 | 1.25399744385572 | 0.15999762756508  |
| C | -2.27454682271801 | 0.72684427540732 | 0.50132803991768  |

|    |                    |                   |                   |
|----|--------------------|-------------------|-------------------|
| C  | -1.63745091432296  | 0.44496116297910  | -0.66916714777294 |
| N  | -2.49751214869441  | 0.81261231974592  | -1.68599783970623 |
| H  | -0.66563339086933  | 0.00624915680263  | -0.85862524469247 |
| C  | -2.26404163678940  | 0.53583146599164  | -3.09320785001857 |
| Ag | -5.28544500021997  | 2.02527794077548  | -2.27556118317879 |
| H  | -2.47497508686532  | -0.52473387253761 | -3.29469496580152 |
| H  | -1.22370529952918  | 0.76920194489988  | -3.35159162157266 |
| H  | -2.93951335389255  | 1.16181899990394  | -3.68770363777172 |
| C  | -4.55047596044461  | 1.58317338704080  | 1.11320528713912  |
| H  | -5.29354432939823  | 2.20983885570635  | 0.60642210506318  |
| H  | -4.12534108496867  | 2.13369926448976  | 1.96191553271232  |
| H  | -5.03250095208469  | 0.66221060113130  | 1.47219790337762  |
| H  | -1.96425404906111  | 0.58646694639277  | 1.52940101651289  |
| I  | -7.07545237988862  | 3.31045658065709  | -3.67871083340069 |
| C  | -7.89349784033403  | -0.13407849373300 | -2.27779817178877 |
| N  | -8.44682696202553  | -0.15314792826836 | -3.52098279504134 |
| C  | -9.66207240159676  | 0.50385149360529  | -3.53983592053196 |
| C  | -9.89278035209745  | 0.93316395042049  | -2.26791768761555 |
| N  | -8.80696343609223  | 0.52733304788594  | -1.51411117987470 |
| H  | -10.71767436646182 | 1.49520643388925  | -1.84770146584740 |
| C  | -8.59733969338919  | 0.88010114490094  | -0.12179166424240 |
| Ag | -6.10030530545669  | -1.00076681734346 | -1.68715568507634 |
| H  | -7.80516357473375  | 0.23730197763758  | 0.27946906268525  |
| H  | -9.52054834973001  | 0.72282432976545  | 0.45023993572496  |
| H  | -8.28811853989621  | 1.93270782770018  | -0.04592350237511 |
| C  | -7.75810673396591  | -0.63161935441988 | -4.70772682060038 |
| H  | -7.29353626483889  | 0.21979864130634  | -5.22645185433377 |
| H  | -8.46904359094050  | -1.13675552104582 | -5.37325714702702 |
| H  | -6.97993229314407  | -1.33830358372951 | -4.39695098038259 |
| H  | -10.24516105525183 | 0.62362390130657  | -4.44451285852032 |
| I  | -4.07902925692430  | -2.48012154403525 | -0.94135414250998 |

**[3e-I]**

|   |                   |                  |                   |
|---|-------------------|------------------|-------------------|
| C | -2.31126210010713 | 1.34406416666384 | -0.31991145973844 |
|---|-------------------|------------------|-------------------|

|    |                   |                   |                   |
|----|-------------------|-------------------|-------------------|
| N  | -1.87295510102232 | 1.37362885225984  | 0.97085634107981  |
| C  | -0.73136116317216 | 0.60720589264403  | 1.13514416415790  |
| C  | -0.44043308134566 | 0.07847041812940  | -0.08648608656148 |
| N  | -1.41372925130853 | 0.53941428700116  | -0.95696371025588 |
| H  | 0.36404618791168  | -0.57542125144978 | -0.40185583418211 |
| C  | -1.47719842907454 | 0.20843387859504  | -2.37285400802495 |
| Ag | -3.96174555569553 | 2.30357623201805  | -1.12473546056268 |
| H  | -1.58796960310476 | -0.87600831301850 | -2.50551701970723 |
| H  | -0.56756042133822 | 0.55018643443447  | -2.88441380854248 |
| H  | -2.34804618004922 | 0.71837467051240  | -2.80066760112007 |
| C  | -2.52582181326785 | 2.11916278771363  | 2.03690831611006  |
| H  | -1.83914939073860 | 2.86801079982711  | 2.45353829050147  |
| H  | -2.85310591146457 | 1.43730484075178  | 2.83299561518479  |
| H  | -3.39911839893661 | 2.62485236005024  | 1.60885928288621  |
| H  | -0.22947853975215 | 0.50263100235826  | 2.08981081967808  |
| I  | -6.01850811803381 | 3.50876040920901  | -2.12101104720300 |

### **H<sub>2</sub>O**

|   |                   |                  |                   |
|---|-------------------|------------------|-------------------|
| O | -2.14457894072702 | 3.09418542284217 | -2.61004134309271 |
| H | -1.65204034978344 | 3.92534373702200 | -2.51302025270523 |
| H | -1.85014564798955 | 2.73946477463584 | -3.46462723160205 |

### **[3e-I].H<sub>2</sub>O**

|    |                   |                   |                   |
|----|-------------------|-------------------|-------------------|
| C  | -2.18692800113969 | 0.99774276047968  | -0.58722056592225 |
| N  | -1.93851163967537 | 0.96314403817275  | 0.75169032862246  |
| C  | -0.63814314946287 | 0.56601099226742  | 1.01051147084765  |
| C  | -0.05009284238505 | 0.33930385591448  | -0.19791687874008 |
| N  | -1.01082845108897 | 0.60889156151578  | -1.15755471761995 |
| H  | 0.95122350990368  | 0.01014740532513  | -0.44915169371816 |
| C  | -0.79886399965720 | 0.48720957475734  | -2.59170421204354 |
| Ag | -3.95212693706419 | 1.53668342421478  | -1.52878873981994 |
| H  | -0.54832097464722 | -0.54939819614988 | -2.85416633014160 |
| H  | 0.01227830751089  | 1.15345743501725  | -2.91440894902194 |
| H  | -1.72822664747962 | 0.77531014562290  | -3.09636421279760 |

|   |                   |                  |                   |
|---|-------------------|------------------|-------------------|
| C | -2.90304039468169 | 1.33640184466914 | 1.78108305402781  |
| H | -2.65353760434800 | 2.32445847765830 | 2.19144339211978  |
| H | -2.88000110288000 | 0.59263571692114 | 2.58796982382051  |
| H | -3.91181103754644 | 1.36647184838196 | 1.34626765449566  |
| H | -0.24615246036626 | 0.47712378156947 | 2.01678513793002  |
| I | -6.19641191637171 | 2.24766184924894 | -2.64244909263872 |
| O | -6.13205890218455 | 1.43635367060200 | 0.90886111709906  |
| H | -6.53082802557730 | 0.57046134121220 | 0.71809681740923  |
| H | -6.26254450325841 | 1.91982137799919 | 0.06212966369159  |

### TS<sub>2e</sub>

|    |                   |                   |                   |
|----|-------------------|-------------------|-------------------|
| C  | 2.24695338955520  | -0.39292715930829 | 0.51209588778970  |
| N  | 1.79879636437996  | -1.45873438456733 | 1.23977973679275  |
| C  | 1.89533394175229  | -2.64268070760120 | 0.53281078970270  |
| C  | 2.44196483854581  | -2.32868112537742 | -0.67621036457954 |
| N  | 2.65039243125624  | -0.96105445160780 | -0.66398768561329 |
| H  | 2.69373044193335  | -2.95597572337555 | -1.52343439681484 |
| C  | 3.18489140264840  | -0.20124976691987 | -1.78311532582807 |
| Ag | 0.25087686399669  | 1.25105159711179  | 0.29014072005894  |
| H  | 2.50011889878856  | -0.25456139512056 | -2.64069600605838 |
| H  | 4.16755691432093  | -0.59400358302588 | -2.07753636161889 |
| H  | 3.28948684520441  | 0.84371009164754  | -1.47266071858854 |
| C  | 1.13520283990972  | -1.33276077854430 | 2.52830360077373  |
| H  | 1.47155969638255  | -0.40652829946289 | 3.00578832830862  |
| H  | 1.39626362206615  | -2.18704418338053 | 3.16561276166243  |
| H  | 0.04504231815726  | -1.28520286210225 | 2.38340977491585  |
| H  | 1.56834158751655  | -3.59420807151623 | 0.93546821432060  |
| O  | 2.29330456107463  | 2.34970591657505  | 0.58447235476177  |
| H  | 2.51861997208190  | 1.36301799806718  | 0.77018863477973  |
| H  | 2.37078595161399  | 2.83779420494311  | 1.42238437896122  |
| I  | -2.05410529378466 | 0.07627750546544  | 0.18699385437346  |

### [AgIOH].LH

|   |                  |                  |                  |
|---|------------------|------------------|------------------|
| C | 4.35856066010374 | 0.34381386473576 | 0.42685678890684 |
|---|------------------|------------------|------------------|

|    |                  |                   |                   |
|----|------------------|-------------------|-------------------|
| N  | 4.53776401965471 | -0.60286710101598 | 1.36573092805612  |
| C  | 5.00221396303862 | -1.75555879031900 | 0.76019950948083  |
| C  | 5.14049056457008 | -1.48025678401031 | -0.57106253208235 |
| N  | 4.74167573680365 | -0.17067113501695 | -0.75541325649347 |
| H  | 5.47104689572985 | -2.10285761070539 | -1.39288276712916 |
| C  | 4.63150256946702 | 0.54882143841267  | -2.02365576442070 |
| Ag | 1.45125435556851 | 0.53848402062177  | 0.12934563922271  |
| H  | 4.19864914377692 | -0.12414729152097 | -2.77313770710886 |
| H  | 5.62295381218068 | 0.88571219144931  | -2.35403531310025 |
| H  | 3.95155078899216 | 1.40069202430662  | -1.85223285392606 |
| C  | 4.04967032985499 | -0.50661633548617 | 2.73649321941985  |
| H  | 4.00910361758121 | 0.54839183249546  | 3.02612042415432  |
| H  | 4.73112485030454 | -1.04720339946622 | 3.40318883617426  |
| H  | 3.03642012087293 | -0.94018025280886 | 2.77533143737913  |
| H  | 5.17150127282971 | -2.66788001910514 | 1.31784338137041  |
| O  | 2.56999799762163 | 2.21707744668578  | -0.43146235312807 |
| H  | 3.93237110828900 | 1.35537050120233  | 0.53225987178599  |
| H  | 2.01948195979526 | 3.01421754260159  | -0.48107986553449 |
| I  | 0.73955573296463 | -1.79954843055631 | 1.00697307777292  |

## LH

|   |                  |                   |                   |
|---|------------------|-------------------|-------------------|
| C | 3.86166028158448 | 0.02068470157162  | 0.57292484086737  |
| N | 3.80571668881322 | -1.18827331484266 | 1.15315820655961  |
| C | 4.42135701345270 | -2.10555149331479 | 0.32282290601759  |
| C | 4.85437943831218 | -1.42232753701722 | -0.77954619184714 |
| N | 4.49563350168962 | -0.09928087354280 | -0.60406684331750 |
| H | 5.38246839215324 | -1.76309773489362 | -1.66257046963629 |
| C | 4.76450927437442 | 0.99083807107470  | -1.54548507614650 |
| H | 4.27852002366967 | 0.77433741213011  | -2.50419076706743 |
| H | 5.84681909987767 | 1.09018474732690  | -1.69009138549055 |
| H | 4.36426884586269 | 1.92378514114207  | -1.13637815544336 |
| C | 3.19255677230219 | -1.48703464905397 | 2.45002377068024  |
| H | 2.79005157235997 | -0.56272194464188 | 2.87627680817029  |
| H | 3.95022067153807 | -1.90093713509642 | 3.12587577322135  |

|   |                  |                   |                  |
|---|------------------|-------------------|------------------|
| H | 2.38003134545523 | -2.21028088322069 | 2.31283767249744 |
| H | 4.50078230950866 | -3.15492901328677 | 0.58209064764656 |
| H | 3.46194812184596 | 0.94013831876545  | 0.98597787138834 |

### [AgIOH]

|    |                   |                  |                  |
|----|-------------------|------------------|------------------|
| Ag | 0.35383046419453  | 1.31640094725006 | 0.39101840650331 |
| O  | 2.16138750510486  | 2.29281161757808 | 0.52185408830465 |
| H  | 2.14959844452767  | 2.68749698800962 | 1.41089591710299 |
| I  | -1.93285253222706 | 0.04800139876224 | 0.13994354118905 |

### 3e.H<sub>2</sub>O

|    |                   |                   |                   |
|----|-------------------|-------------------|-------------------|
| C  | -2.20029017085864 | 1.61585433934553  | -0.35555818187010 |
| N  | -1.50167113109274 | 1.92811429855477  | 0.77170461216051  |
| C  | -0.33755656138769 | 1.18560556995784  | 0.86159548020735  |
| C  | -0.30260042524043 | 0.38551908540213  | -0.24148052933806 |
| N  | -1.44726084694076 | 0.66088757208705  | -0.96676206323878 |
| H  | 0.42790788592813  | -0.34843208864040 | -0.56084338390107 |
| C  | -1.77392090408917 | 0.04057549632840  | -2.24559222168636 |
| Ag | -3.98919606212377 | 2.41921156717883  | -1.04462503255020 |
| C  | -5.78258292730621 | 3.20105807507572  | -1.74451294382756 |
| N  | -6.00400415814650 | 3.84677344837148  | -2.92263858968713 |
| C  | -7.33021197300225 | 4.21943905095530  | -3.04722786099887 |
| C  | -7.96222770707088 | 3.79601029703811  | -1.91671821758037 |
| N  | -7.00163322854547 | 3.17782912425718  | -1.13671163536795 |
| C  | -4.98446415397000 | 4.11722271503981  | -3.92952395212263 |
| H  | -7.70936721242997 | 4.74468539879066  | -3.91596480400779 |
| H  | -2.84133784508588 | 0.18814153540903  | -2.44161206664020 |
| H  | -1.55520491109857 | -1.03283544807764 | -2.19844027446131 |
| H  | -1.20064217040183 | 0.51478283892902  | -3.05165801436875 |
| H  | -4.03105514418067 | 3.68409782623775  | -3.60351395116248 |
| H  | -4.86595631834582 | 5.20099798437983  | -4.06037371557979 |
| H  | -5.27886897347185 | 3.66735381974268  | -4.88673986025722 |
| C  | -1.93111089496415 | 2.89647382969974  | 1.77179916029226  |
| C  | -7.27036576835143 | 2.57994719072172  | 0.16430132268290  |

|   |                   |                  |                   |
|---|-------------------|------------------|-------------------|
| H | -2.85641475521456 | 3.36574692357893 | 1.42002737653515  |
| H | -1.16161941841595 | 3.66723523024903 | 1.90763340774699  |
| H | -2.11832377837168 | 2.39597225013391 | 2.73079997485984  |
| H | -6.34195481275466 | 2.13180412571618 | 0.53507009517463  |
| H | -8.03655418708436 | 1.79968816130760 | 0.07077400563627  |
| H | -7.61365093010916 | 3.34624404071375 | 0.87147079991163  |
| H | 0.35304707698363  | 1.27989427860572 | 1.69135494438362  |
| H | -8.99810247934671 | 3.88047006411766 | -1.60983436643109 |
| O | -1.68571104333054 | 3.08688971543191 | -3.57536426756586 |
| H | -1.16986080314125 | 3.65230447581797 | -2.97603533626087 |
| H | -1.29783397943798 | 3.24691168644266 | -4.45292197558662 |

### TS3<sub>3e</sub>

|    |                   |                   |                   |
|----|-------------------|-------------------|-------------------|
| C  | 2.10411962371552  | -0.46006135090919 | 0.49173775425811  |
| N  | 1.79761631339669  | -1.54213652227760 | 1.26605403284152  |
| C  | 2.04338721259055  | -2.73404697170988 | 0.60660124848209  |
| C  | 2.51836188755733  | -2.39927520395727 | -0.62811909901119 |
| N  | 2.54601747726748  | -1.01680015327335 | -0.67405020289517 |
| H  | 2.84115297030576  | -3.02331727862494 | -1.45390469590295 |
| C  | 3.00179727977400  | -0.24121869246920 | -1.82173896943296 |
| Ag | 0.18650652211063  | 1.43501945984977  | 0.27104721578728  |
| C  | -1.76627494657786 | 1.06477922189961  | -0.25447660260025 |
| N  | -2.30438677785723 | -0.12683336881138 | -0.63757903879840 |
| C  | -3.65218396949801 | 0.00359755335494  | -0.92332132431602 |
| C  | -3.96910973650273 | 1.31186347769737  | -0.71357715450014 |
| N  | -2.80615353232275 | 1.94151633652590  | -0.30694478945929 |
| C  | -1.56540615890612 | -1.37740682880124 | -0.74451516131845 |
| H  | -4.26364237056685 | -0.83012114671339 | -1.24798393560266 |
| H  | 2.34901771434935  | -0.41775103894667 | -2.68696322054163 |
| H  | 4.03046769969361  | -0.52136572276334 | -2.08228026245365 |
| H  | 2.97500750237558  | 0.82039967195789  | -1.55513223935753 |
| H  | -0.52830848888853 | -1.19033491918036 | -0.44496124327279 |
| H  | -1.58573010354276 | -1.74262909892868 | -1.77953445886766 |
| H  | -2.00622001787858 | -2.13491631102275 | -0.08343166562505 |



|   |                   |                   |                   |
|---|-------------------|-------------------|-------------------|
| C | 1.30370629872569  | -1.44863313130921 | 2.63296538529926  |
| C | -2.71948912279351 | 3.35964503721458  | 0.01848855441235  |
| H | 1.10234033939102  | -0.39554328303533 | 2.85453903813760  |
| H | 2.05189629630860  | -1.83138009716949 | 3.33963050320907  |
| H | 0.37588905162205  | -2.02510870100646 | 2.74294337003822  |
| H | -1.68235172859848 | 3.58654386166597  | 0.28833273849997  |
| H | -3.37714513519302 | 3.59422040039651  | 0.86524710167633  |
| H | -3.00963938624067 | 3.96411123622088  | -0.85024815142005 |
| H | 1.87726680549697  | -3.70443728182101 | 1.06078090401206  |
| H | -4.91069356801266 | 1.83786001926409  | -0.81913928454144 |
| O | 2.21207248469822  | 2.25219992153519  | 0.77606161350923  |
| H | 2.44267017909139  | 1.25910942146817  | 0.88942508761449  |
| H | 2.38744138490932  | 2.73245148367986  | 1.60404695213969  |

#### [LAgOH].LH

|    |                   |                   |                   |
|----|-------------------|-------------------|-------------------|
| C  | -2.98854156100841 | 0.31163241330241  | 2.27072312518772  |
| N  | -2.29055535207476 | 0.79479783432390  | 3.31370951383009  |
| C  | -2.43194871467160 | -0.05717698836299 | 4.39632243047455  |
| C  | -3.23810315367286 | -1.08281701604098 | 3.98954851273962  |
| N  | -3.56848562903423 | -0.83287547276452 | 2.67034902616580  |
| H  | -3.59613527438910 | -1.95563386110392 | 4.52236712476997  |
| C  | -4.41062142639657 | -1.65920563322584 | 1.80353568854469  |
| Ag | -5.03955521617956 | 1.88213677162755  | -1.27526900138033 |
| C  | -6.44462595339686 | 3.07510658942928  | -2.14593367841598 |
| N  | -6.31919806527405 | 4.37972736119793  | -2.52015844192274 |
| C  | -7.48159984799893 | 4.84763541823001  | -3.10764047963711 |
| C  | -8.36423901983066 | 3.81029879882496  | -3.10342111828246 |
| N  | -7.71360692775234 | 2.74041236523110  | -2.51418733930796 |
| C  | -5.11683031090324 | 5.18133157848111  | -2.34095621815982 |
| H  | -7.58239493262103 | 5.86198512253222  | -3.47522123471316 |
| H  | -4.42715450999708 | -1.18129819257587 | 0.81342872372990  |
| H  | -5.42423201750765 | -1.71444996755294 | 2.21950543488746  |
| H  | -3.98561793113484 | -2.66793472391374 | 1.73352295410061  |
| H  | -4.36858798980063 | 4.56298281646108  | -1.83287788226100 |

|   |                   |                  |                   |
|---|-------------------|------------------|-------------------|
| H | -5.33887606053287 | 6.06512269118702 | -1.72885836948508 |
| H | -4.72419834637824 | 5.49995003589290 | -3.31538803728127 |
| C | -1.50622410101700 | 2.02674332329802 | 3.29352452729807  |
| C | -8.31327176315952 | 1.42749220187606 | -2.32158109111702 |
| H | -1.58851529262793 | 2.47463455433016 | 2.29820244477466  |
| H | -0.45397495153862 | 1.80239031909451 | 3.50726258993723  |
| H | -1.89307463099795 | 2.72762823965345 | 4.04345386963633  |
| H | -7.56662271319790 | 0.77803171380103 | -1.85137143757491 |
| H | -8.60841033142881 | 1.00075070120288 | -3.28893521176111 |
| H | -9.19424607798747 | 1.50399414709009 | -1.67096950363618 |
| H | -1.95391920906937 | 0.13384574609685 | 5.34974237743011  |
| H | -9.38337343085649 | 3.74579989393659 | -3.46590364797860 |
| O | -3.65215250171961 | 0.67239603402238 | -0.37517826899511 |
| H | -3.10281722502032 | 0.70248064614926 | 1.21903995818939  |
| H | -3.00059335702267 | 0.40774519346776 | -1.04592639428639 |

**[LAgOH]**

|    |                   |                  |                   |
|----|-------------------|------------------|-------------------|
| Ag | -5.03713838380886 | 1.80096660274758 | -1.41455750023749 |
| C  | -6.43400058134331 | 3.03574872943631 | -2.21104981969617 |
| N  | -6.31041059614460 | 4.35495648911589 | -2.54514132259802 |
| C  | -7.49122944590256 | 4.86182760558628 | -3.06229235910509 |
| C  | -8.38873210448486 | 3.83742958593189 | -3.05570318833649 |
| N  | -7.72746658019581 | 2.73699022632842 | -2.53597776026690 |
| C  | -5.08685588551446 | 5.12250492023215 | -2.38063167360510 |
| H  | -7.59312956914313 | 5.89056286323179 | -3.38702839078413 |
| H  | -4.33924108329837 | 4.46334168706595 | -1.92412845780741 |
| H  | -5.26308690642808 | 5.98550392280059 | -1.72429824600479 |
| H  | -4.71923767705419 | 5.47168882147079 | -3.35522665882096 |
| C  | -8.32983107171024 | 1.42658791102027 | -2.34917998652993 |
| H  | -7.55565253999593 | 0.75206756197601 | -1.96541679246822 |
| H  | -8.70770462029761 | 1.04168590505847 | -3.30594268034180 |
| H  | -9.15404810790324 | 1.48315282279814 | -1.62511589661443 |
| H  | -9.42448343418299 | 3.80144557926015 | -3.37208054788922 |
| O  | -3.77097037520005 | 0.49599705635633 | -0.59773216111106 |

|   |                   |                  |                   |
|---|-------------------|------------------|-------------------|
| H | -2.87916388349166 | 0.88044114398296 | -0.56827391408275 |
|---|-------------------|------------------|-------------------|

### [LAgH<sub>2</sub>O]

|    |                   |                  |                   |
|----|-------------------|------------------|-------------------|
| Ag | -4.48163095558252 | 3.66608381311816 | -1.91558387218590 |
| C  | -6.45567390039852 | 3.86374088815405 | -2.39157936006979 |
| N  | -7.09522919766275 | 3.34857824733529 | -3.47527410114423 |
| C  | -8.43536201252523 | 3.68904917249789 | -3.46076087639289 |
| C  | -8.63799887412474 | 4.43637207909104 | -2.33935555238611 |
| N  | -7.41607672069494 | 4.53190399231379 | -1.69895423551489 |
| C  | -6.47286635166902 | 2.54392316410211 | -4.52077706313654 |
| H  | -9.12298261600822 | 3.37635355738378 | -4.23782868974648 |
| H  | -5.40686744313956 | 2.43765879169017 | -4.29243028691682 |
| H  | -6.58684759851598 | 3.03884861438255 | -5.49332453787133 |
| H  | -6.93636321726472 | 1.55004302893310 | -4.55672748393040 |
| C  | -7.20713274718864 | 5.25711083907234 | -0.45113903878106 |
| H  | -6.15123037080981 | 5.17283238682704 | -0.17256808400772 |
| H  | -7.82757916380653 | 4.82493813988162 | 0.34397310342341  |
| H  | -7.46338110235769 | 6.31572445872545 | -0.58376263609572 |
| H  | -9.53625450286603 | 4.90111271509486 | -1.95003404205764 |
| O  | -2.36511483740282 | 3.40692491532514 | -1.46915621217600 |
| H  | -2.08691018276415 | 2.85814109106157 | -0.71519868298738 |
| H  | -1.75865457371803 | 4.16713401111004 | -1.50574589672249 |

### Structures for 3c mechanism

#### 3c.AgI<sub>2</sub>

|    |                   |                   |                   |
|----|-------------------|-------------------|-------------------|
| C  | -2.40619671494676 | 1.59119376386139  | -0.57671836108628 |
| N  | -1.22137745746332 | 2.06970634245290  | -0.12687242149666 |
| N  | -0.28196033497851 | 1.09398667597941  | 0.11878450864157  |
| C  | -0.91679608934406 | -0.01233894455715 | -0.17303961362377 |
| N  | -2.20073071745488 | 0.24065490322817  | -0.58410772593320 |
| H  | -0.48758153695081 | -1.00605173070144 | -0.09767851660402 |
| C  | -3.18474346983598 | -0.75120077051579 | -1.00771411011208 |
| Ag | -4.06897368175103 | 2.52587959097914  | -1.42432521445521 |

|   |                   |                   |                   |
|---|-------------------|-------------------|-------------------|
| C | -5.97354415131998 | 3.01964188342153  | -2.11838315085740 |
| N | -6.39201514561610 | 3.97100367431092  | -3.00298051459014 |
| C | -7.66343761870354 | 3.65966391782314  | -3.41747277658674 |
| N | -8.10167270094086 | 2.57003817686018  | -2.84101269279569 |
| N | -7.05299618545221 | 2.20317609491867  | -2.03241776947263 |
| C | -5.60914681098232 | 5.12090382059567  | -3.43917790422669 |
| H | -8.22817038024789 | 4.24642098142633  | -4.13445135691951 |
| H | -4.08547970051001 | -0.66934599843870 | -0.38673881525602 |
| H | -2.74691832336313 | -1.74945326970091 | -0.89445424780585 |
| H | -3.46476142770560 | -0.58717758675373 | -2.05954875744314 |
| H | -5.73803757144549 | 5.95526621258027  | -2.73714439997297 |
| H | -5.94596664733473 | 5.42352382903364  | -4.43723750013349 |
| H | -4.54731795754742 | 4.83945371269446  | -3.48627439159314 |
| H | 0.08413906685507  | 7.16963946091459  | 0.44397380960820  |
| C | -0.18361090826305 | 6.11741818955765  | 0.34061205768296  |
| C | -1.49483680175275 | 5.70206027511518  | 0.58000122177860  |
| H | -2.25429519996715 | 6.42552377820580  | 0.87904189355429  |
| C | -1.84288467896371 | 4.35929517500020  | 0.44620610149257  |
| H | -2.86108079829699 | 4.02098547454464  | 0.64051831780449  |
| C | -0.86892110442986 | 3.43847780652569  | 0.05671041501298  |
| C | 0.44775756645863  | 3.83742575635209  | -0.17670378274793 |
| H | 1.18477271700928  | 3.09770757005243  | -0.48445618479276 |
| C | 0.78450352220401  | 5.18159833558287  | -0.03049870808872 |
| H | 1.80924013569113  | 5.50058800474209  | -0.22412445352405 |
| C | -7.14557256297784 | 1.00624496341965  | -1.26192494392049 |
| C | -7.67311690916623 | -0.14248953625211 | -1.85158937927316 |
| H | -8.00317863202754 | -0.10833618994363 | -2.88822084903203 |
| C | -7.73475124023071 | -1.31826467875323 | -1.10422276912169 |
| H | -8.13498365382048 | -2.22298852318467 | -1.56288610876478 |
| C | -7.26855256200802 | -1.34484553729513 | 0.21232126659531  |
| H | -7.31632570746135 | -2.26909265526070 | 0.78989293717434  |
| C | -6.74940482547550 | -0.18434287081473 | 0.79249486134700  |
| H | -6.40069917800352 | -0.19411308772345 | 1.82614864254576  |
| C | -6.69049415870332 | 1.00067245709722  | 0.05832426747214  |

|    |                   |                   |                   |
|----|-------------------|-------------------|-------------------|
| H  | -6.30181307316449 | 1.91779880971196  | 0.50008820472598  |
| Ag | -3.33679810997265 | 1.88462849163172  | -4.21159177466329 |
| I  | -1.82985643688262 | 3.97435826268797  | -3.66236722531987 |
| I  | -4.93596798945500 | -0.15830977561266 | -4.57517884822256 |

**TS1<sub>3c</sub>**

|    |                   |                   |                   |
|----|-------------------|-------------------|-------------------|
| C  | 1.64950611716463  | -0.56241436893735 | 1.04974324836994  |
| N  | 2.31101123751576  | -0.56944911613351 | -0.13347925828994 |
| N  | 3.12762045767135  | -1.66576380112422 | -0.31466482978276 |
| C  | 2.96916737286127  | -2.34314871033812 | 0.79273794953054  |
| N  | 2.09447010827323  | -1.71244813378262 | 1.64340806527333  |
| H  | 3.47078904288304  | -3.27947333418112 | 1.01593130370240  |
| C  | 1.67422983629346  | -2.19042394117981 | 2.95545246087659  |
| Ag | 0.15346119965371  | 0.69558367351325  | 1.79685768171603  |
| C  | -1.58178794095081 | 0.72936473019460  | -0.20803958799311 |
| N  | -1.46330790198698 | 1.56724602416385  | -1.27948191108760 |
| N  | -1.55109369899033 | 0.93049821293946  | -2.50168081718095 |
| C  | -1.72749387575980 | -0.32197242680643 | -2.17660244037159 |
| N  | -1.74341292535229 | -0.48943453064503 | -0.81714721712423 |
| H  | 2.55234144271783  | -2.49235107939383 | 3.53942872370242  |
| H  | 0.98830636537589  | -3.04175710288104 | 2.85346019787344  |
| H  | 1.15799291177210  | -1.36859772930154 | 3.46576874523470  |
| C  | -2.01360960543155 | -1.72758188118498 | -0.10441536286855 |
| H  | -2.98766834214546 | -1.64466340443389 | 0.40555493959028  |
| H  | -1.22707016033919 | -1.89519144390685 | 0.64343683578427  |
| H  | -2.02683098354264 | -2.55631595359277 | -0.82182792861095 |
| H  | -1.84785141750159 | -1.12976491131904 | -2.89115844608542 |
| Ag | -2.61638021727423 | 1.08386699790196  | 1.74194104538821  |
| I  | -0.94094951938702 | 2.09001423387017  | 3.84485847562666  |
| I  | -5.11365827007486 | 0.16366913642788  | 1.57116152470699  |
| H  | -0.61084697875213 | 5.53079136900629  | 0.87753863654782  |
| C  | -0.79216266076747 | 5.01999930622239  | -0.06903442477734 |
| C  | -0.79368518629082 | 5.73161667355897  | -1.27079421532641 |
| H  | -0.61204729662615 | 6.80704890038106  | -1.27363818254774 |

|   |                   |                   |                   |
|---|-------------------|-------------------|-------------------|
| C | -1.04350974198656 | 5.05537515671160  | -2.46714103674341 |
| H | -1.05958151355894 | 5.60061671474352  | -3.41199642983997 |
| C | -1.27847351583331 | 3.68135600637564  | -2.47065966668196 |
| H | -1.46513042709717 | 3.14330276780471  | -3.39748543408914 |
| C | -1.26196501144757 | 2.97784131353083  | -1.26181604537356 |
| C | -1.02724997988113 | 3.64634651251412  | -0.05670218192392 |
| H | -1.02553430172066 | 3.10815166464339  | 0.89157666045420  |
| H | 1.83581378792149  | 3.76561357218859  | -1.56396990288541 |
| C | 1.97457500266020  | 2.71688970218255  | -1.82783921854122 |
| C | 2.07739007356907  | 1.76410060768395  | -0.81559146556376 |
| H | 2.04619088100177  | 2.05941537152879  | 0.23376187057863  |
| C | 2.22945501846546  | 0.41899473315162  | -1.16029962795091 |
| C | 2.30380442070940  | 0.01846471626278  | -2.49598070091216 |
| H | 2.43677907573041  | -1.03604175253389 | -2.73451250218631 |
| C | 2.20859470408721  | 0.98338100390799  | -3.49739149811884 |
| H | 2.25702122071493  | 0.67735466237348  | -4.54299622262695 |
| C | 2.03778799220244  | 2.32950076025773  | -3.16732433670060 |
| H | 1.94846094417799  | 3.07896257797954  | -3.95424781097054 |

### [3c-I]<sub>2</sub>

|    |                   |                   |                   |
|----|-------------------|-------------------|-------------------|
| C  | -3.13459305564108 | 1.52524129137756  | -1.34614211725207 |
| N  | -2.06080154154158 | 2.26939599465155  | -0.99059861222640 |
| N  | -0.97059103699725 | 1.53100806840398  | -0.59547595226812 |
| C  | -1.39541130999328 | 0.29837806060171  | -0.70238168916561 |
| N  | -2.70067599857855 | 0.25204636738920  | -1.12358622657151 |
| H  | -0.79795340546200 | -0.57934762501462 | -0.48101378811636 |
| C  | -3.42596763833517 | -0.94929001012092 | -1.50729152146614 |
| Ag | -4.94739507199666 | 2.17095225492340  | -2.12042582298752 |
| H  | -4.50037980102519 | -0.75247843417031 | -1.42582528220319 |
| H  | -3.14835715947490 | -1.77340742273041 | -0.83968268122917 |
| H  | -3.16936531062516 | -1.20154221835271 | -2.54705185530582 |
| H  | -1.64540673331630 | 7.52833462889596  | -1.41558556206240 |
| C  | -1.73310917984388 | 6.44469985784798  | -1.32511012184206 |
| C  | -2.84136596289894 | 5.88498871558963  | -0.68468465517784 |

|    |                   |                   |                    |
|----|-------------------|-------------------|--------------------|
| H  | -3.62039199789806 | 6.52647509149174  | -0.27078729269180  |
| C  | -2.95474373826758 | 4.49986618542444  | -0.55891483529223  |
| H  | -3.80892557873867 | 4.04884913121963  | -0.05340342522057  |
| C  | -1.95047435708501 | 3.68687860952104  | -1.08735340722540  |
| C  | -0.83635120825465 | 4.23073673215767  | -1.72963939042675  |
| H  | -0.07967003715979 | 3.56321806934608  | -2.14128162181552  |
| C  | -0.73278125549855 | 5.61694900665549  | -1.84338455557045  |
| H  | 0.13170249803103  | 6.05076948578612  | -2.34736950278510  |
| I  | -7.29608190050974 | 3.02873154350424  | -2.84365751592069  |
| C  | -4.60085946222065 | 3.45607608130605  | -5.38789970880675  |
| N  | -5.54764153392313 | 3.27365103554863  | -6.33970278324144  |
| N  | -6.30688361045062 | 4.39150618274837  | -6.59444272049152  |
| C  | -5.82144250307746 | 5.27691745823006  | -5.76327919643260  |
| N  | -4.78414720636886 | 4.75972128177095  | -5.03021059034278  |
| H  | -6.19049437462249 | 6.29190150887079  | -5.66146166167919  |
| C  | -4.10317676707084 | 5.42583759503192  | -3.93160787314144  |
| Ag | -3.13375006098141 | 2.12063288971891  | -4.76500927240634  |
| H  | -4.68931922953920 | 5.29735709707853  | -3.01126087889405  |
| H  | -3.98752950068880 | 6.49190276566893  | -4.16002485816522  |
| H  | -3.11664600900960 | 4.96962338445013  | -3.79567541440751  |
| H  | -6.53597648267776 | -1.22371222121251 | -8.94897508675111  |
| C  | -6.33954839535355 | -0.29644676839519 | -8.40923263584664  |
| C  | -6.03294918526398 | -0.33215524057402 | -7.04753912119142  |
| H  | -5.99990538173264 | -1.28413939440384 | -6.51669049320344  |
| C  | -5.78576143942885 | 0.84963802742754  | -6.35016682946052  |
| H  | -5.59549685554622 | 0.84476749680221  | -5.27663028498860  |
| C  | -5.82762053103112 | 2.06368051519831  | -7.03867828500185  |
| C  | -6.14806378473866 | 2.11720566462802  | -8.39606703642060  |
| H  | -6.19239031265347 | 3.08237899451533  | -8.89940288829182  |
| C  | -6.40592627081687 | 0.92886321628039  | -9.07762967363719  |
| H  | -6.65241693440115 | 0.96133396959777  | -10.13960699715805 |
| I  | -1.13053462979043 | 0.48275258121334  | -4.40418440411598  |

[3c-I]

|    |                   |                   |                   |
|----|-------------------|-------------------|-------------------|
| C  | -2.15812989524955 | 1.51386995917266  | -0.95713202807968 |
| N  | -1.17479337939598 | 2.04667057400137  | -0.18902955796812 |
| N  | -0.22855249535061 | 1.13240051176802  | 0.22166499378945  |
| C  | -0.64884685645233 | 0.00914686111651  | -0.29840297296618 |
| N  | -1.80754617291590 | 0.19278785921801  | -1.00929629680380 |
| H  | -0.15038002463745 | -0.94758524312713 | -0.17981735953403 |
| C  | -2.55205887460705 | -0.83250149155098 | -1.73076066506533 |
| Ag | -3.78662537727387 | 2.36430925634375  | -1.91192462555396 |
| H  | -3.57018555789948 | -0.90487527327569 | -1.33019017021695 |
| H  | -2.03867528317640 | -1.79322002343015 | -1.60971336336269 |
| H  | -2.60610687308407 | -0.57332647205111 | -2.79499731353961 |
| H  | -0.55203109705197 | 7.13204197752788  | 1.17435854634438  |
| C  | -0.68386386110565 | 6.08452356473703  | 0.90097198224891  |
| C  | -1.96599506712194 | 5.56967675339694  | 0.70006409594511  |
| H  | -2.84182533853676 | 6.20815753378730  | 0.81910492468039  |
| C  | -2.14304801400989 | 4.23075467140411  | 0.35411081391442  |
| H  | -3.14464482224954 | 3.82263832546958  | 0.21362402627079  |
| C  | -1.02027874366132 | 3.41549890926302  | 0.19246080283349  |
| C  | 0.26819406682762  | 3.91540196395830  | 0.39723520627027  |
| H  | 1.12550138161967  | 3.25523541165543  | 0.27538986345284  |
| C  | 0.42883287896623  | 5.25291253664273  | 0.75504973284284  |
| H  | 1.43331814470943  | 5.64777982570285  | 0.91191161079624  |
| I  | -5.80849128324318 | 3.35520246926953  | -3.17047724749875 |

**[3c-I].H<sub>2</sub>O**

|    |                   |                   |                   |
|----|-------------------|-------------------|-------------------|
| C  | -2.05601276602456 | 1.60015638871220  | -1.05176879705560 |
| N  | -1.16906555142529 | 2.08103234417257  | -0.14606897175560 |
| N  | -0.44221582974782 | 1.10357094757931  | 0.49584278070320  |
| C  | -0.90486846264574 | -0.00581398349316 | -0.01884172228197 |
| N  | -1.87998355778381 | 0.24695773375600  | -0.95099424896485 |
| H  | -0.56450300835629 | -0.99910362896581 | 0.25587635444167  |
| C  | -2.61603161617220 | -0.75383132229189 | -1.71276815078263 |
| Ag | -3.34411399503324 | 2.59146387965306  | -2.34239931065793 |
| H  | -3.30405796206922 | -1.30301779482896 | -1.05677152557031 |



|   |                   |                   |                   |
|---|-------------------|-------------------|-------------------|
| H | -1.91649168978474 | -1.45454820517492 | -2.18537910829864 |
| H | -3.19186275806188 | -0.23295178905197 | -2.48612039524619 |
| H | -0.17217861364822 | 7.17101786375394  | 0.93890686918050  |
| C | -0.38198888481872 | 6.12242707650575  | 0.72351580557316  |
| C | -1.68177098738422 | 5.71761200535477  | 0.41443891307086  |
| H | -2.50405222685618 | 6.43328904537937  | 0.38769022836971  |
| C | -1.95878681733951 | 4.37795600502005  | 0.14207931375510  |
| H | -2.98739700904792 | 4.08099050215589  | -0.06945188011893 |
| C | -0.91275325876604 | 3.45450634280111  | 0.16364745347467  |
| C | 0.39221240245622  | 3.84041899136208  | 0.47983803354160  |
| H | 1.18541408811191  | 3.09423901016690  | 0.50084773780400  |
| C | 0.64998937118262  | 5.18065440442396  | 0.76311769350265  |
| H | 1.66703326119275  | 5.49014182641406  | 1.00724555176527  |
| I | -4.97477096395223 | 3.74903367035396  | -4.00426290156264 |
| O | -5.00998406233943 | 5.06778165593319  | -0.62988083811506 |
| H | -5.86103619768238 | 4.67873334846522  | -0.36920438894648 |
| H | -4.99469695500373 | 4.93780717614303  | -1.60483761502549 |

### TS<sub>2c</sub>

|    |                   |                   |                   |
|----|-------------------|-------------------|-------------------|
| C  | 2.39428883000066  | -0.26842485724568 | 0.79174786969530  |
| N  | 1.71425122034147  | -1.39778193555655 | 1.16678453066187  |
| C  | 1.82727089499545  | -2.34655516920336 | 0.18339824042344  |
| N  | 2.56919534960865  | -1.92057574292224 | -0.80433883292634 |
| N  | 2.91200748249223  | -0.64503359309982 | -0.40985948145907 |
| Ag | 0.67959715241110  | 1.64421973704943  | 0.72303022442287  |
| C  | 0.84543699113007  | -1.49414437910702 | 2.33082261952097  |
| H  | 1.29902722662674  | -0.94865118883940 | 3.16512172503884  |
| H  | 0.72748340639417  | -2.54833802784730 | 2.60817865482605  |
| H  | -0.13612753047667 | -1.05562601990062 | 2.09218526282541  |
| H  | 1.36485098243927  | -3.32748734866661 | 0.22395228036168  |
| O  | 2.60223195206842  | 2.28080846621026  | 1.90978359716256  |
| H  | 2.73866220259614  | 1.28603545543722  | 1.73875859114506  |
| H  | 2.43514664596589  | 2.39358905643541  | 2.86142874158286  |
| I  | -1.61759943152272 | 0.81758372851987  | -0.13545592538034 |

|   |                  |                   |                   |
|---|------------------|-------------------|-------------------|
| H | 4.32432733750994 | 1.54135020599469  | 0.25074128137522  |
| C | 4.37672556600230 | 1.27745118021820  | -0.80357624079288 |
| C | 3.69906572449965 | 0.15572161502687  | -1.28995653789844 |
| C | 3.76841854537712 | -0.19049427484810 | -2.64270760874106 |
| H | 3.22971751111226 | -1.06707496186712 | -2.99754776941706 |
| C | 4.52227376257968 | 0.59729516697067  | -3.51097788062682 |
| H | 4.57277919379862 | 0.32902235843951  | -4.56703434696589 |
| C | 5.19742049643008 | 1.72508774417843  | -3.03998620436387 |
| H | 5.78151384337157 | 2.34116384495167  | -3.72465910653238 |
| C | 5.11936442699016 | 2.05994471829324  | -1.68667250015107 |
| H | 5.64483203115761 | 2.93683793827831  | -1.30648386878688 |

**[AgIH<sub>2</sub>O].L**

|    |                   |                   |                   |
|----|-------------------|-------------------|-------------------|
| C  | 5.81086907778020  | 0.31494243563965  | 0.87989375177854  |
| N  | 5.79480444521265  | -0.98673513640077 | 1.28751287510887  |
| C  | 7.06829223926591  | -1.49721026043182 | 1.21566616948897  |
| N  | 7.91555775112848  | -0.59996806666975 | 0.78443776156928  |
| N  | 7.11730714219913  | 0.50651665497266  | 0.57932434417794  |
| Ag | 2.23976818860455  | 0.32143070032295  | 0.01619277507250  |
| C  | 4.60610157252346  | -1.72861667829887 | 1.70038932511824  |
| H  | 4.01483220564602  | -1.11880008413488 | 2.39186419201022  |
| H  | 4.92049206805761  | -2.64914635083798 | 2.20565360831332  |
| H  | 3.97809974395273  | -1.97789189100293 | 0.83365184670755  |
| H  | 7.33337150177898  | -2.51553727072063 | 1.48154262855010  |
| H  | 4.56719300217447  | 1.29973708728086  | 0.70302745258451  |
| H  | 3.45562193178792  | 2.44074670161906  | 1.19166078899808  |
| I  | 0.87651533128477  | -1.82491276795793 | -0.33821628399717 |
| H  | 5.84061476946398  | 2.54479371996008  | -0.59856861972473 |
| C  | 6.91429106189601  | 2.69630730476395  | -0.49124652345993 |
| C  | 7.71395241142341  | 1.71235390268466  | 0.09803123656744  |
| C  | 9.09433009634883  | 1.88676829788721  | 0.22445944164250  |
| H  | 9.69397554533721  | 1.10002372822793  | 0.67882384835648  |
| C  | 9.67637671530406  | 3.06544477848226  | -0.24034814814350 |
| H  | 10.75368126989644 | 3.20378468448131  | -0.14212746548356 |

|   |                  |                  |                   |
|---|------------------|------------------|-------------------|
| C | 8.89035744348927 | 4.06220032398898 | -0.82161095385653 |
| H | 9.35051329886586 | 4.98262718146990 | -1.18285655542862 |
| C | 7.51224277407802 | 3.87177315019480 | -0.94366552220871 |
| H | 6.89127241779987 | 4.64004430106159 | -1.40603295098635 |
| O | 3.69299398779968 | 1.88470966931763 | 0.43012643194454  |

### [AgIH<sub>2</sub>O]

|    |                   |                  |                   |
|----|-------------------|------------------|-------------------|
| Ag | -3.08127219783262 | 1.78199618815039 | -4.37566050119282 |
| I  | -4.71551038706295 | 0.22879327869423 | -3.17611784675171 |
| O  | -1.61243563151368 | 3.12368336435388 | -5.45498314507485 |
| H  | -0.68716887830595 | 2.91313864879257 | -5.23903842953405 |
| H  | -1.68283891028481 | 3.05240863480891 | -6.42298605334655 |

### TS<sub>3e</sub>

|    |                  |                   |                   |
|----|------------------|-------------------|-------------------|
| C  | 5.78550965978304 | 0.34365746145471  | 0.98753329270369  |
| N  | 5.74140339728412 | -0.94934642631747 | 1.40056023563979  |
| C  | 6.99900737253500 | -1.48418416877109 | 1.27324613025720  |
| N  | 7.84665664549712 | -0.60451485891117 | 0.80425890990015  |
| N  | 7.07446346385389 | 0.52012369719067  | 0.63049886108882  |
| Ag | 2.55409405942074 | 0.35660615724907  | -0.29849268879741 |
| C  | 4.54537317397279 | -1.66215144140510 | 1.84661246281440  |
| H  | 4.00385569551133 | -1.04765843010094 | 2.57373271289157  |
| H  | 4.85468253547948 | -2.60091497114777 | 2.31956448832116  |
| H  | 3.88245147389668 | -1.87116482701031 | 0.99193261795349  |
| H  | 7.25208224890853 | -2.50807062987820 | 1.52816436751971  |
| H  | 4.75785797217405 | 1.19231527638618  | 0.87067710676412  |
| H  | 3.34478827522572 | 2.34686437560019  | 1.27449637152740  |
| I  | 1.50664023092161 | -1.87446019459207 | -1.04432803714156 |
| H  | 5.76261367800877 | 2.67315262888999  | -0.29247094035298 |
| C  | 6.85041756830865 | 2.75847091827595  | -0.33088772133647 |
| C  | 7.66865437461122 | 1.71504007485606  | 0.11314904979968  |
| C  | 9.06137865084509 | 1.80993660108879  | 0.06080625479979  |
| H  | 9.67093716763145 | 0.97784498391035  | 0.40826017937153  |
| C  | 9.64197470723362 | 2.97285352150860  | -0.44328770288773 |

|   |                   |                  |                   |
|---|-------------------|------------------|-------------------|
| H | 10.72890812544179 | 3.05137236780016 | -0.48701344155041 |
| C | 8.84219199869862  | 4.02805065312167 | -0.88626189833968 |
| H | 9.30151167282872  | 4.93535566293520 | -1.28038360158085 |
| C | 7.45137692651889  | 3.91488178000286 | -0.82662377621245 |
| H | 6.81865721572952  | 4.73111355035069 | -1.17725524638035 |
| O | 3.77593970267950  | 1.91021235331295 | 0.52109746792738  |

**[AgIOH].LH**

|    |                  |                   |                   |
|----|------------------|-------------------|-------------------|
| C  | 4.33722710399510 | 0.00722273293160  | 0.74222552285661  |
| N  | 3.77847267195759 | -1.20989725179788 | 0.91818442785045  |
| C  | 4.37611478457000 | -2.05589121570901 | 0.01995725199327  |
| N  | 5.29975112944375 | -1.44195178309544 | -0.67866326696514 |
| N  | 5.26376224001867 | -0.15220922723786 | -0.21609826362739 |
| Ag | 1.86675036272968 | 1.47675473130129  | -0.07587435866421 |
| C  | 2.61295892704885 | -1.49475684803692 | 1.74957439438449  |
| H  | 2.53177646895042 | -0.71744498111592 | 2.51551648835364  |
| H  | 2.73610480175180 | -2.47656264047110 | 2.22073880180618  |
| H  | 1.71587855746069 | -1.46863721345579 | 1.10893550898901  |
| H  | 4.10822579723703 | -3.10028380337410 | -0.09541636287034 |
| H  | 4.05164318442809 | 0.96251517223611  | 1.26419898184214  |
| H  | 2.79611790144277 | 3.06935768337906  | 1.80082531876528  |
| I  | 0.65417301943493 | -0.34238634863187 | -1.46938037349016 |
| H  | 4.93975562006492 | 2.50395399638168  | 0.01842450100605  |
| C  | 5.82566328894878 | 2.19888201233339  | -0.55409918144540 |
| C  | 6.12285183237351 | 0.84934938712931  | -0.76842861554681 |
| C  | 7.23185514559281 | 0.44408800952044  | -1.51436871490301 |
| H  | 7.42269155158147 | -0.61670982141491 | -1.66746952218346 |
| C  | 8.06837668788958 | 1.41871753691390  | -2.05476653414042 |
| H  | 8.93625601292839 | 1.11380809154062  | -2.64052718918222 |
| C  | 7.79899977963440 | 2.77352857006112  | -1.84747651442769 |
| H  | 8.45681851892990 | 3.53189363222105  | -2.27400030604388 |
| C  | 6.68265546630164 | 3.15454859726678  | -1.09956134818803 |
| H  | 6.46078121611083 | 4.21105375956460  | -0.94436460970393 |
| O  | 3.22594963557409 | 2.44690507715978  | 1.19379517393495  |

## LH

|   |                   |                   |                   |
|---|-------------------|-------------------|-------------------|
| C | 2.28683991252285  | -0.28814106648984 | 0.67658189870967  |
| N | 1.65772177646681  | -1.38161989311569 | 1.15374968276432  |
| C | 1.90167865634774  | -2.38406641591268 | 0.24823987326442  |
| N | 2.65306395942648  | -1.96318102864084 | -0.74293216927775 |
| N | 2.89058294055403  | -0.64930945527391 | -0.46013949387370 |
| C | 0.83306283635858  | -1.46037693434602 | 2.36448045357033  |
| H | 1.26606778341966  | -0.82148017702325 | 3.14131493393894  |
| H | 0.82603448990052  | -2.49777053244034 | 2.71428336318085  |
| H | -0.19123323516964 | -1.13796564832614 | 2.14025112355249  |
| H | 1.52484956152171  | -3.39708342062834 | 0.35141926704000  |
| H | 2.27839208528959  | 0.70122353275169  | 1.11940142960248  |
| H | 4.44166570266779  | 1.40710427344072  | 0.28883872543175  |
| C | 4.42654504455907  | 1.22053897203646  | -0.78594130196682 |
| C | 3.69560970463914  | 0.15951144309779  | -1.32642696614330 |
| C | 3.71757123470559  | -0.14019918822961 | -2.68955529877347 |
| H | 3.14124360081940  | -0.97996089965039 | -3.07529988282998 |
| C | 4.48694375931624  | 0.66020802144187  | -3.53140573517547 |
| H | 4.51406816611561  | 0.44214397041833  | -4.59896489933171 |
| C | 5.21295511607499  | 1.73645529285701  | -3.01462464448872 |
| H | 5.81257344974153  | 2.35733831184279  | -3.68051554429946 |
| C | 5.18372873184550  | 2.01384536005819  | -1.64532353231960 |
| H | 5.76699658537675  | 2.84000675763219  | -1.23897328477528 |

## References

1. M. V. Anokhin, A. D. Averin and I. P. Beletskaya, *Eur. J. Org. Chem.*, 2011, 6240-6253.
2. J. Zhao, L. Yang, L. Zhang, J. Guo, Y. Shi, G. Pang and C. Cao, *J. Chem. Res.*, 2011, **35**, 686-688.
